# Supplementary material for: Enantioselective total syntheses and determination of absolute configuration of marine toxins, oxazinins
Source: Royal Society of Chemistry journal article supplement (doi:10.1039/c3ra44631j), 2013-01-01

# Supporting Information

**Enantioselective total Syntheses and determination of absolute configuration of marine toxins, oxazinins.**

Dattatraya H. Dethe\* and Alok Ranjan

Department of Chemistry, Indian Institute of Technology Kanpur, Kanpur – 208016, India

**Tel:** + 91-512-2596537, **Fax:** + 91-512-2597436.

## Table of Contents:

|                                    |    |
|------------------------------------|----|
| NMR of Compound 15, 17, 18: .....  | 3  |
| NMR of Compound 19, 20, 22: .....  | 7  |
| NMR of Compound 24, 26, 27: .....  | 12 |
| NMR of Compound 21, 23, 25: .....  | 22 |
| NMR of Compound 13, 28: .....      | 27 |
| NMR of Compound 30: .....          | 33 |
| NMR of Compound 34: .....          | 47 |
| NMR of Compound 35 : .....         | 48 |
| NMR of compound 10: .....          | 21 |
| NMR of Compound 11: .....          | 18 |
| NMR of Compound 7: .....           | 35 |
| NMR of Compound 9: .....           | 31 |
| NMR of Compound 5: .....           | 40 |
| NMR of Compound 6 :.....           | 44 |
| NMR of Compound 1: .....           | 50 |
| NMR of Compound 2: .....           | 53 |
| NMR of Compound 4: .....           | 51 |
| CD Spectra of Oxazinin-5: .....    | 55 |
| CD Spectra of Preoxazinin-7: ..... | 56 |
| CD Spectra of Oxazinin-6: .....    | 57 |
| HPLC of Compound 21: .....         | 59 |

## NMR Spectrum:

30 May 2011  
 Alk

|                        |                |                       |       |              |                     |                  |         |
|------------------------|----------------|-----------------------|-------|--------------|---------------------|------------------|---------|
| Acquisition Time (sec) | 7.9167         | Comment               | Alk   | Date         | 19/10/2009 15:38:24 | Frequency (MHz)  | 200.13  |
| Nucleus                | <sup>1</sup> H | Original Points Count | 32768 | Points Count | 32768               | Sweep Width (Hz) | 4139.07 |
| Temperature (grad C)   | 0.000          |                       |       |              |                     |                  |         |

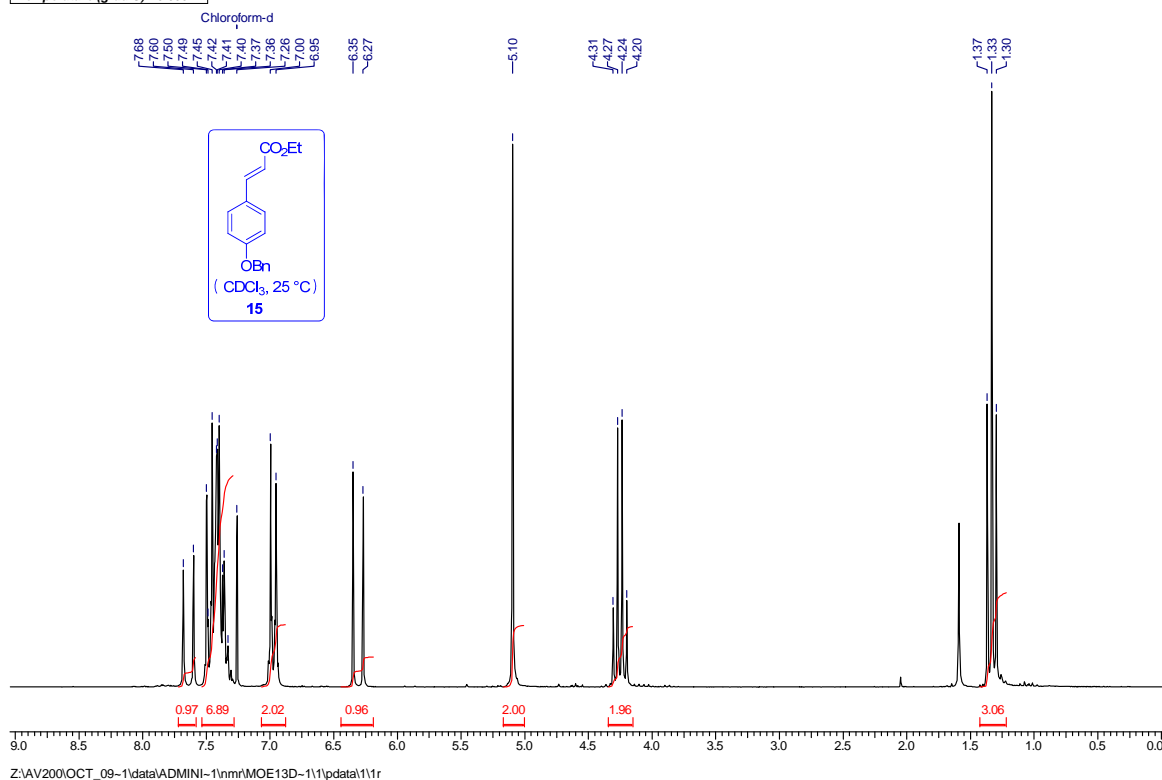

30 May 2011  
 Alk

|                        |                 |                       |       |              |                     |                  |          |
|------------------------|-----------------|-----------------------|-------|--------------|---------------------|------------------|----------|
| Acquisition Time (sec) | 2.7329          | Comment               | Alk   | Date         | 22/10/2009 07:47:24 | Frequency (MHz)  | 50.32    |
| Nucleus                | <sup>13</sup> C | Original Points Count | 32768 | Points Count | 32768               | Sweep Width (Hz) | 11990.41 |
| Temperature (grad C)   | 0.000           |                       |       |              |                     |                  |          |

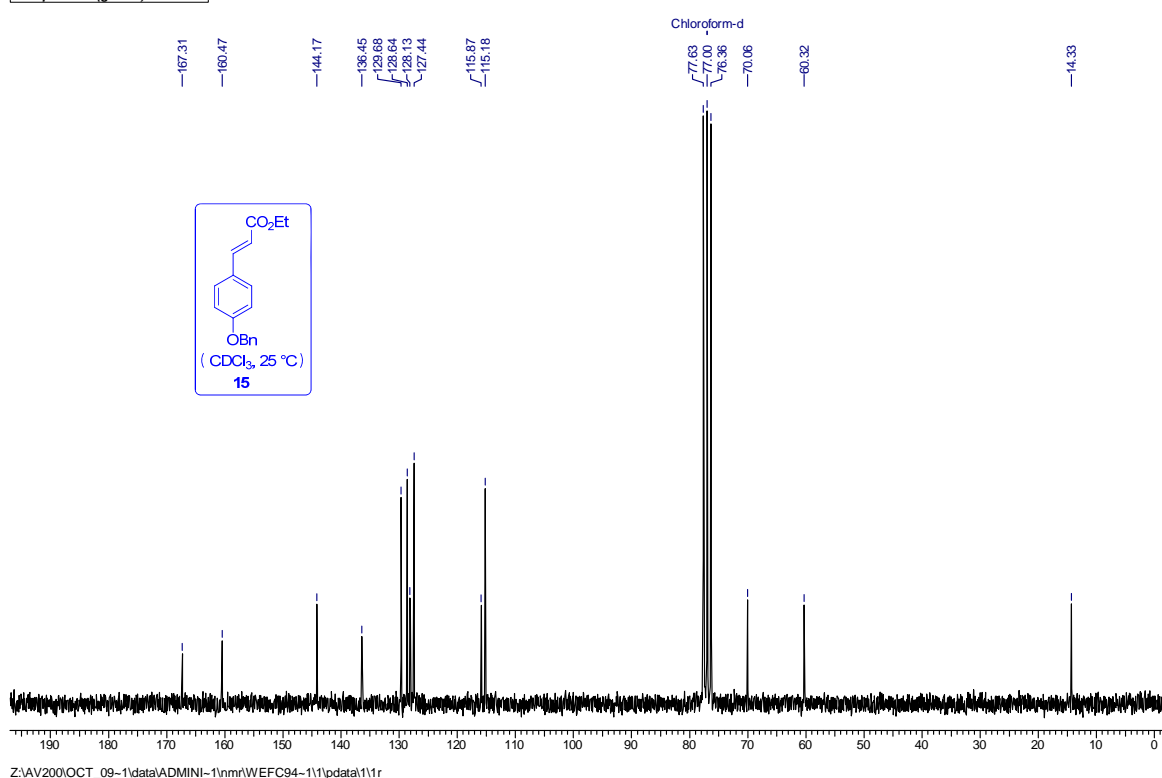

30 May 2011  
 Alk

|                        |                 |                       |       |              |                     |                  |          |
|------------------------|-----------------|-----------------------|-------|--------------|---------------------|------------------|----------|
| Acquisition Time (sec) | 2.7329          | Comment               | Alk   | Date         | 22/10/2009 08:22:32 | Frequency (MHz)  | 50.32    |
| Nucleus                | <sup>13</sup> C | Original Points Count | 32768 | Points Count | 32768               | Sweep Width (Hz) | 11990.41 |
| Temperature (grad C)   | 0.000           |                       |       |              |                     |                  |          |

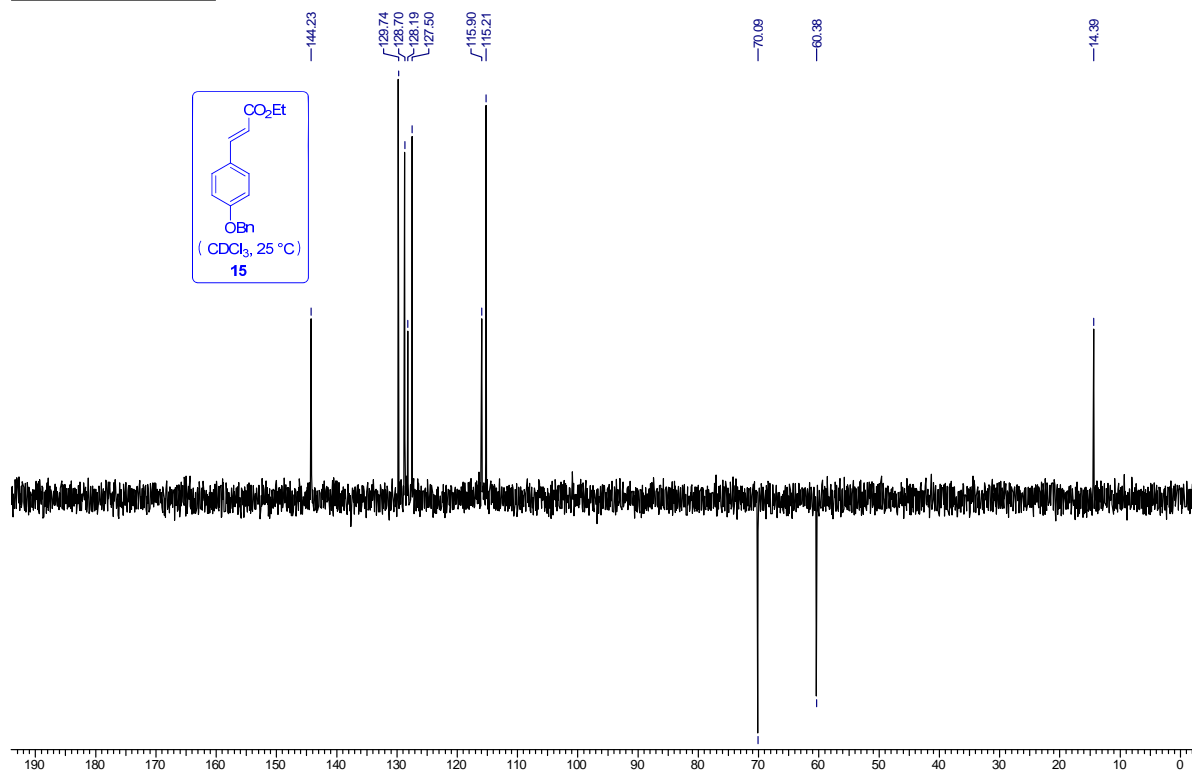

Z:\AV200\OCT\_09-1\data\ADMINI-1\1nm\WEFC94-1\2\data\11r

Sat2av2#029.001.001.1r.esp

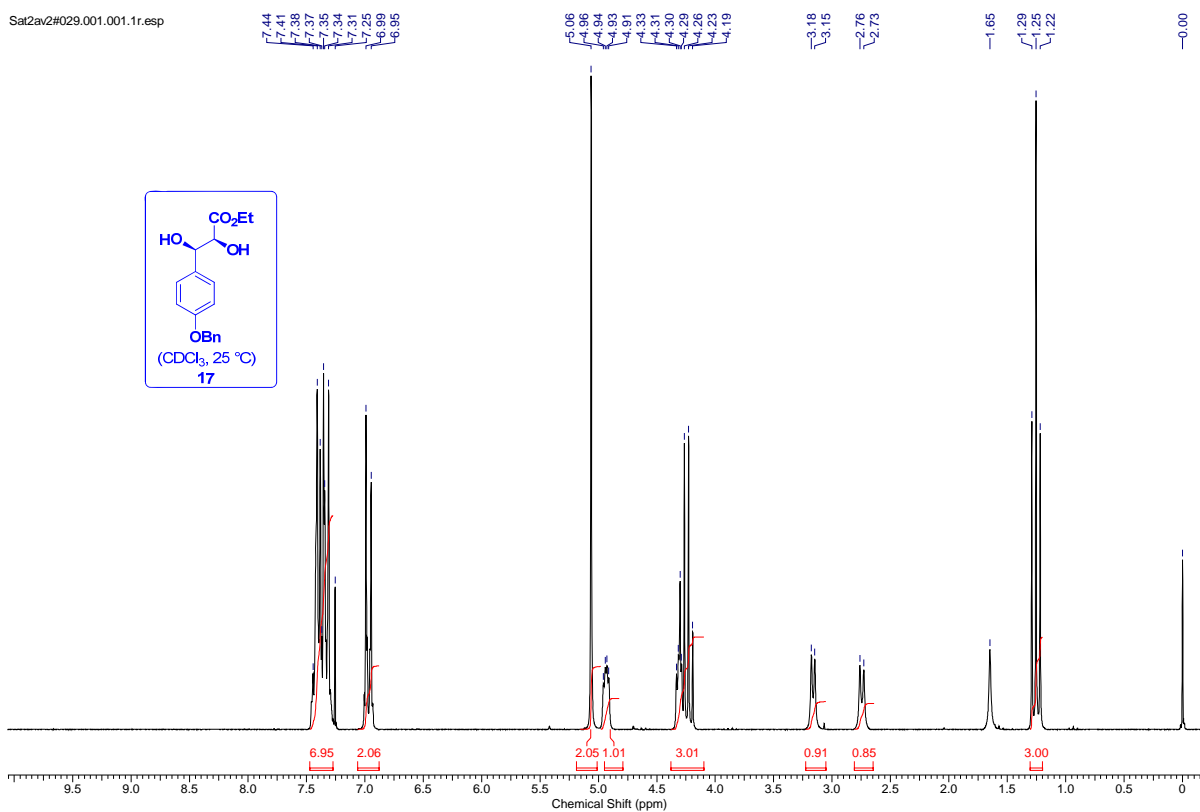

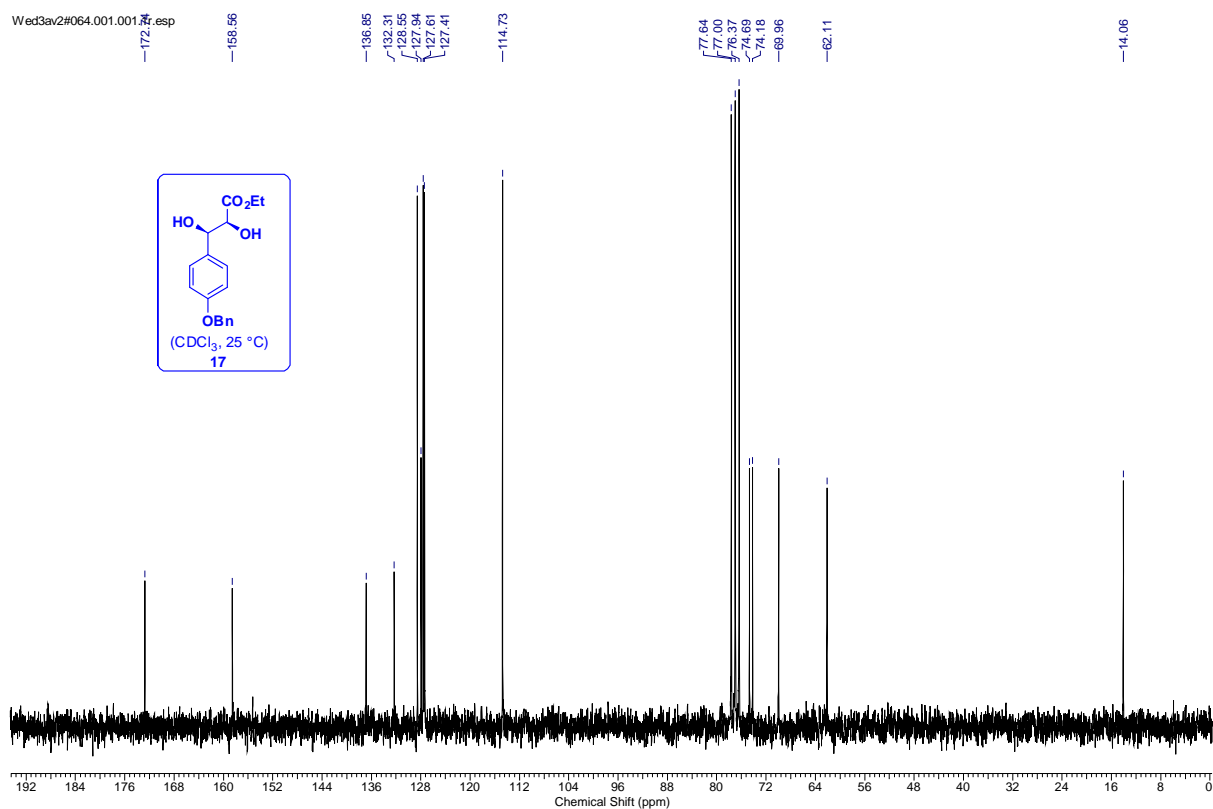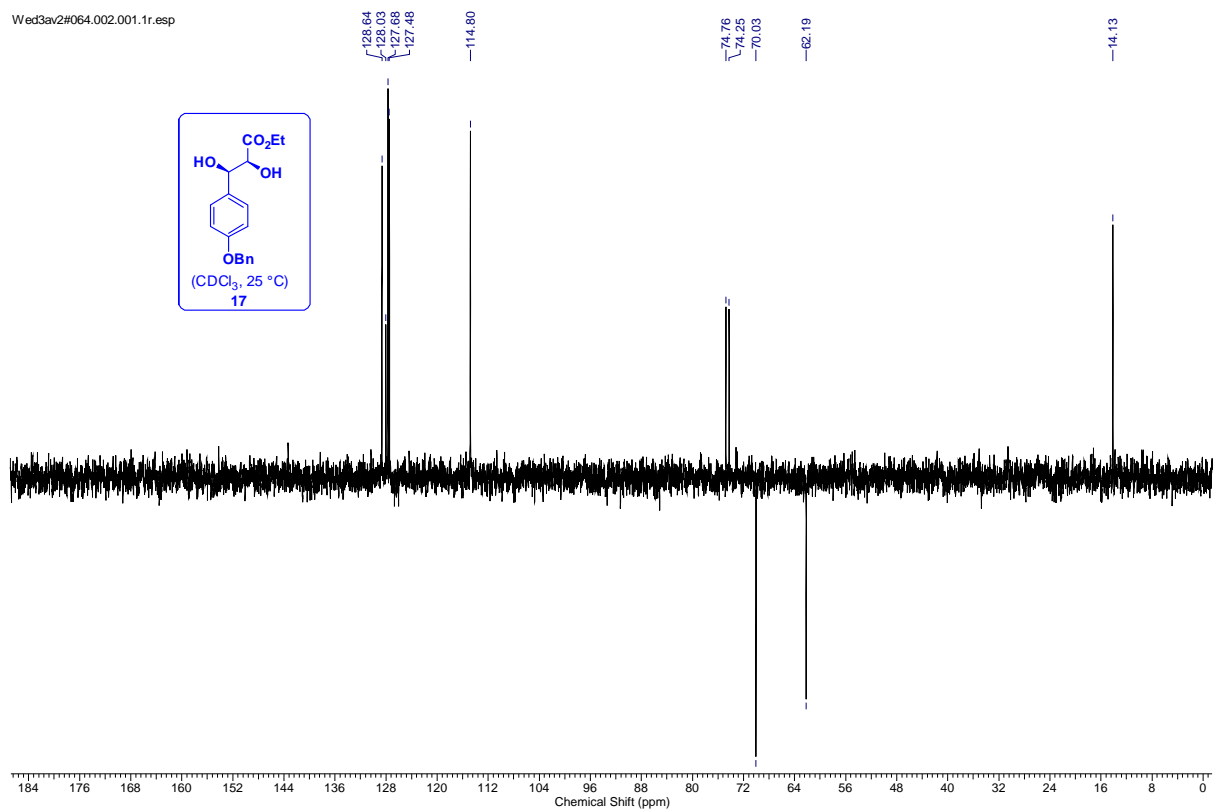

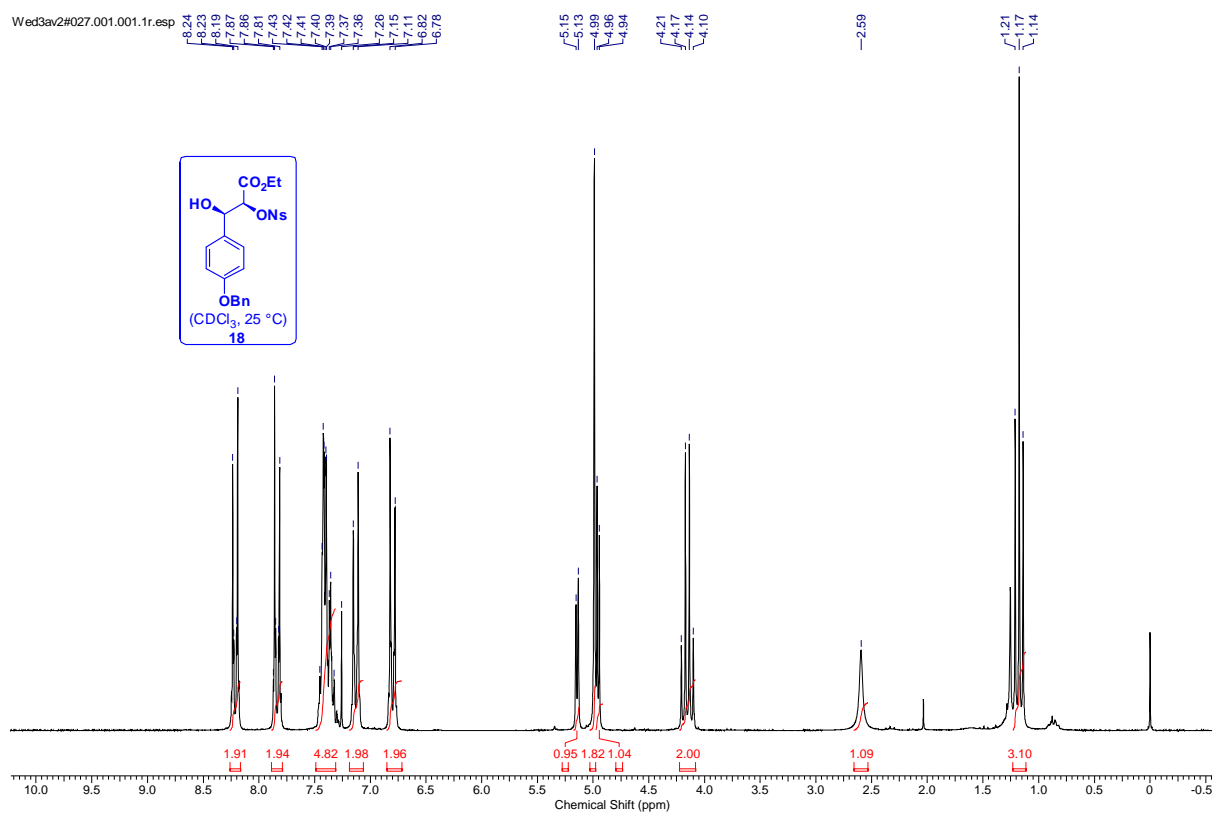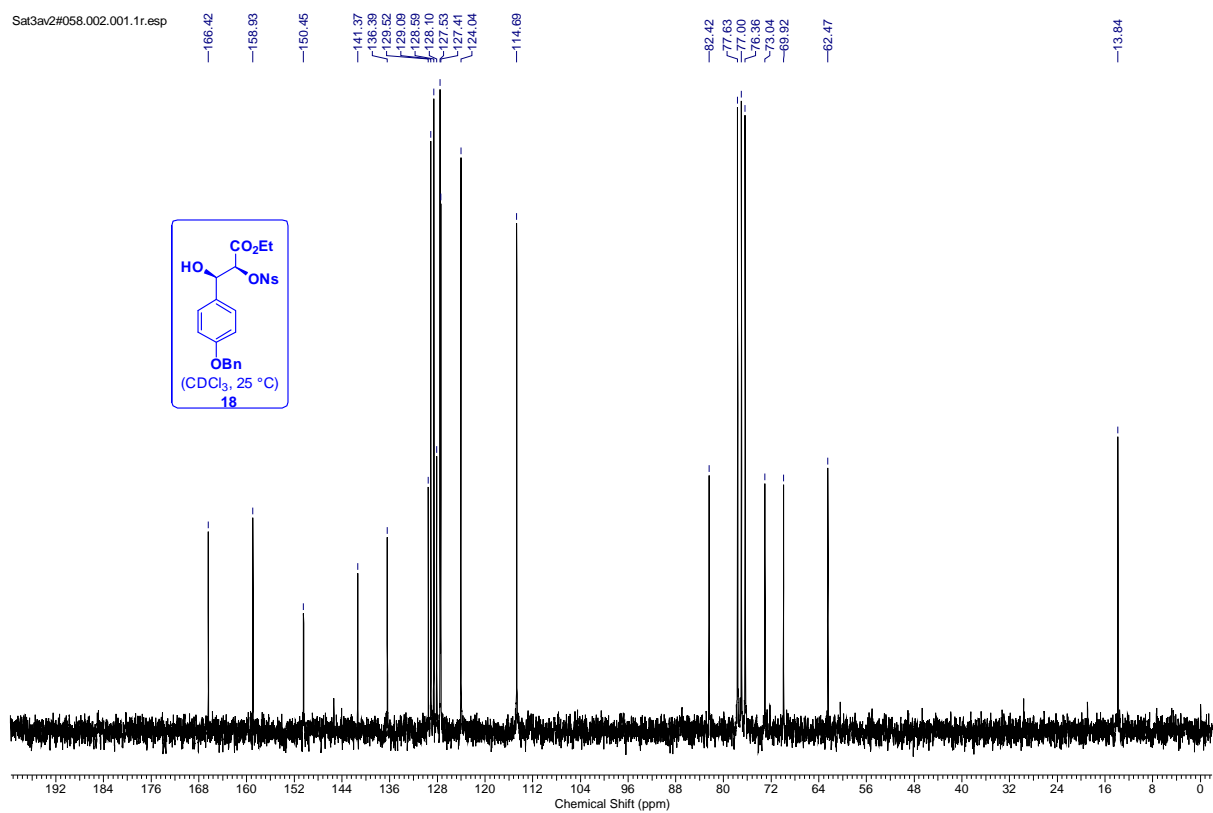

Sat3av2#058.001.001.1r.esp

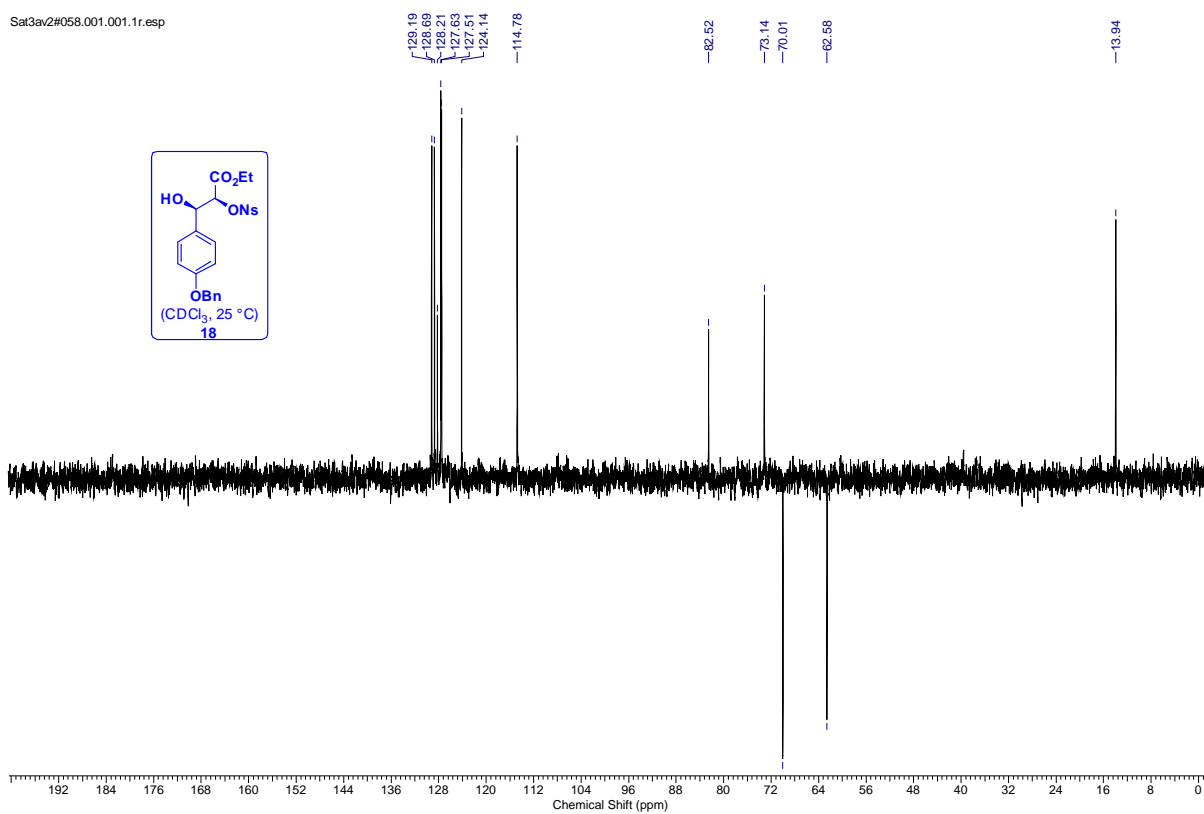

Sat4av2#004.001.001.1r.esp

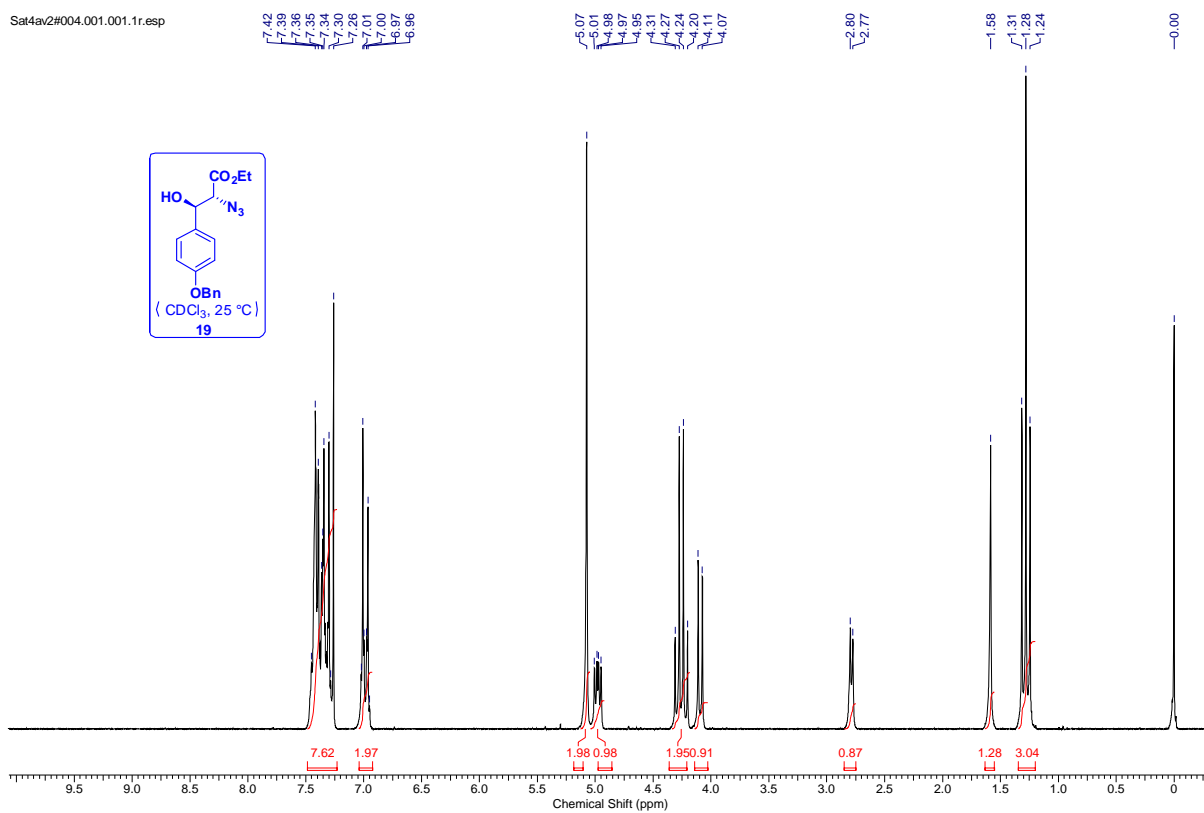

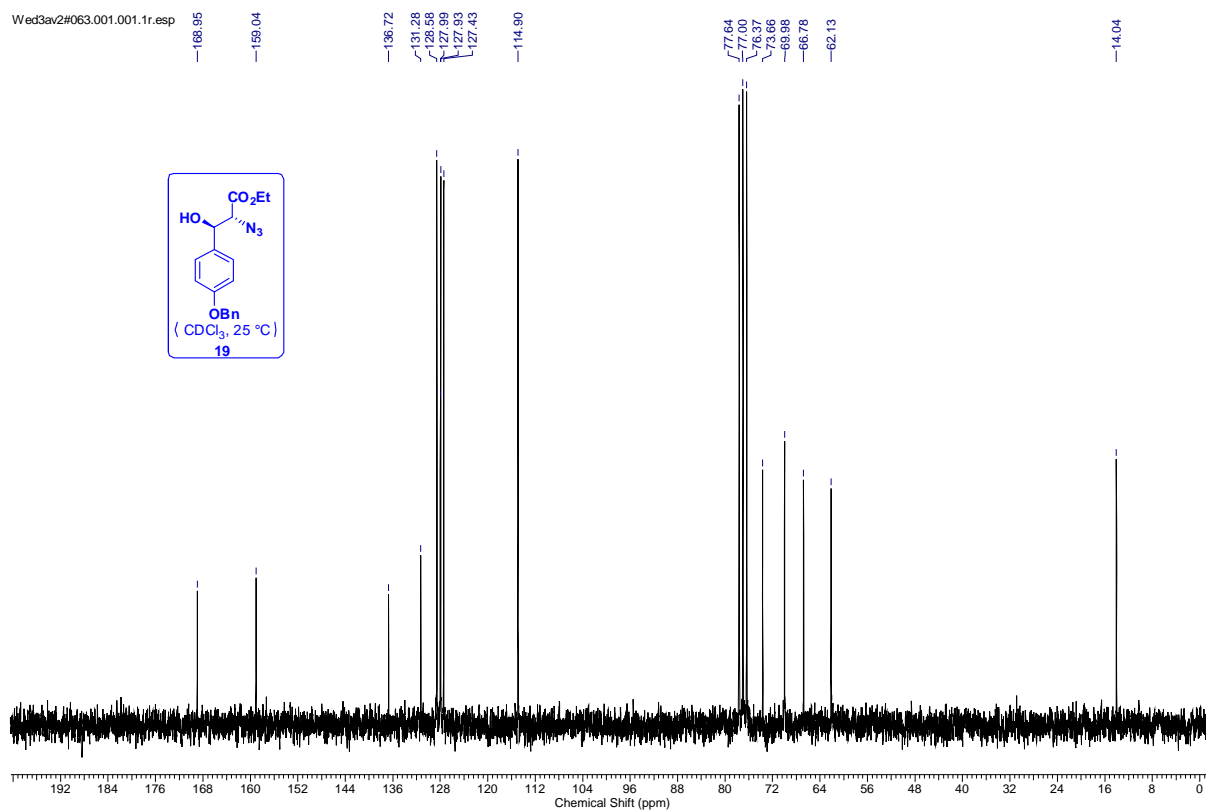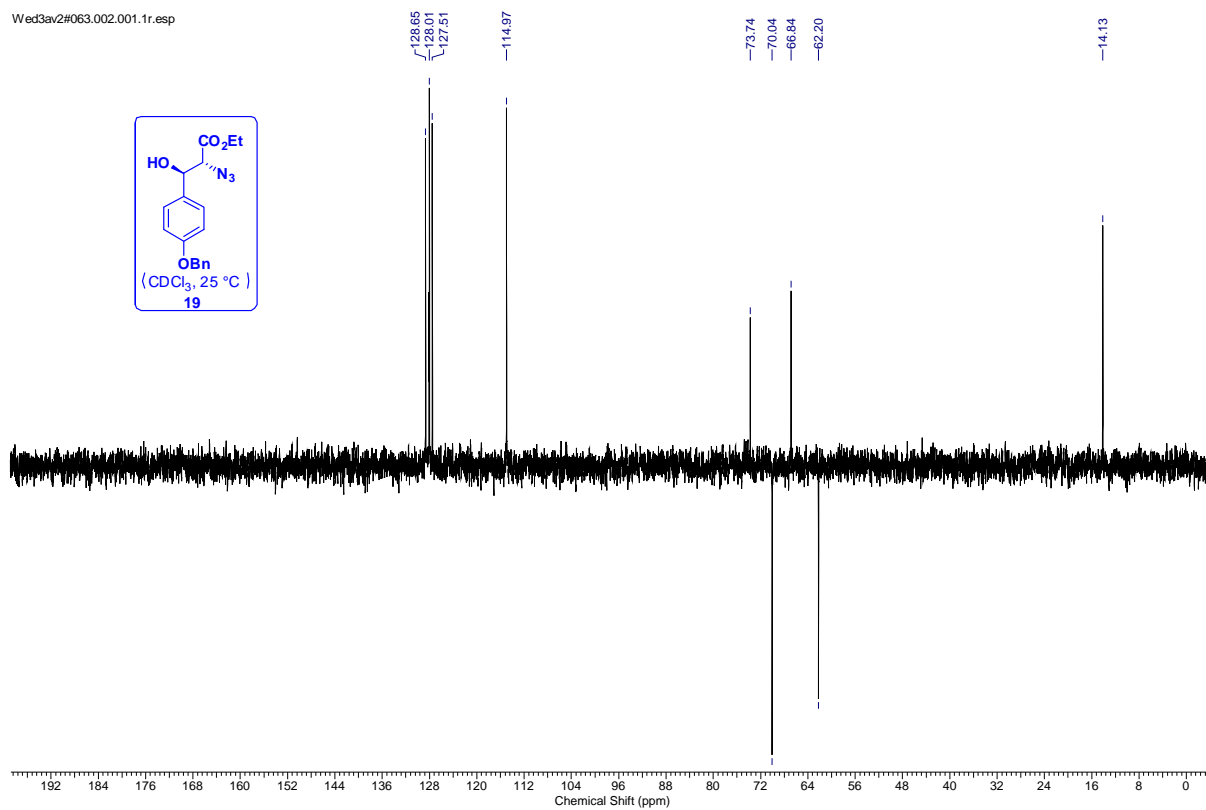



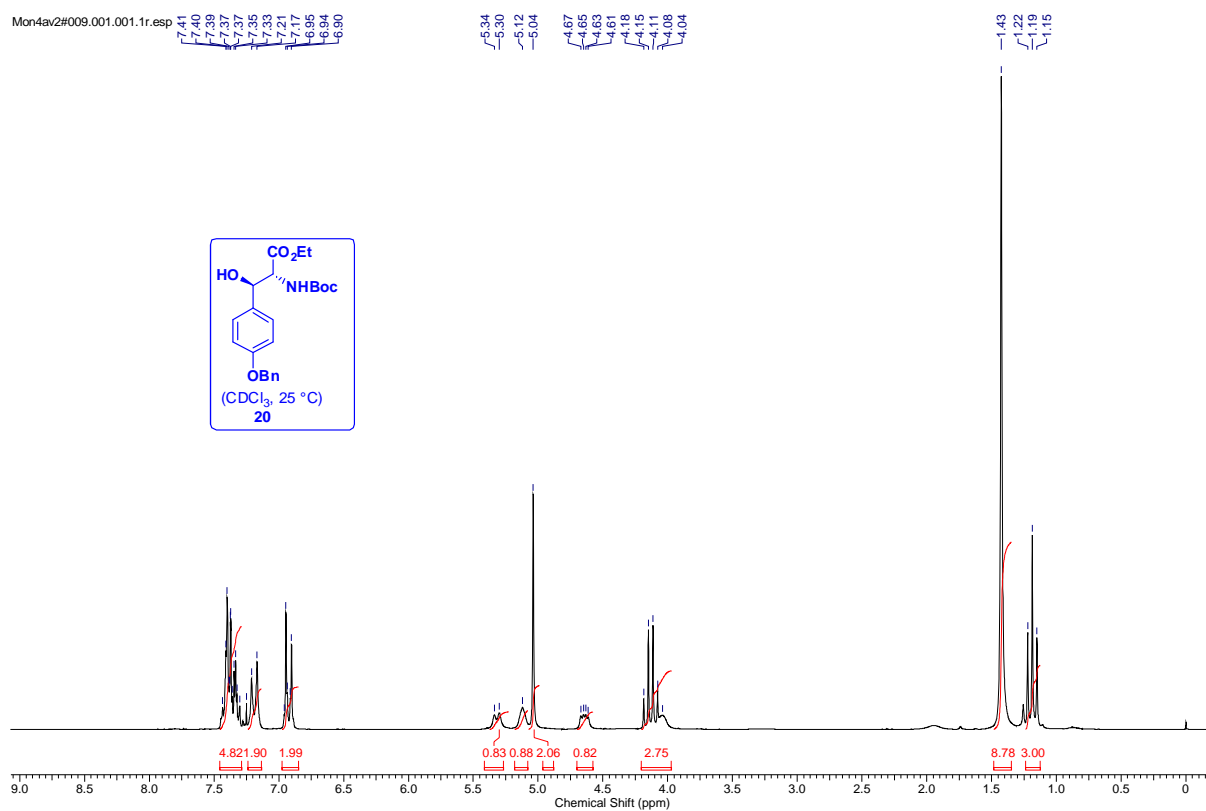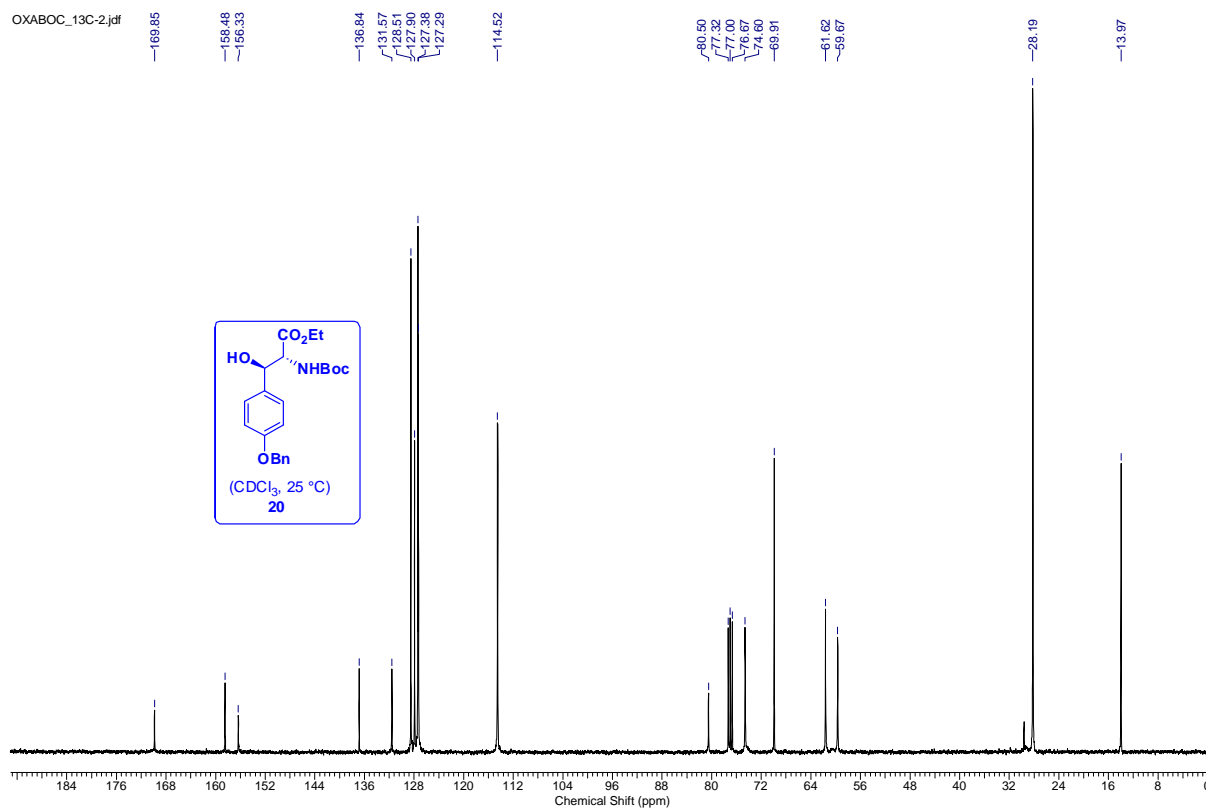

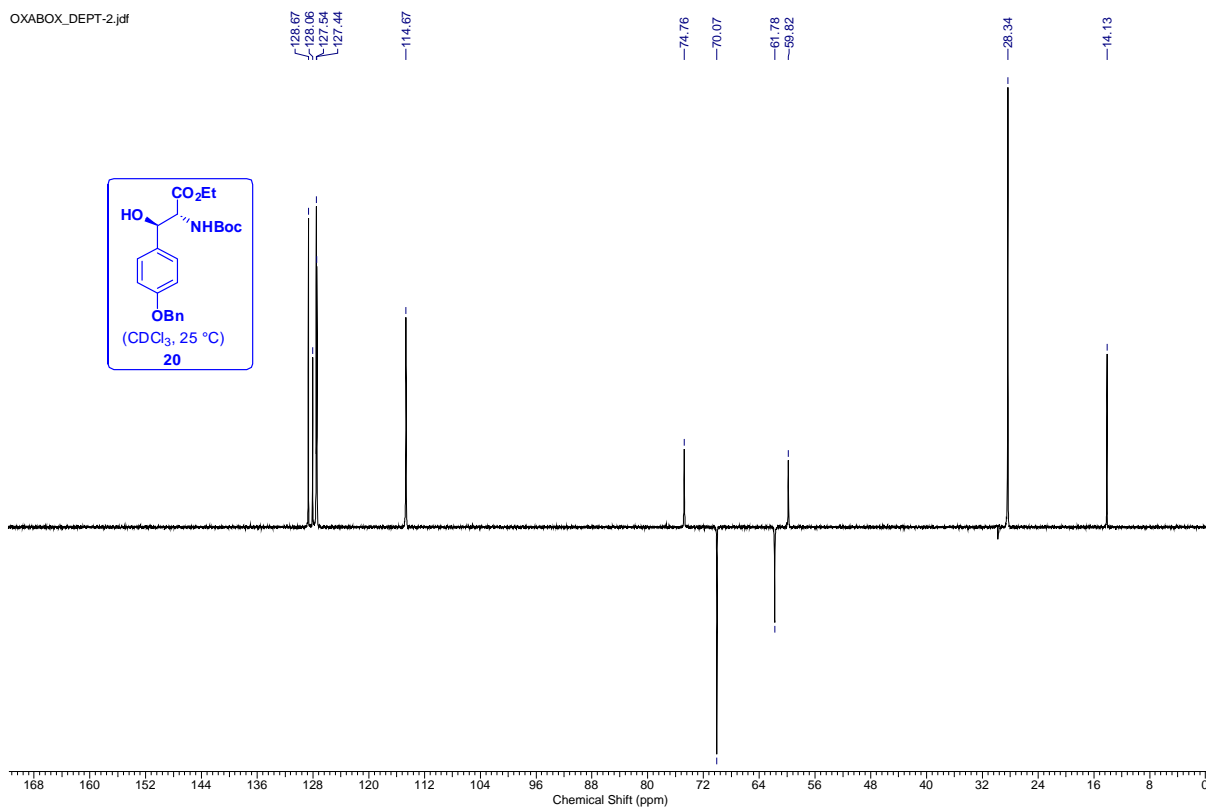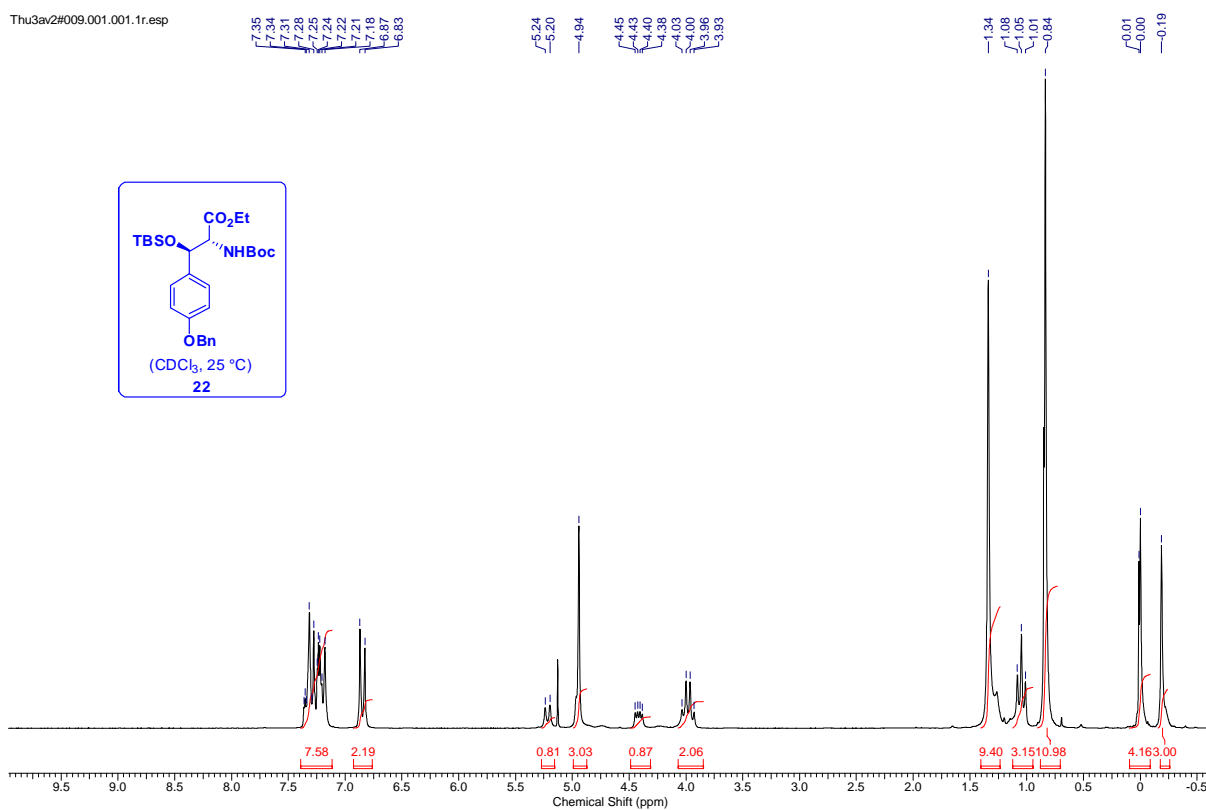

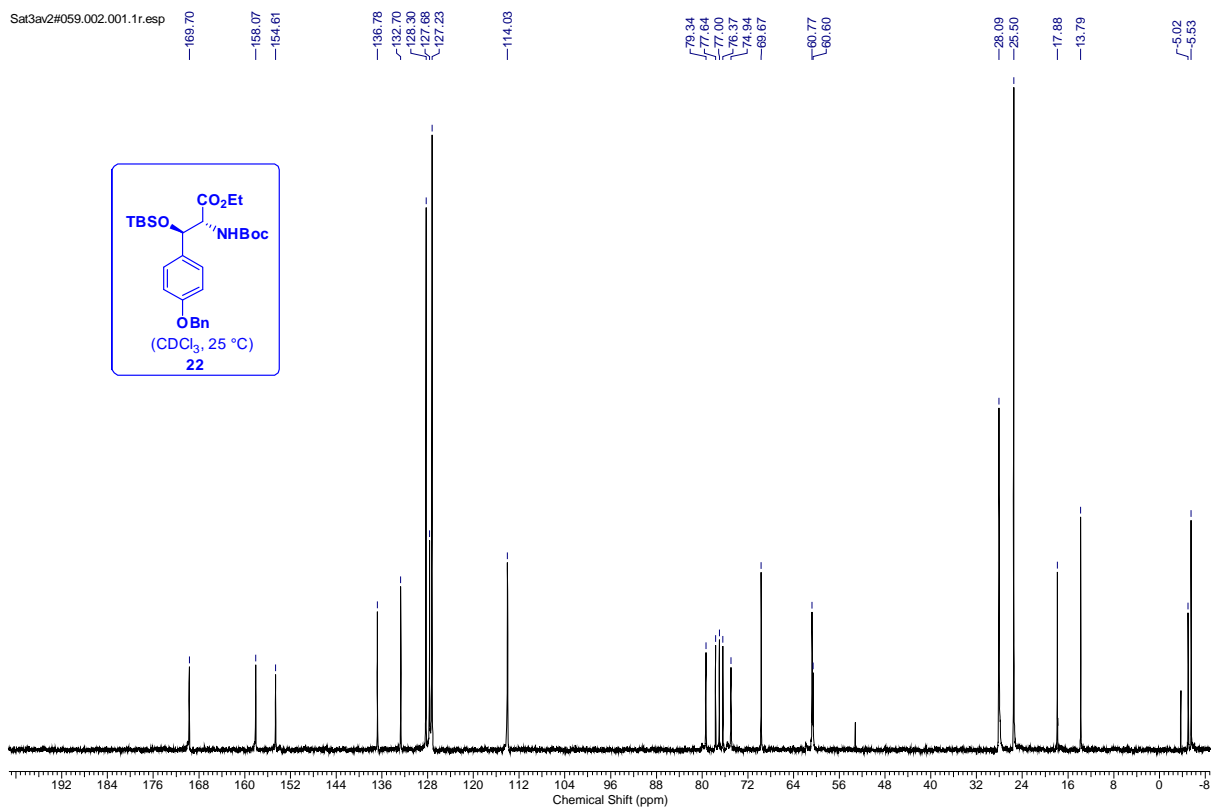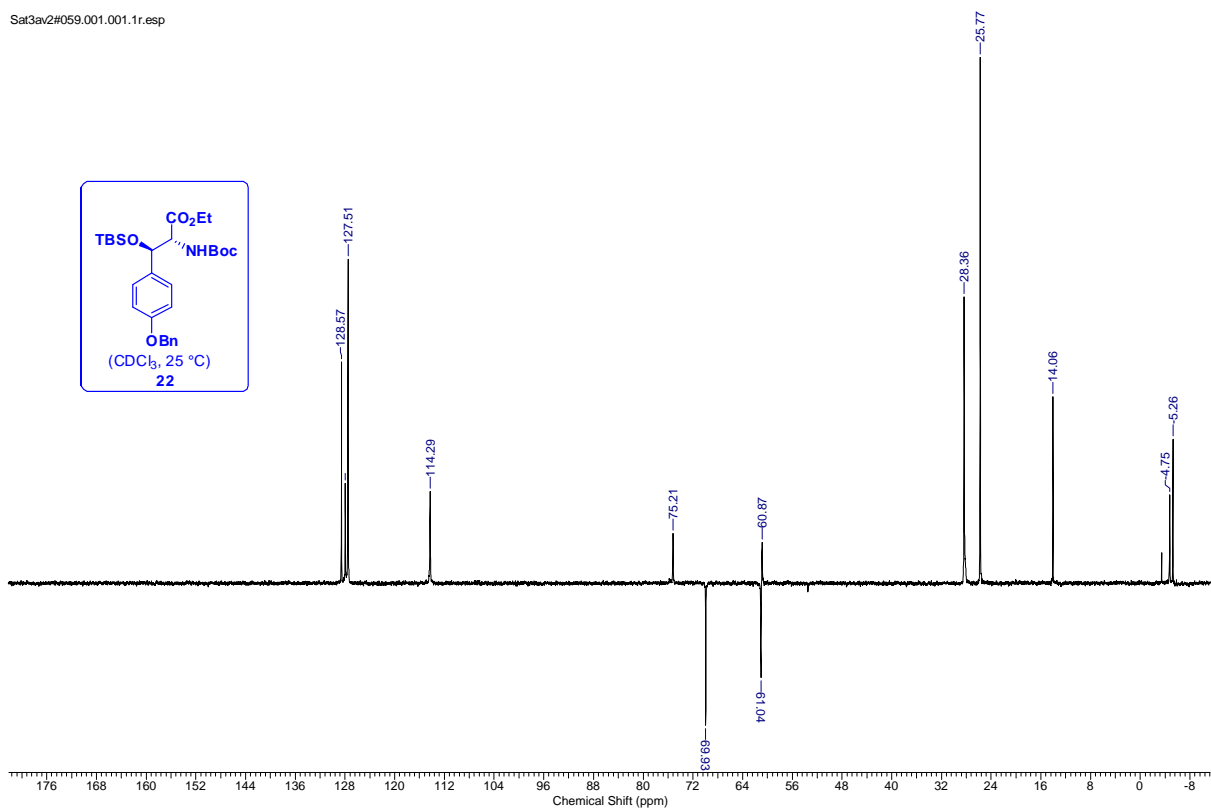

Thu3av2#008.001.001.1r.esp

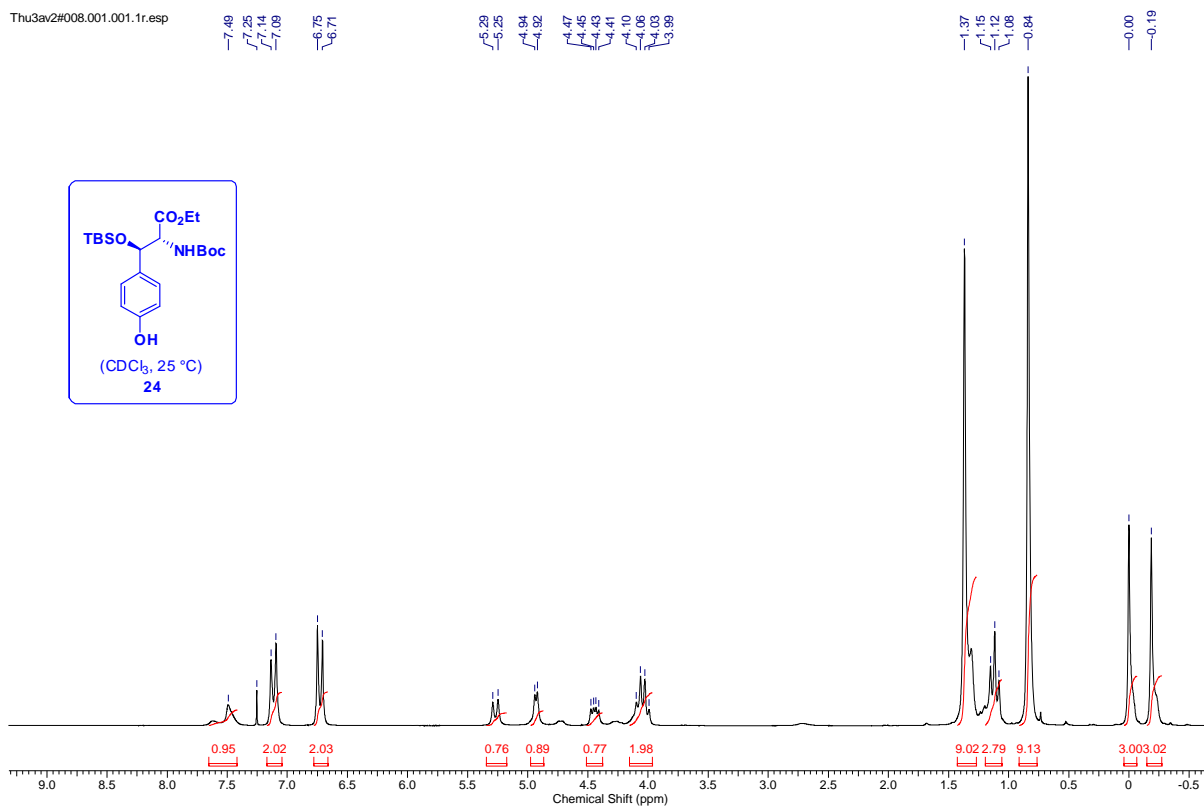

Sat3av2#057.002.001.1r.esp

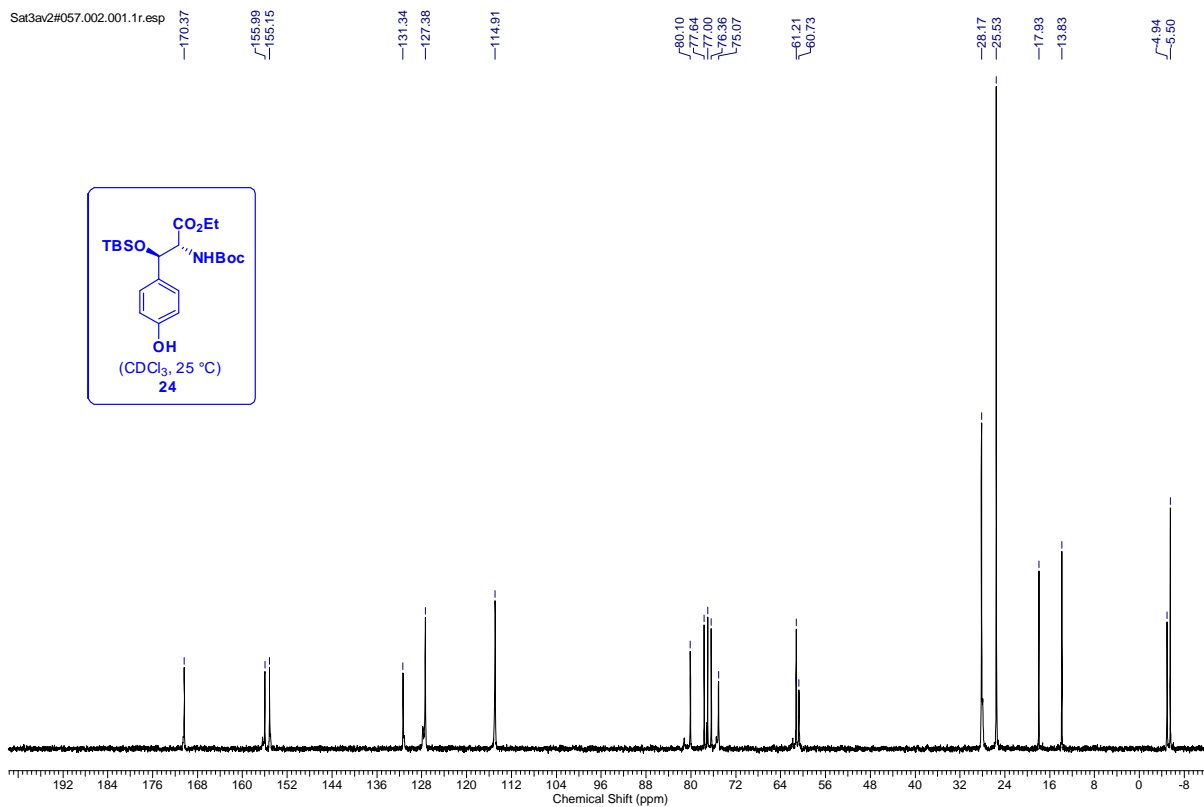

Sat3av2#057.001.001.1r.esp

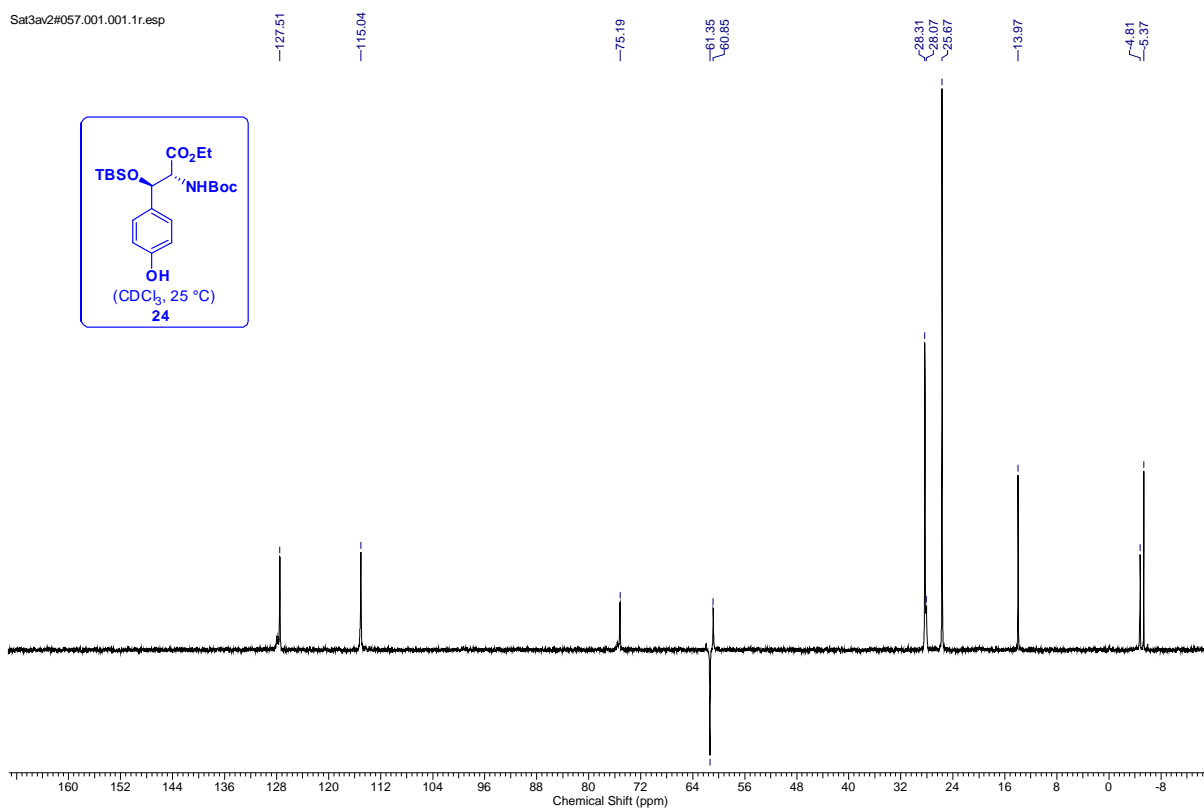

Fri3av2#014.001.001.1r.esp

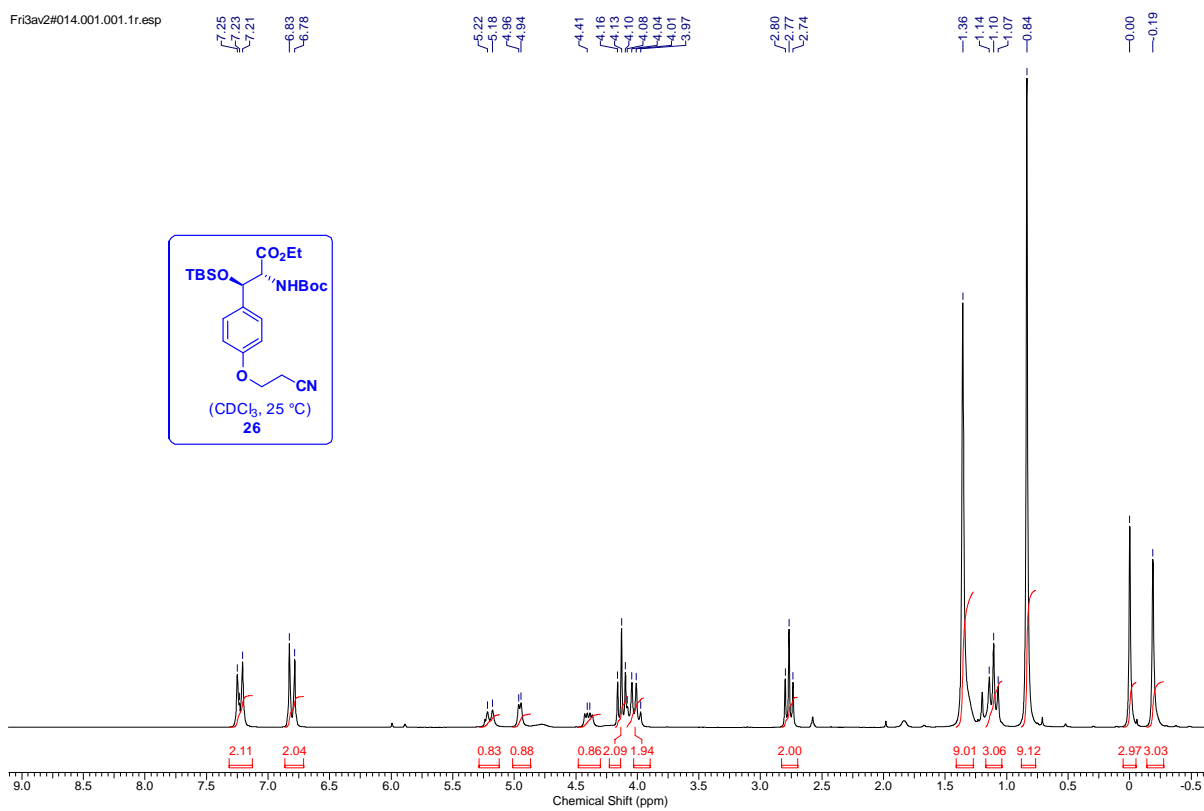

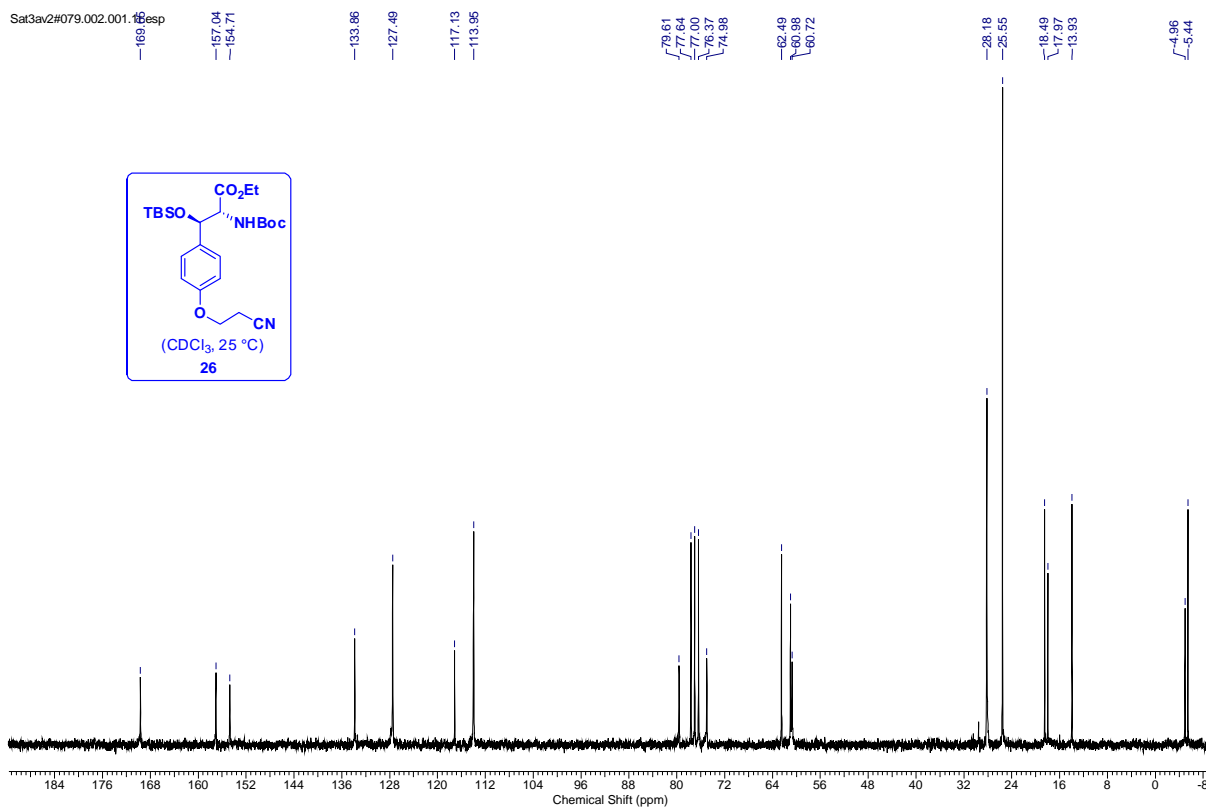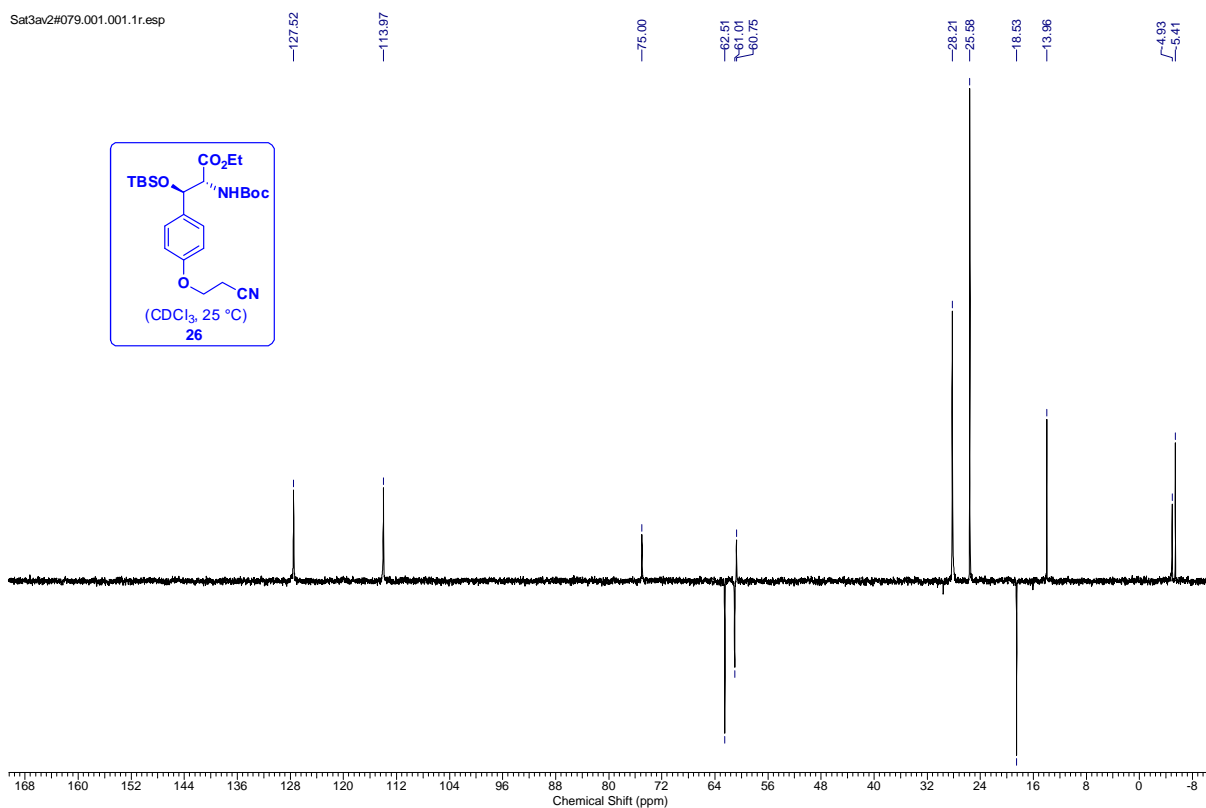

Sat3av2#011.001.001.1r.esp

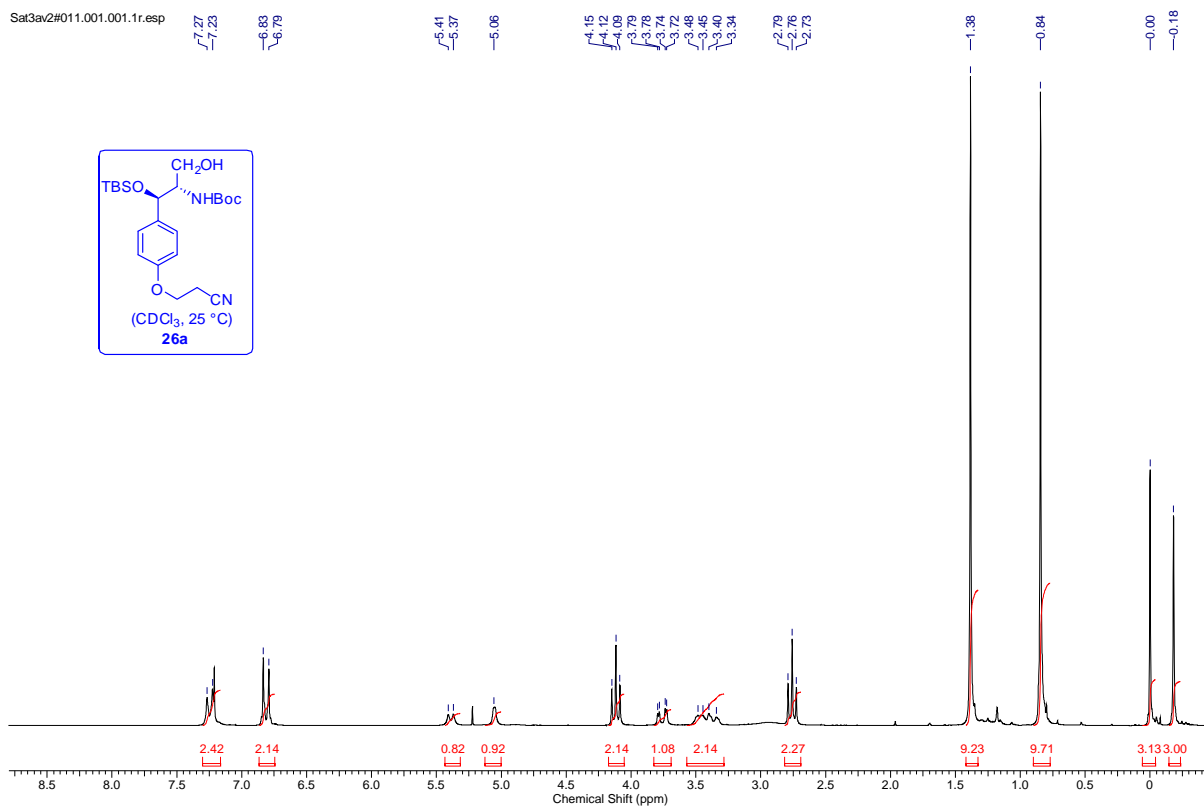

Tue3av2#073.002.001.1r.esp

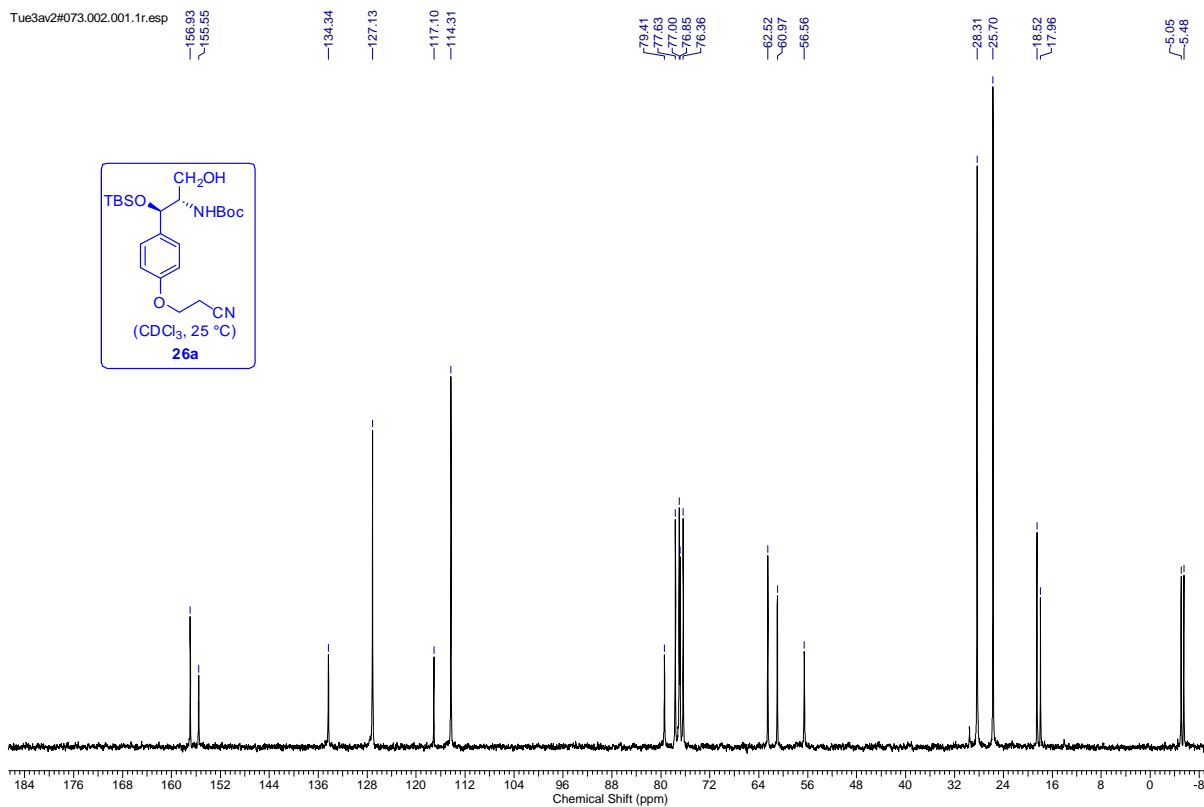

Tue3av2#073.001.001.1r.esp

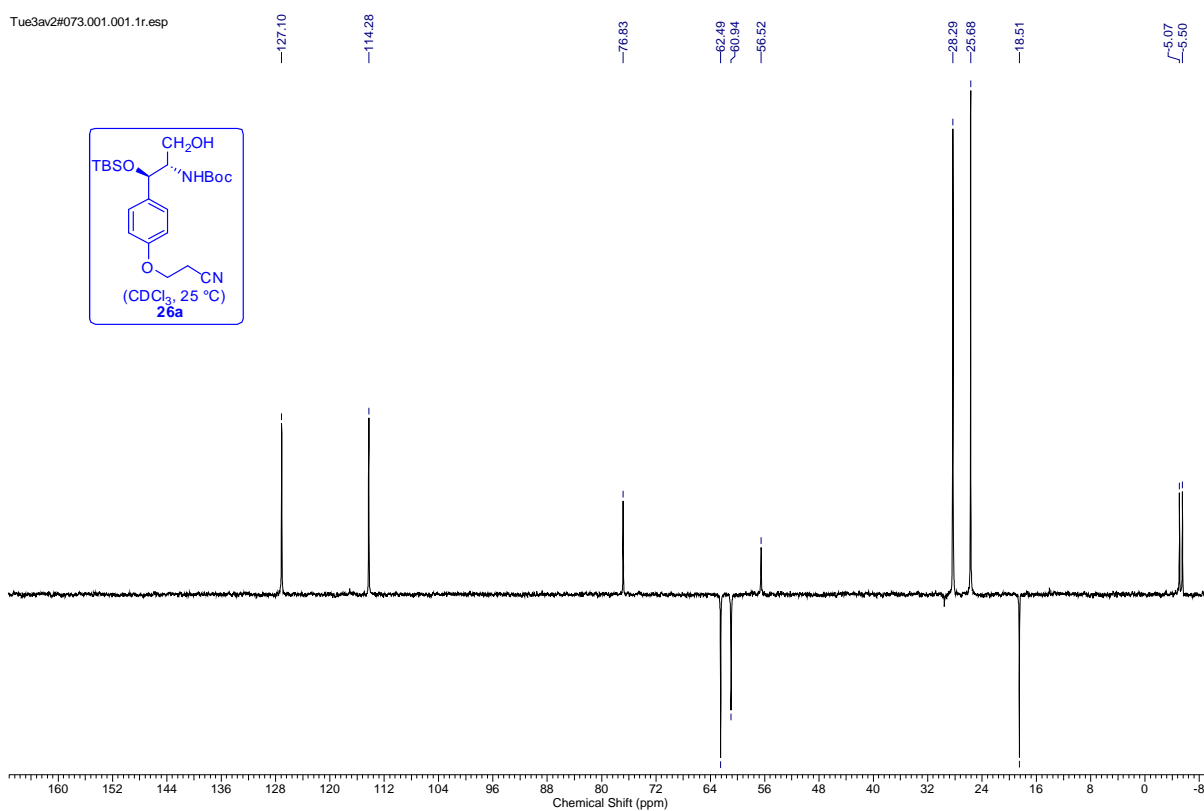

Thu1av2#001.001.001.1r.esp

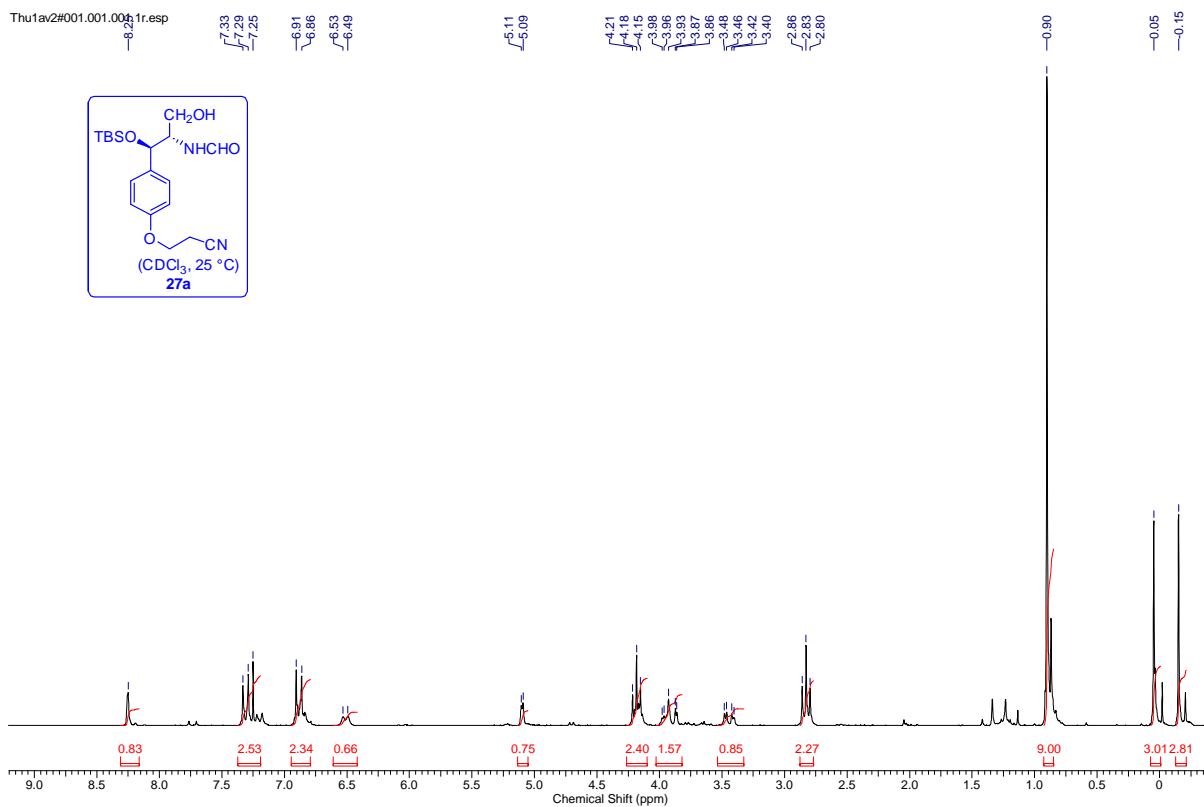



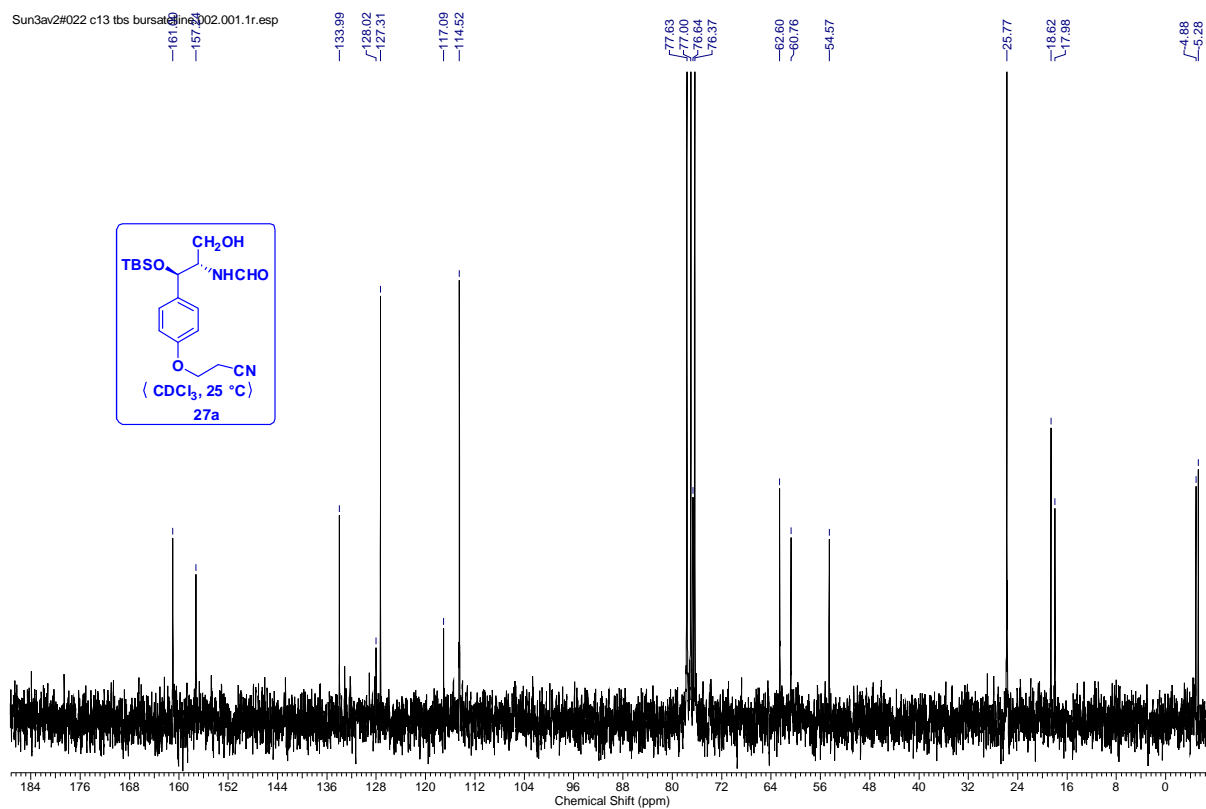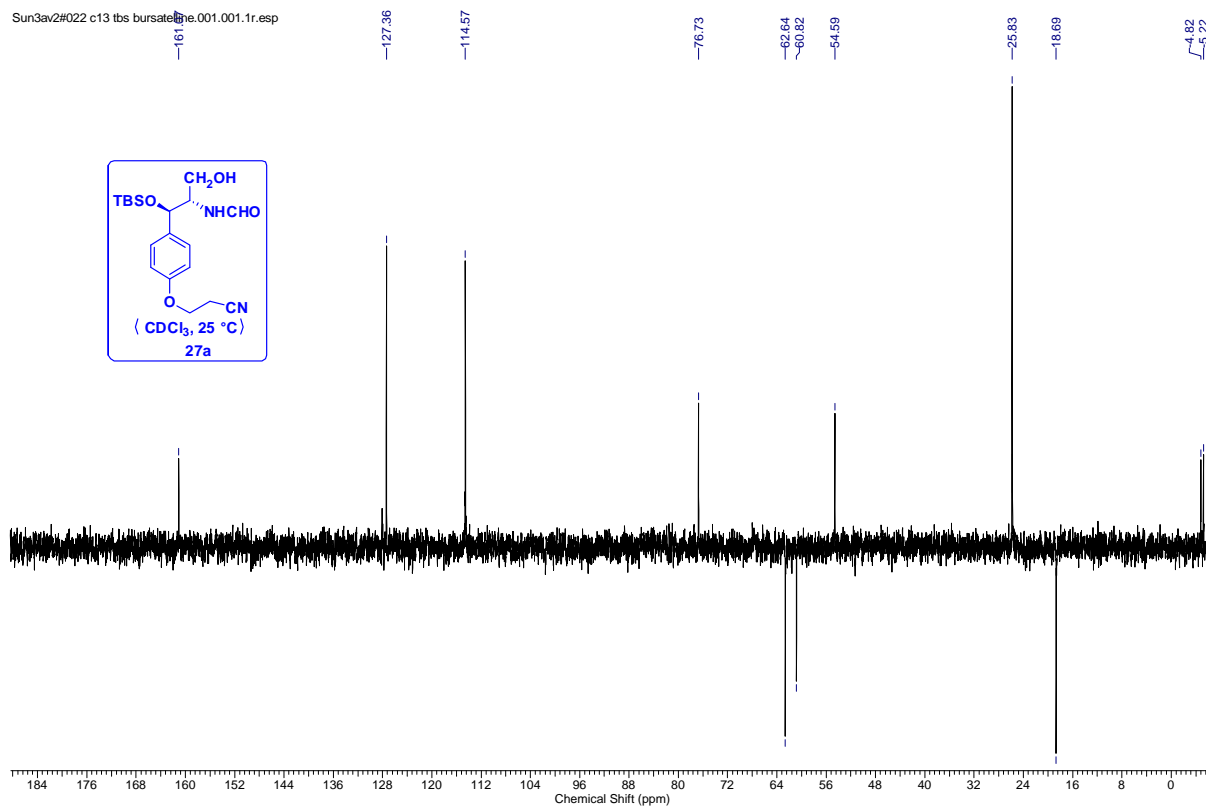

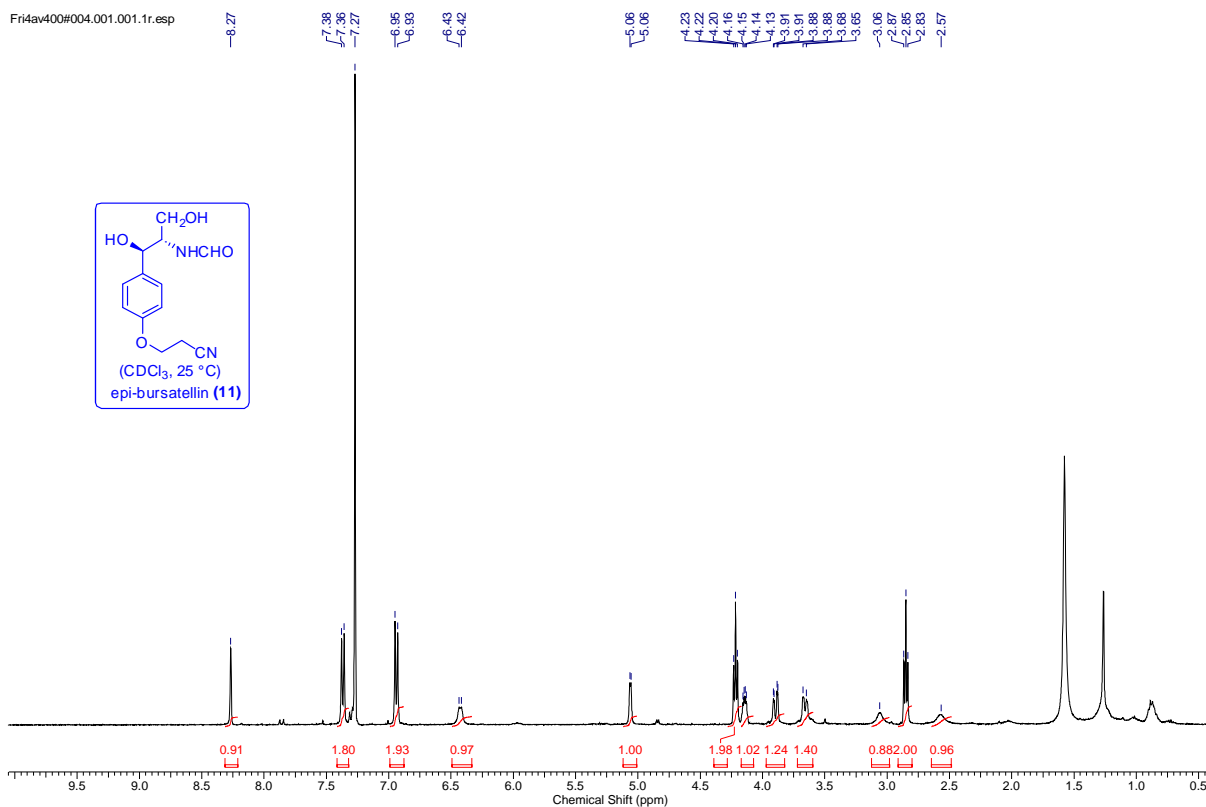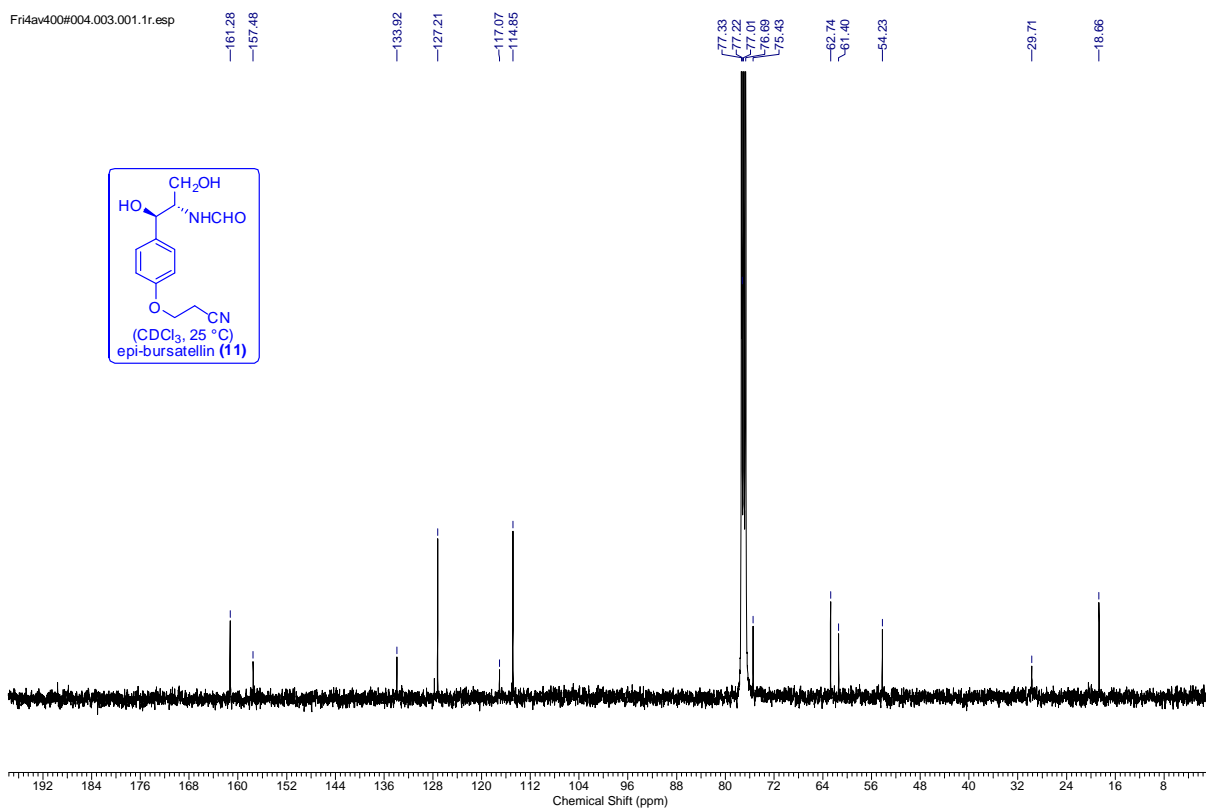

Fri4av400#004.002.001.1r.esp

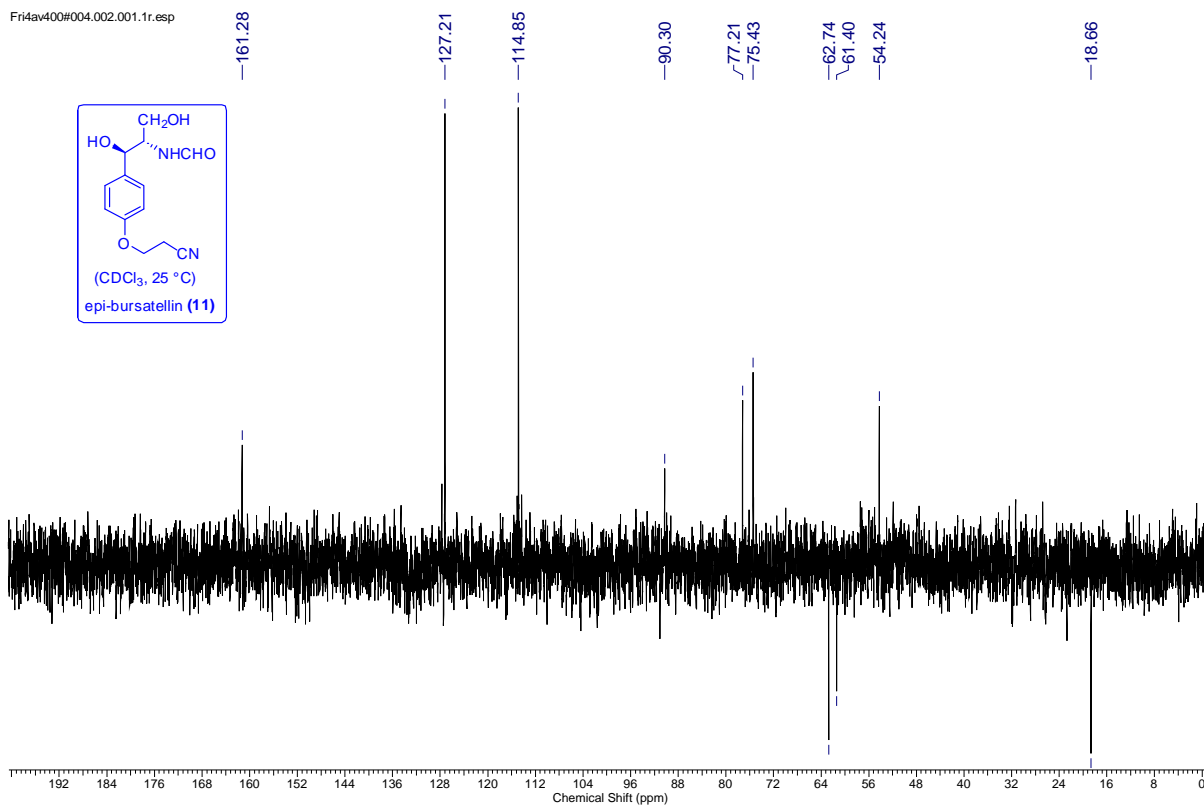

Mon4av2#010901.001.1r.esp

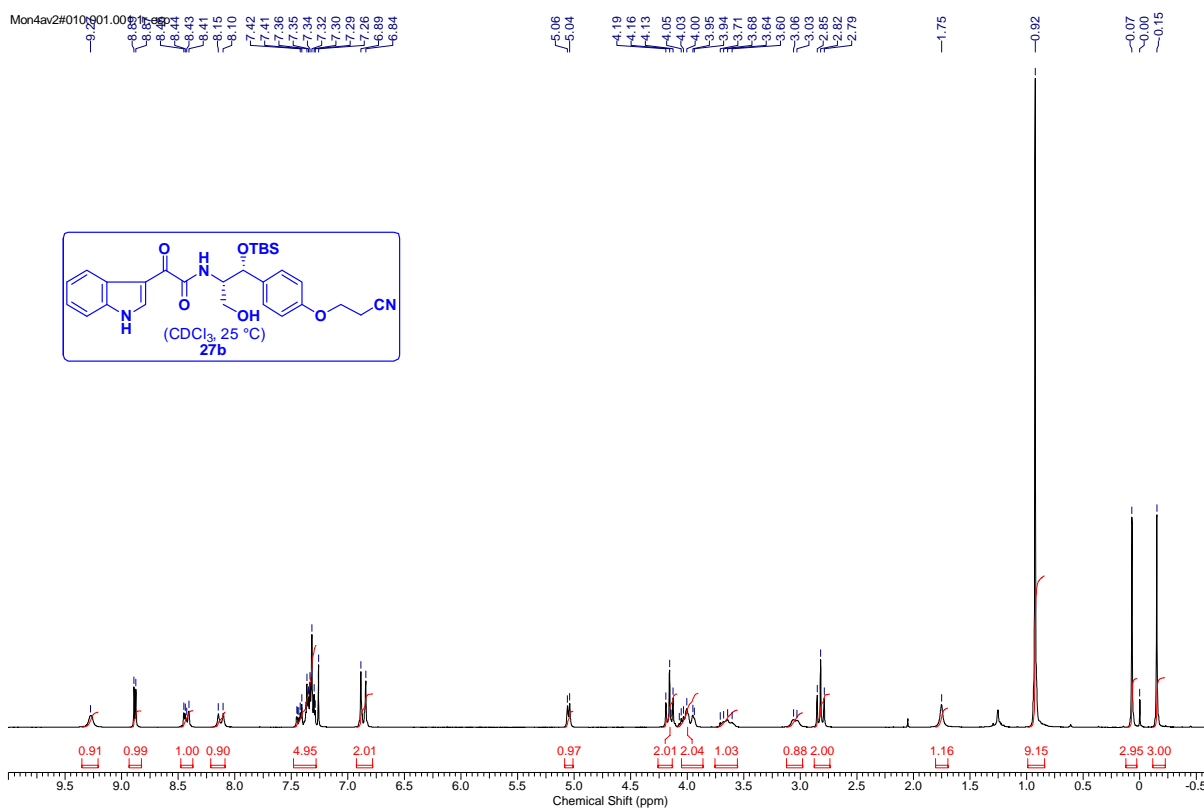

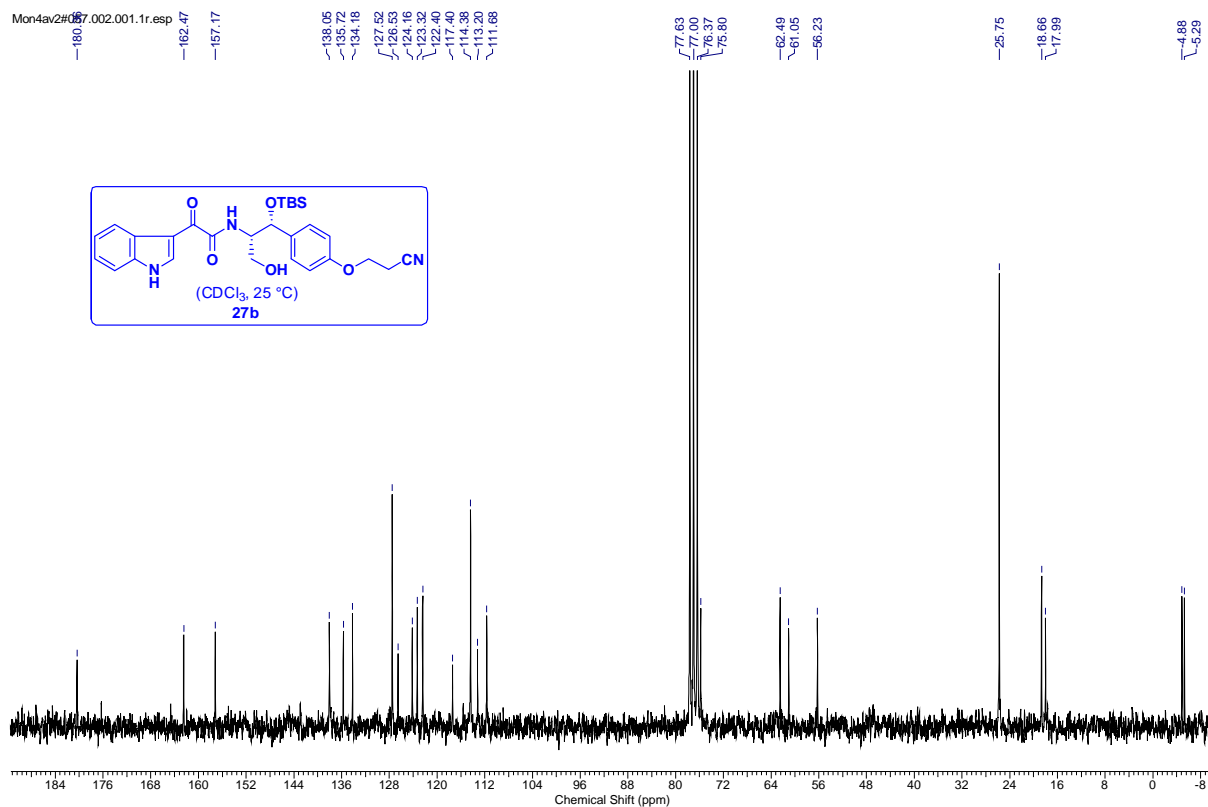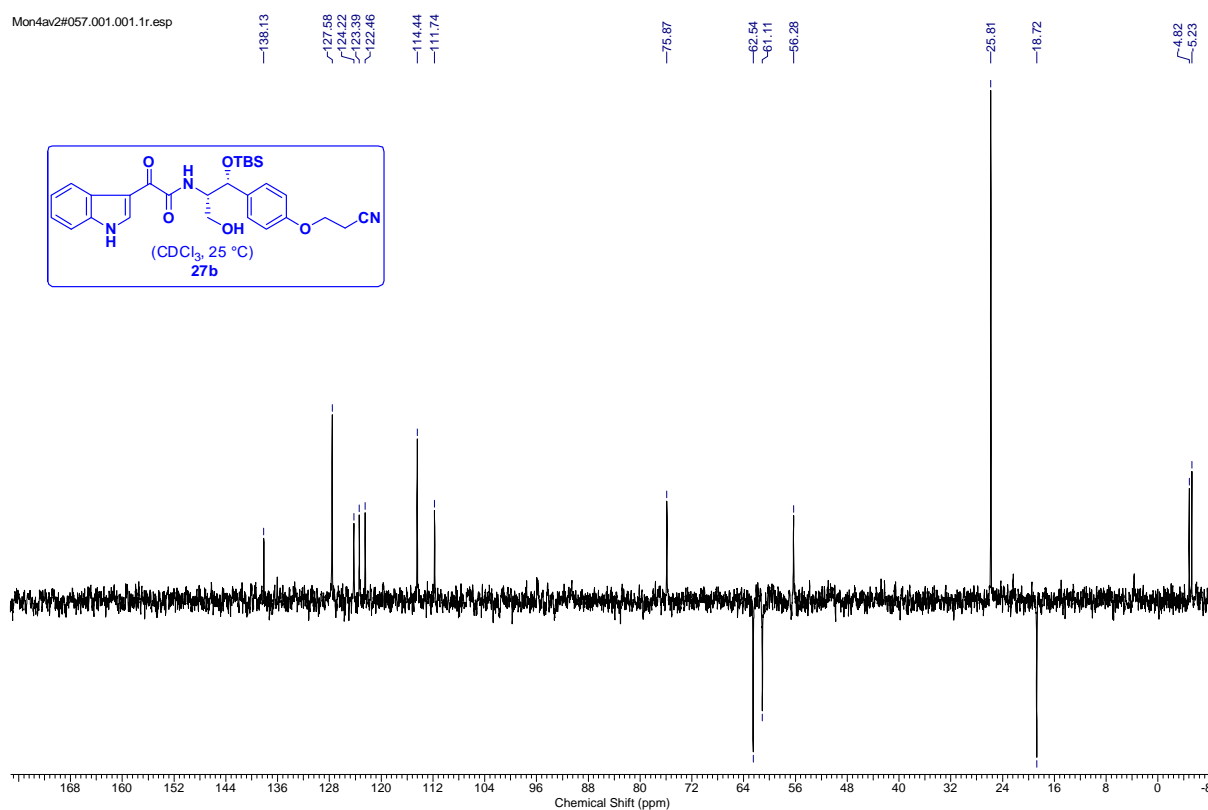

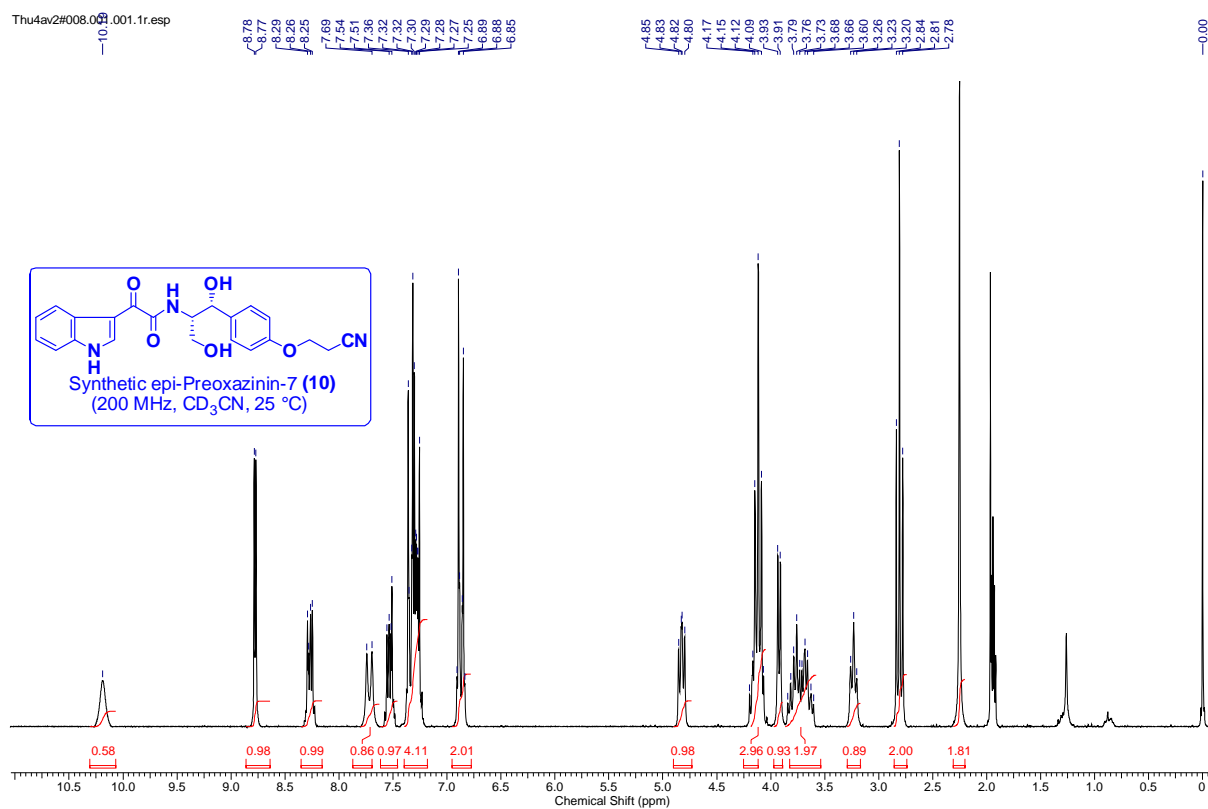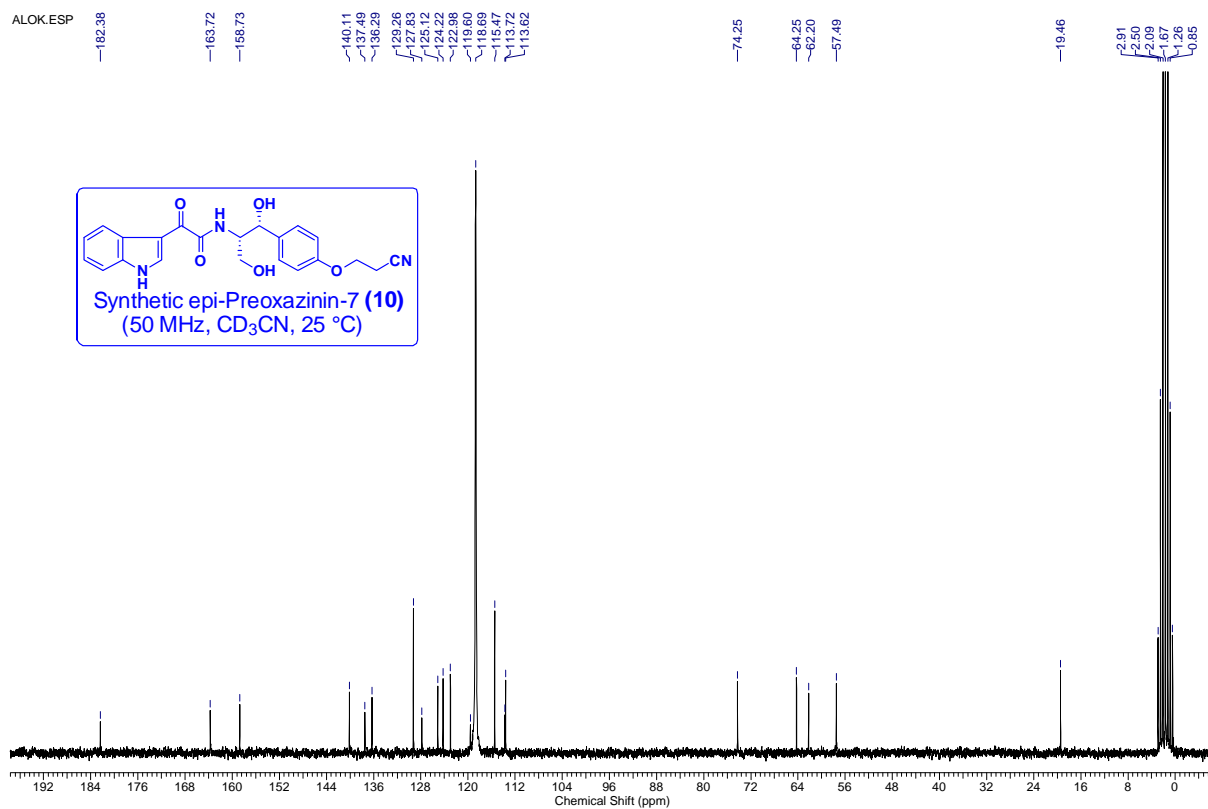

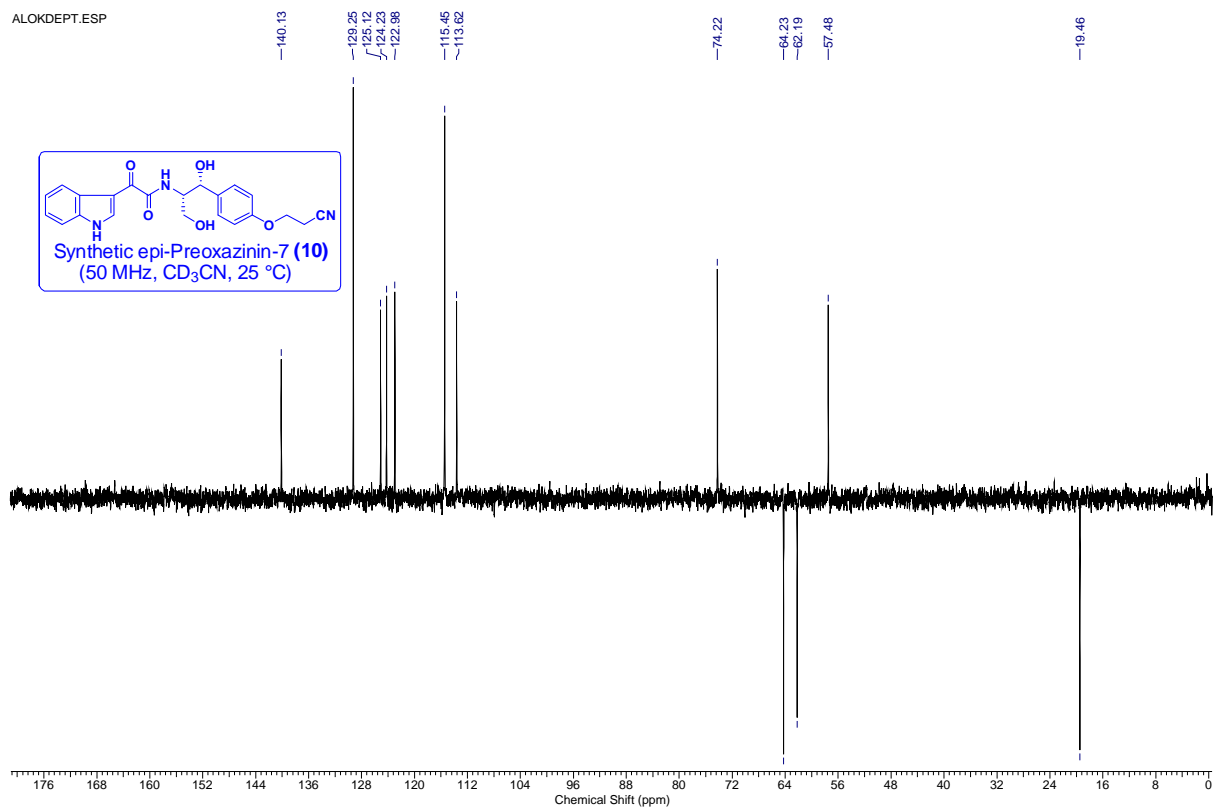

22 Dec 2010

| Acquisition Time (sec) | Comment              | AlcK/10997 | Date                  | 28/04/2010 11:04:28 |
|------------------------|----------------------|------------|-----------------------|---------------------|
| 7.9167                 | Nucleus              | 1H         | Original Points Count | 32768               |
| 200.13                 | Frequency (MHz)      |            | Points Count          | 32768               |
| 0.000                  | Temperature (grad C) |            | Sweep Width (Hz)      | 4139.07             |

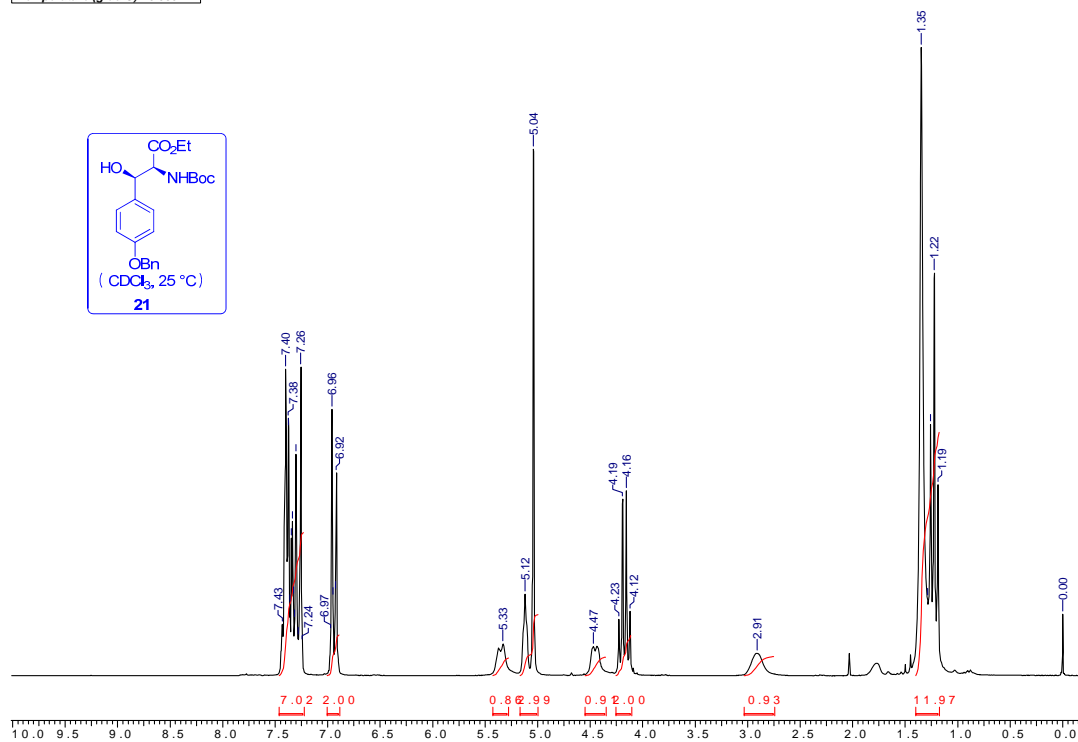

22 Dec 2010

|                        |        |         |            |                       |                     |
|------------------------|--------|---------|------------|-----------------------|---------------------|
| Acquisition Time (sec) | 2.7329 | Comment | Alok/10997 | Date                  | 01/05/2010 23:30:30 |
| Frequency (MHz)        | 50.32  | Nucleus | 13C        | Original Points Count | 32768               |
| Temperature (grad C)   | 0.000  |         |            | Points Count          | 32768               |
|                        |        |         |            | Sweep Width (Hz)      | 11990.41            |

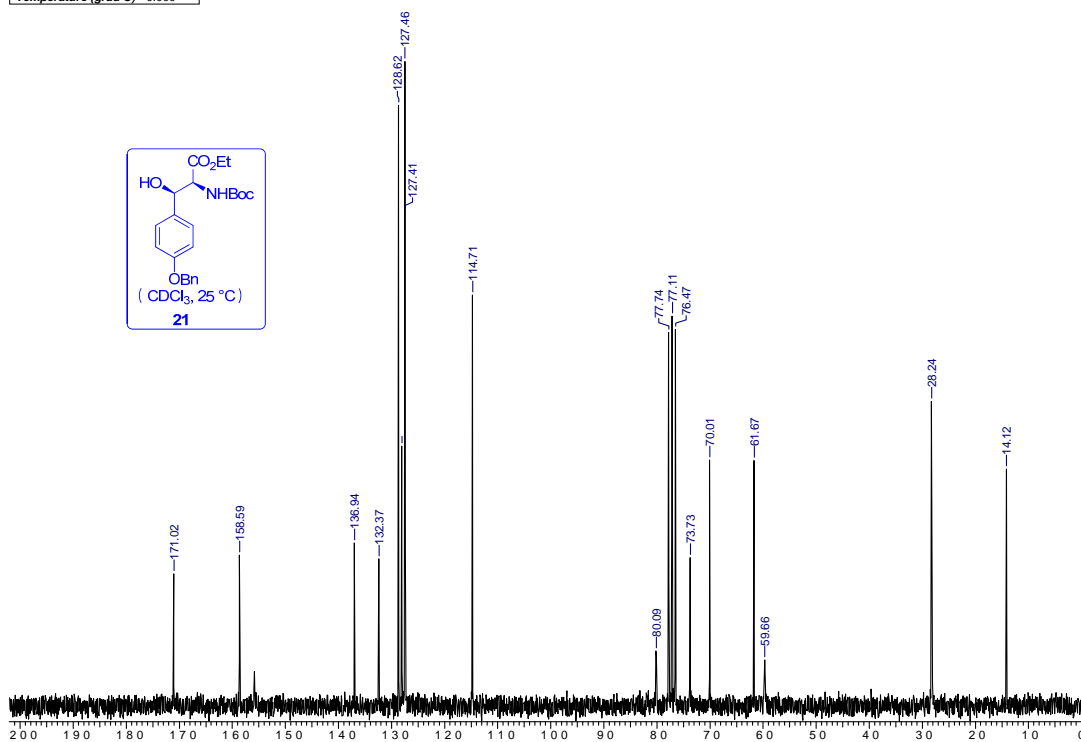

22 Dec 2010

|                        |        |         |            |                       |                     |
|------------------------|--------|---------|------------|-----------------------|---------------------|
| Acquisition Time (sec) | 2.7329 | Comment | Alok/10997 | Date                  | 01/05/2010 23:11:08 |
| Frequency (MHz)        | 50.32  | Nucleus | 13C        | Original Points Count | 32768               |
| Temperature (grad C)   | 0.000  |         |            | Points Count          | 32768               |
|                        |        |         |            | Sweep Width (Hz)      | 11990.41            |

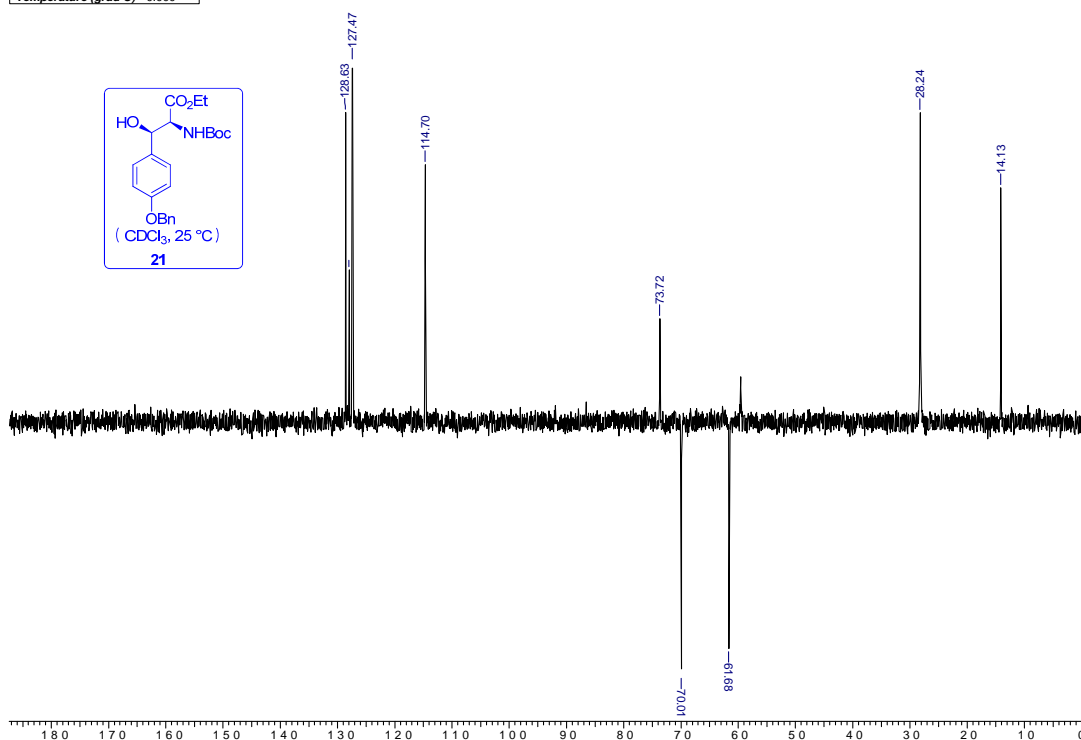

22 Dec 2010

|                        |        |         |                |                       |                     |
|------------------------|--------|---------|----------------|-----------------------|---------------------|
| Acquisition Time (sec) | 7.9167 | Comment | Alok10997      | Date                  | 01/07/2010 15:37:50 |
| Frequency (MHz)        | 200.13 | Nucleus | <sup>1</sup> H | Original Points Count | 32768               |
| Temperature (grad C)   | 0.000  |         |                | Points Count          | 32768               |
|                        |        |         |                | Sweep Width (Hz)      | 4139.07             |

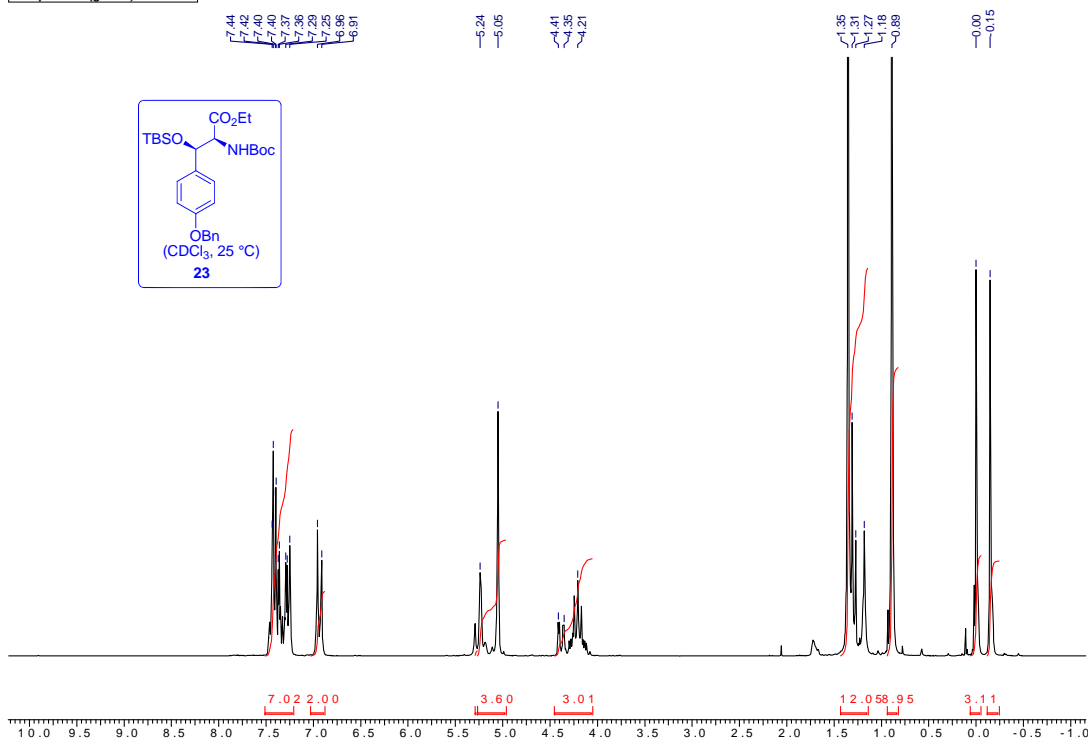

22 Dec 2010

|                        |        |         |                 |                       |                     |
|------------------------|--------|---------|-----------------|-----------------------|---------------------|
| Acquisition Time (sec) | 2.7329 | Comment | Alok Ranjan     | Date                  | 18/04/2010 05:15:18 |
| Frequency (MHz)        | 50.32  | Nucleus | <sup>13</sup> C | Original Points Count | 32768               |
| Temperature (grad C)   | 0.000  |         |                 | Points Count          | 32768               |
|                        |        |         |                 | Sweep Width (Hz)      | 11990.41            |

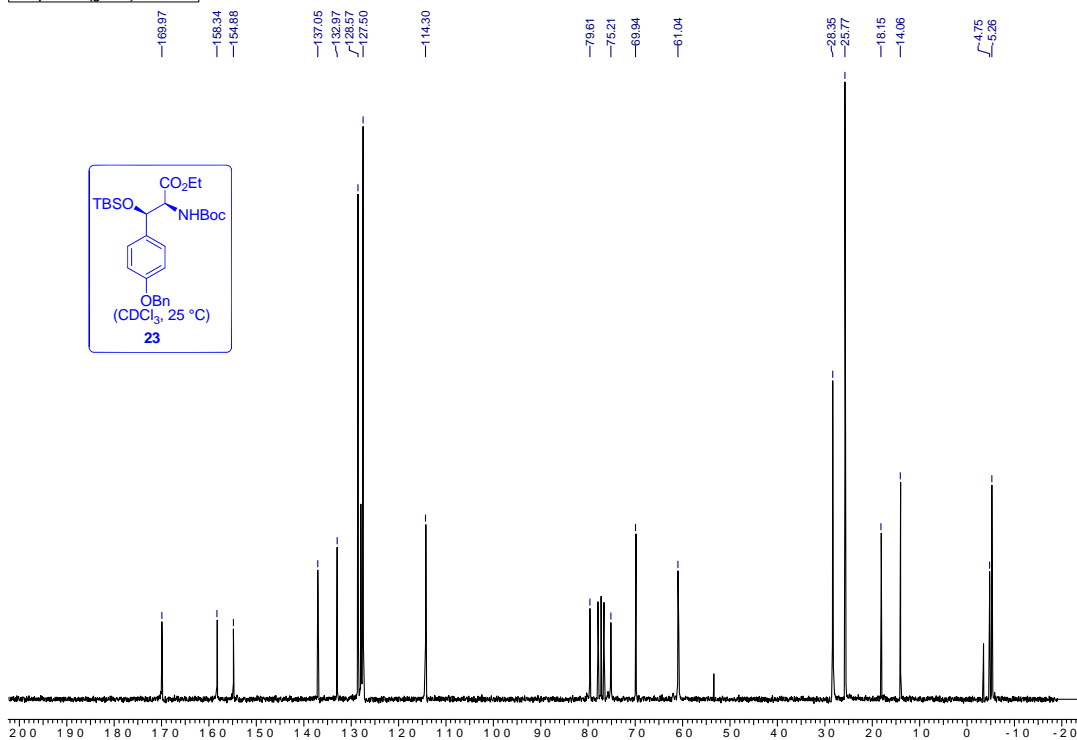



22 Dec 2010

|                        |        |         |             |                       |                     |
|------------------------|--------|---------|-------------|-----------------------|---------------------|
| Acquisition Time (sec) | 2.7329 | Comment | Alok Ranjan | Date                  | 18/04/2010 04:55:30 |
| Frequency (MHz)        | 50.32  | Nucleus | 13C         | Original Points Count | 32768               |
| Temperature (grad C)   | 0.000  |         |             | Points Count          | 32768               |
|                        |        |         |             | Sweep Width (Hz)      | 11990.41            |

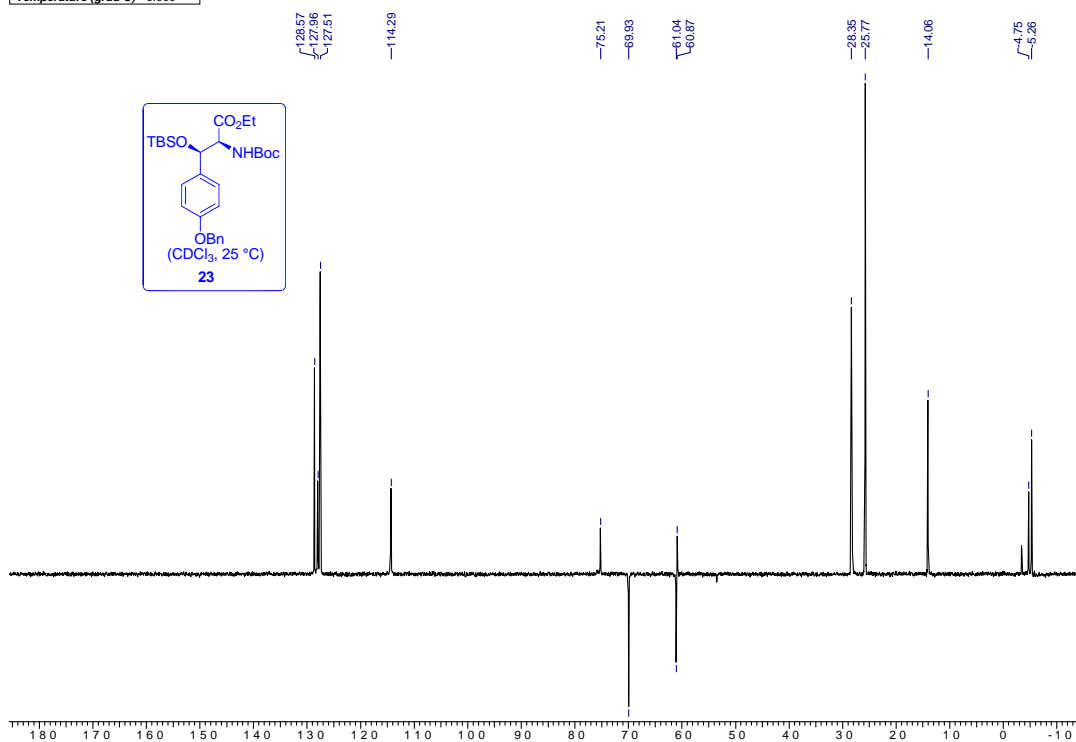

28 May 2011  
 Alok/10997 (303K)

|                        |        |         |                   |                       |                     |
|------------------------|--------|---------|-------------------|-----------------------|---------------------|
| Acquisition Time (sec) | 3.9846 | Comment | Alok/10997 (303K) | Date                  | 16/01/2011 16:21:56 |
| Frequency (MHz)        | 400.13 | Nucleus | 1H                | Original Points Count | 32768               |
| Temperature (grad C)   | 0.000  |         |                   | Points Count          | 32768               |
|                        |        |         |                   | Sweep Width (Hz)      | 8223.68             |

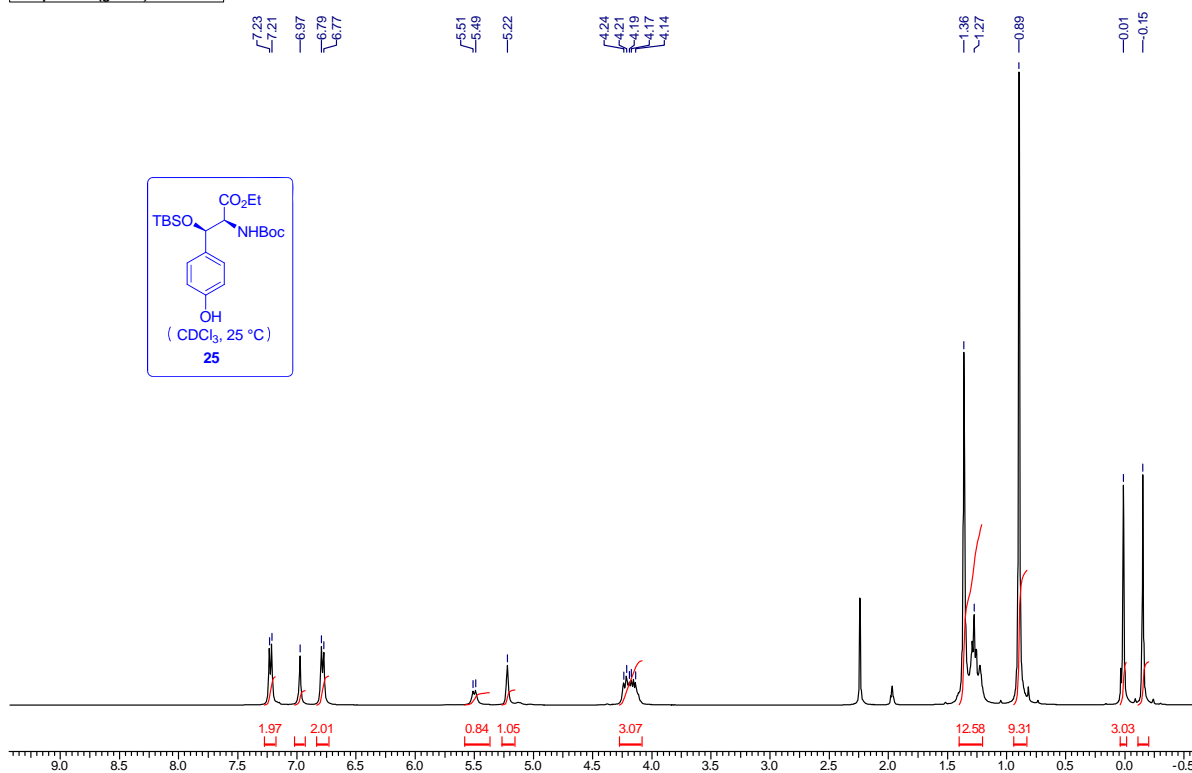

Z:\AV400\JAN\_11-1\SUN4AV-1\2\data\11r

22 Dec 2010

|                        |        |              |                     |                  |          |                      |       |
|------------------------|--------|--------------|---------------------|------------------|----------|----------------------|-------|
| Acquisition Time (sec) | 1.3631 | Date         | 22/12/2010 20:26:28 | Frequency (MHz)  | 100.61   | Nucleus              | 13C   |
| Original Points Count  | 32768  | Points Count | 32768               | Sweep Width (Hz) | 24038.46 | Temperature (grad C) | 0.000 |

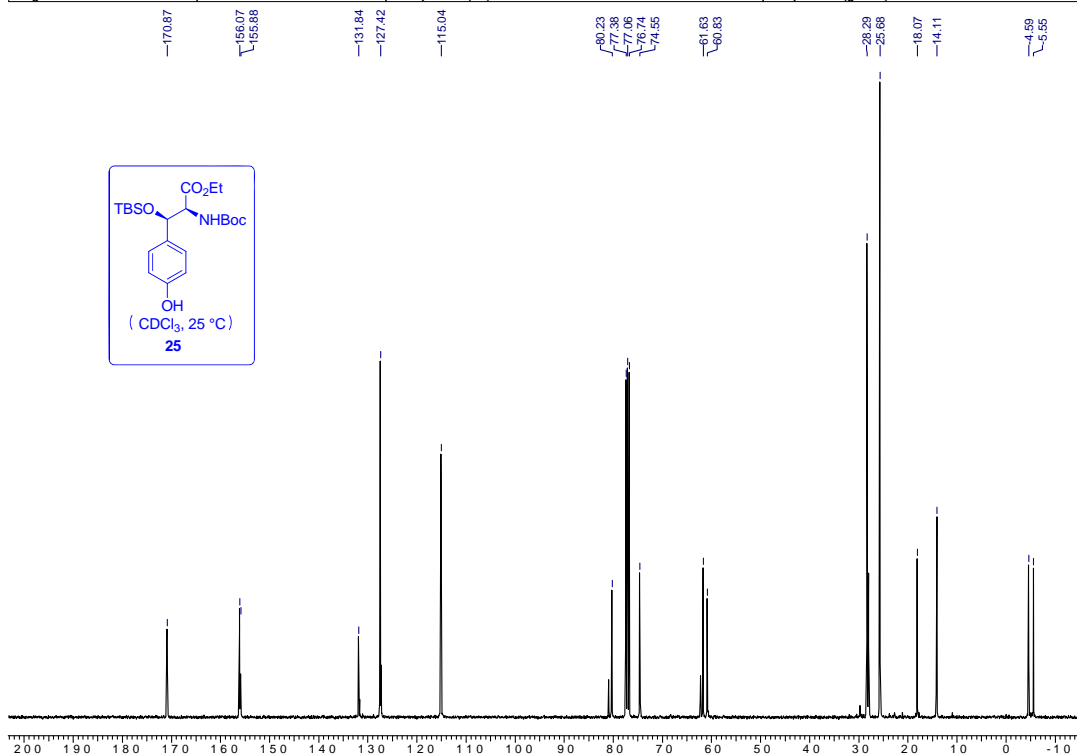

22 Dec 2010

|                        |        |              |                     |                  |          |                      |       |
|------------------------|--------|--------------|---------------------|------------------|----------|----------------------|-------|
| Acquisition Time (sec) | 1.3631 | Date         | 09/07/2010 18:45:58 | Frequency (MHz)  | 100.61   | Nucleus              | 13C   |
| Original Points Count  | 32768  | Points Count | 32768               | Sweep Width (Hz) | 24038.46 | Temperature (grad C) | 0.000 |

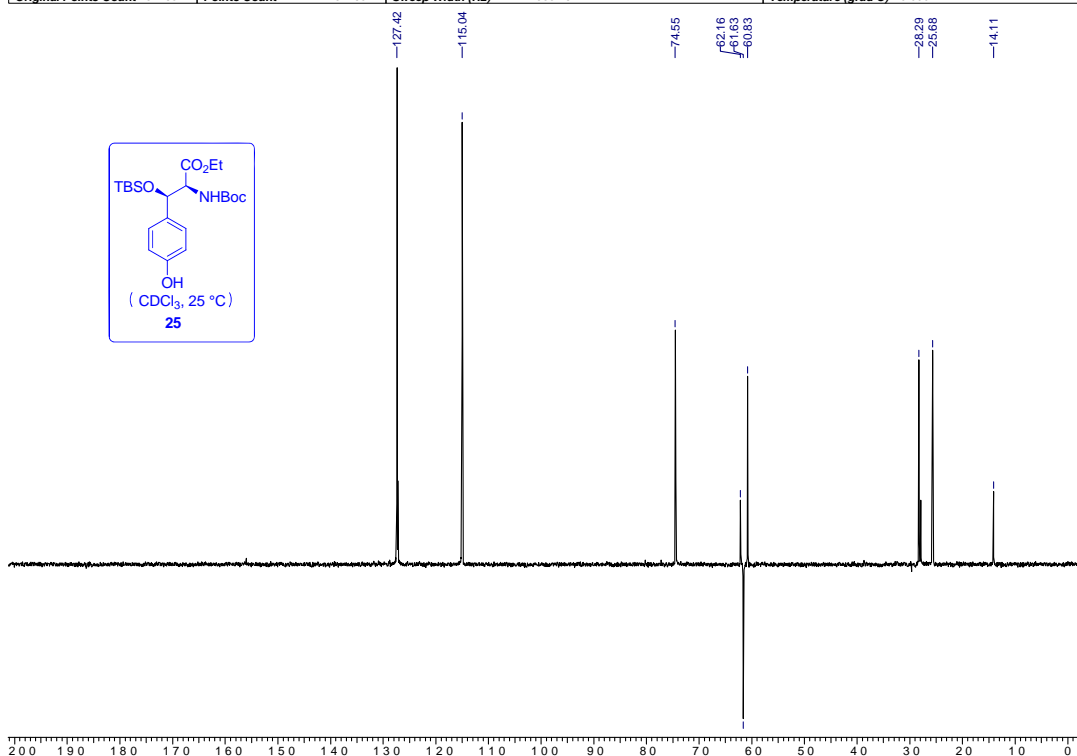

2 May 2011  
 Alok/10997

|                        |        |         |            |                       |                     |
|------------------------|--------|---------|------------|-----------------------|---------------------|
| Acquisition Time (sec) | 7.9167 | Comment | Alok/10997 | Date                  | 28/04/2011 10:47:56 |
| Frequency (MHz)        | 200.13 | Nucleus | 1H         | Original Points Count | 32768               |
| Temperature (grad C)   | 0.000  |         |            | Points Count          | 32768               |
|                        |        |         |            | Sweep Width (Hz)      | 4139.07             |

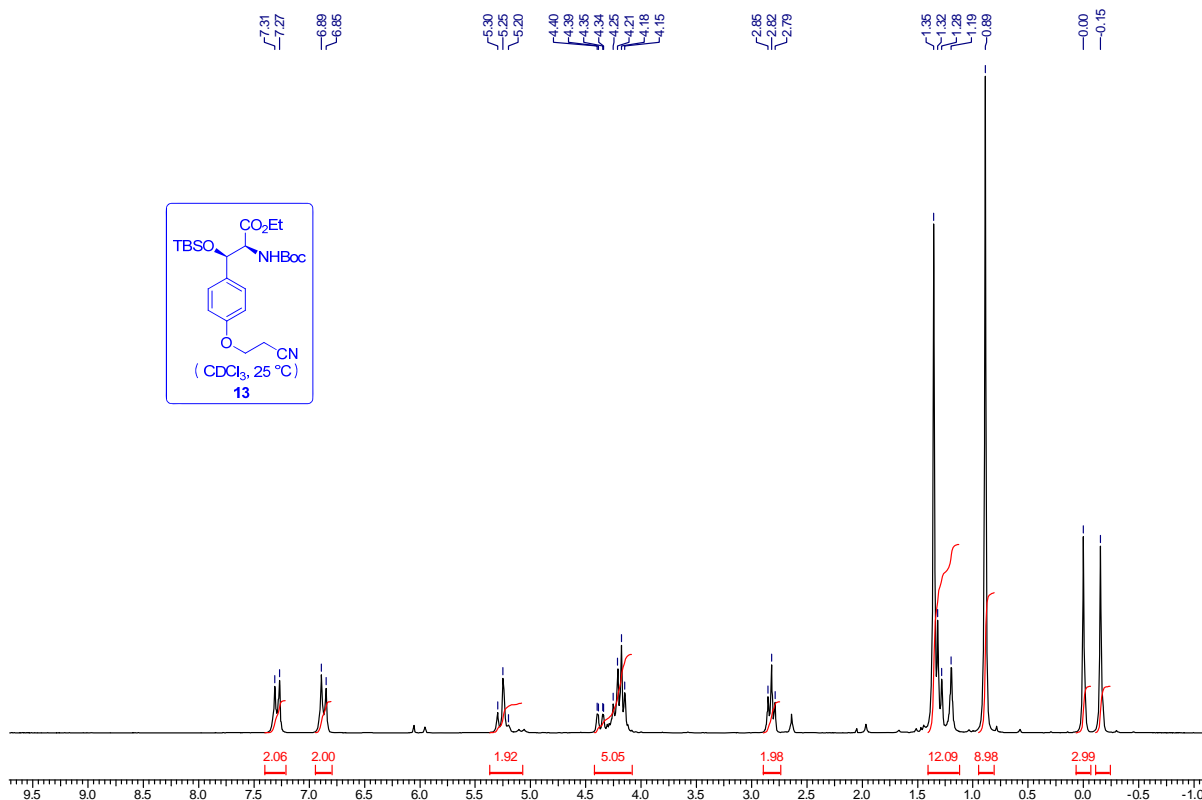

9 May 2011  
 Alok/10997

|                        |        |         |            |                       |                     |
|------------------------|--------|---------|------------|-----------------------|---------------------|
| Acquisition Time (sec) | 2.7329 | Comment | Alok/10997 | Date                  | 07/05/2011 03:00:28 |
| Frequency (MHz)        | 50.32  | Nucleus | 13C        | Original Points Count | 32768               |
| Temperature (grad C)   | 0.000  |         |            | Points Count          | 32768               |
|                        |        |         |            | Sweep Width (Hz)      | 11990.41            |

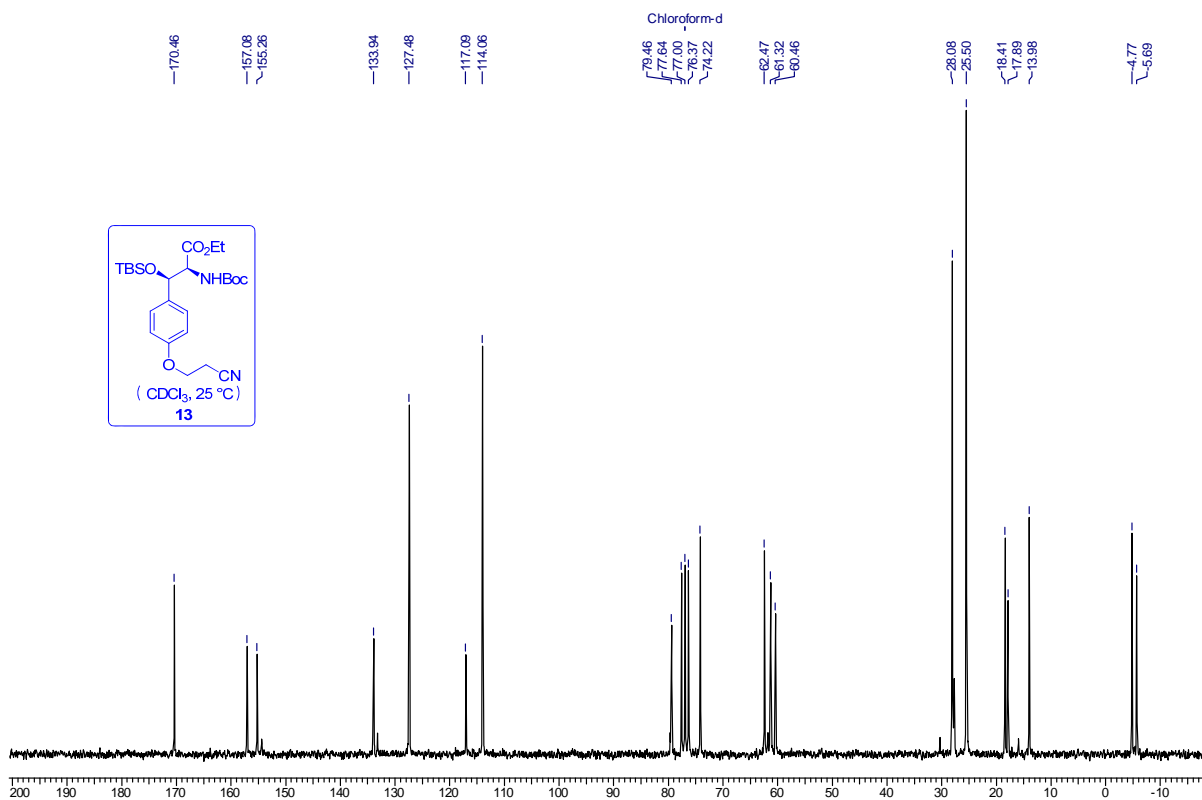

9 May 2011  
 Alok/10997

|                        |        |         |            |                       |                     |              |       |                  |          |
|------------------------|--------|---------|------------|-----------------------|---------------------|--------------|-------|------------------|----------|
| Acquisition Time (sec) | 2.7329 | Comment | Alok/10997 | Date                  | 07/05/2011 02:21:42 |              |       |                  |          |
| Frequency (MHz)        | 50.32  | Nucleus | 13C        | Original Points Count | 32768               | Points Count | 32768 | Sweep Width (Hz) | 11990.41 |
| Temperature (grad C)   | 0.000  |         |            |                       |                     |              |       |                  |          |

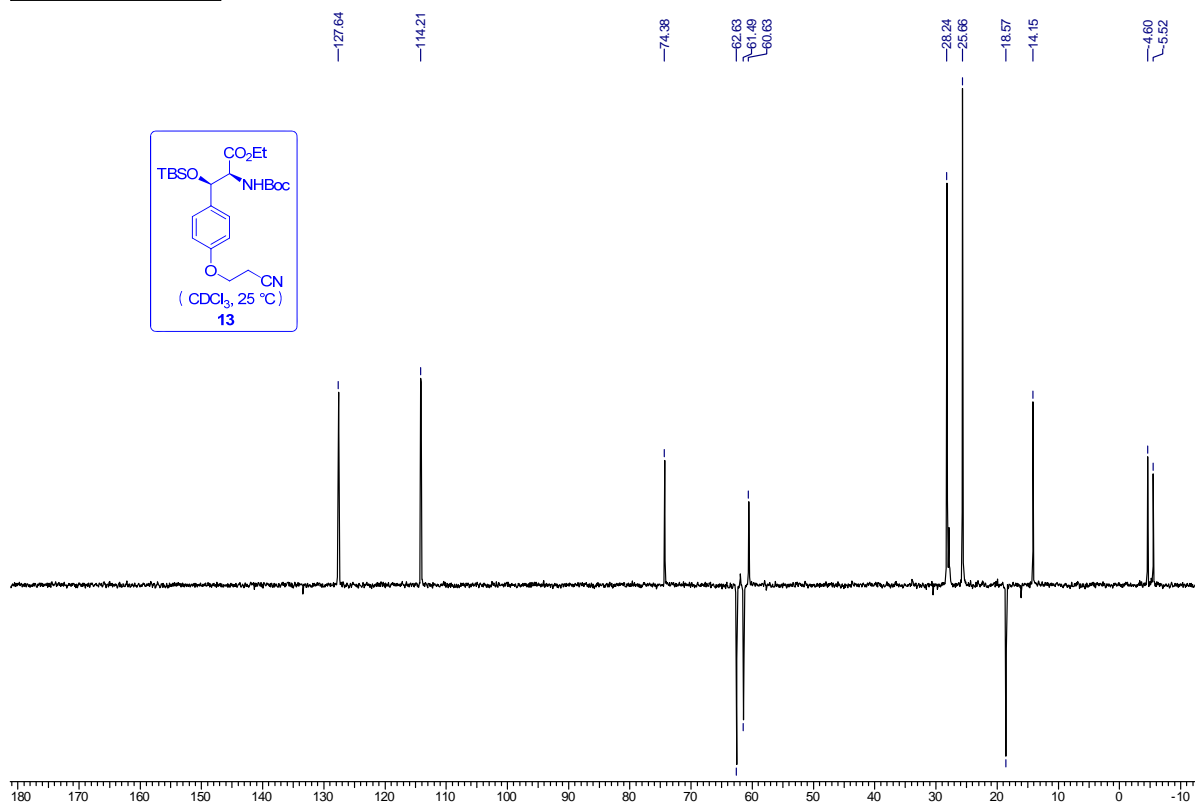

20 Jan 2011

|                        |        |         |            |                       |                     |              |       |                  |         |
|------------------------|--------|---------|------------|-----------------------|---------------------|--------------|-------|------------------|---------|
| Acquisition Time (sec) | 7.9167 | Comment | Alok/10997 | Date                  | 28/04/2010 15:37:50 |              |       |                  |         |
| Frequency (MHz)        | 200.13 | Nucleus | 1H         | Original Points Count | 32768               | Points Count | 32768 | Sweep Width (Hz) | 4139.07 |
| Temperature (grad C)   | 0.000  |         |            |                       |                     |              |       |                  |         |

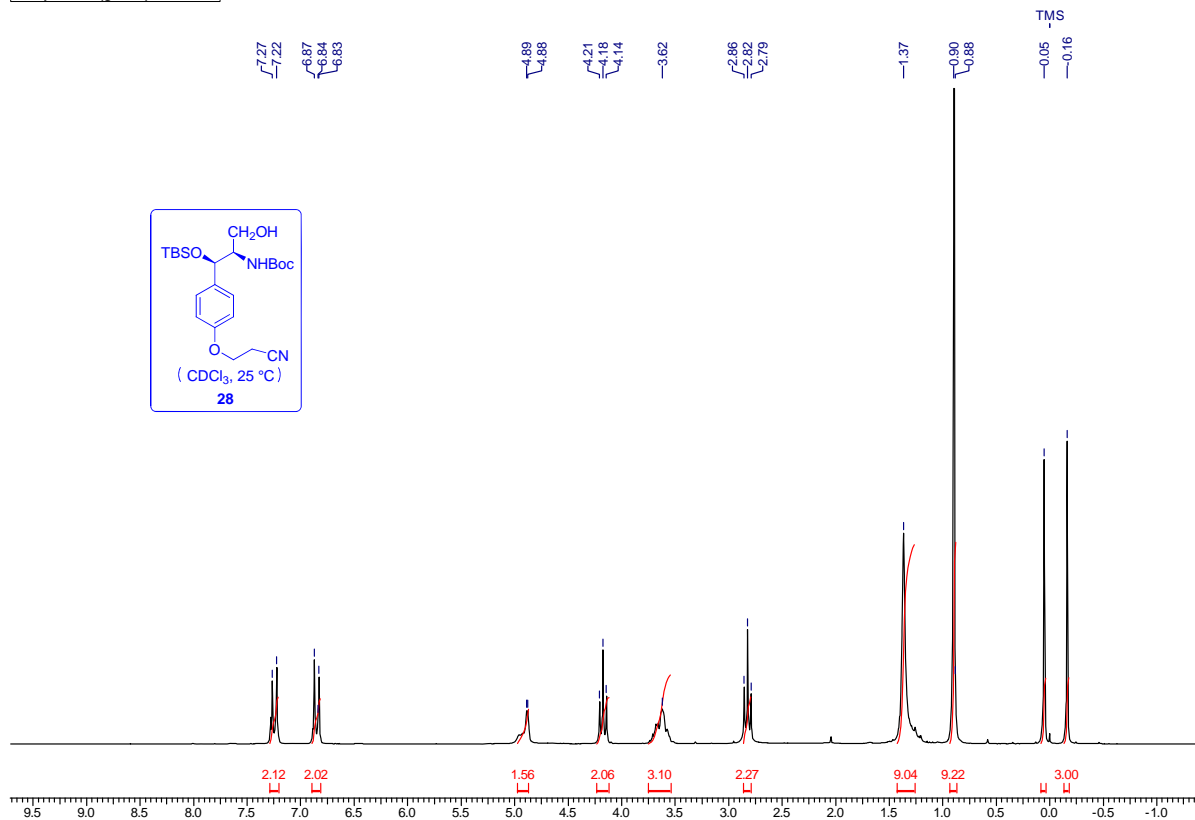

30 May 2011  
 Alok/10997

|                        |        |         |            |                       |                     |                  |          |
|------------------------|--------|---------|------------|-----------------------|---------------------|------------------|----------|
| Acquisition Time (sec) | 2.7329 | Comment | Alok/10997 | Date                  | 02/05/2010 13:24:16 |                  |          |
| Frequency (MHz)        | 50.32  | Nucleus | 13C        | Original Points Count | 32768               | Points Count     | 32768    |
| Temperature (grad C)   | 0.000  |         |            |                       |                     | Sweep Width (Hz) | 11990.41 |

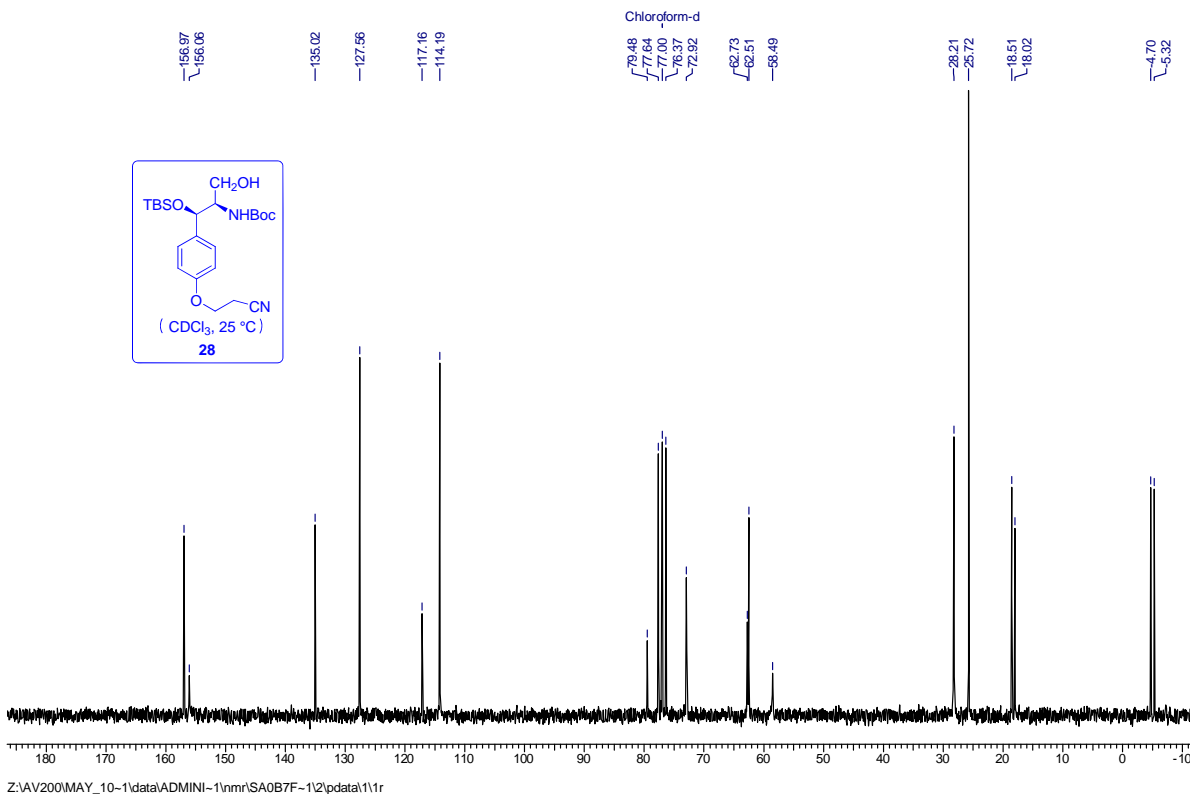

30 May 2011  
 Alok/10997

|                        |        |         |            |                       |                     |                  |          |
|------------------------|--------|---------|------------|-----------------------|---------------------|------------------|----------|
| Acquisition Time (sec) | 2.7329 | Comment | Alok/10997 | Date                  | 02/05/2010 13:04:54 |                  |          |
| Frequency (MHz)        | 50.32  | Nucleus | 13C        | Original Points Count | 32768               | Points Count     | 32768    |
| Temperature (grad C)   | 0.000  |         |            |                       |                     | Sweep Width (Hz) | 11990.41 |

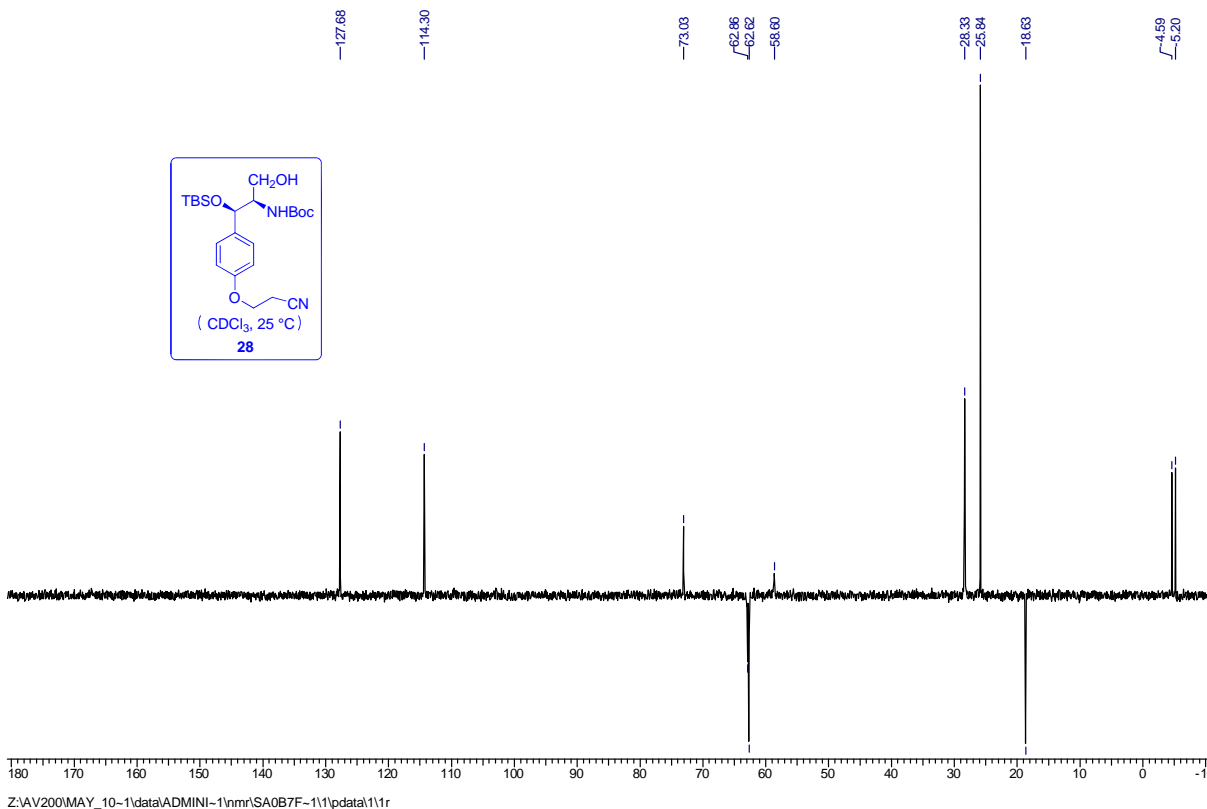

20 May 2011  
 1H

|                        |        |                       |       |              |                     |                  |          |
|------------------------|--------|-----------------------|-------|--------------|---------------------|------------------|----------|
| Acquisition Time (sec) | 3.2768 | Comment               | 1H    | Date         | 25/05/2010 22:14:54 | Frequency (MHz)  | 500.13   |
| Nucleus                | 1H     | Original Points Count | 32768 | Points Count | 32768               | Sweep Width (Hz) | 10000.00 |
| Temperature (grad C)   | 0.000  |                       |       |              |                     |                  |          |

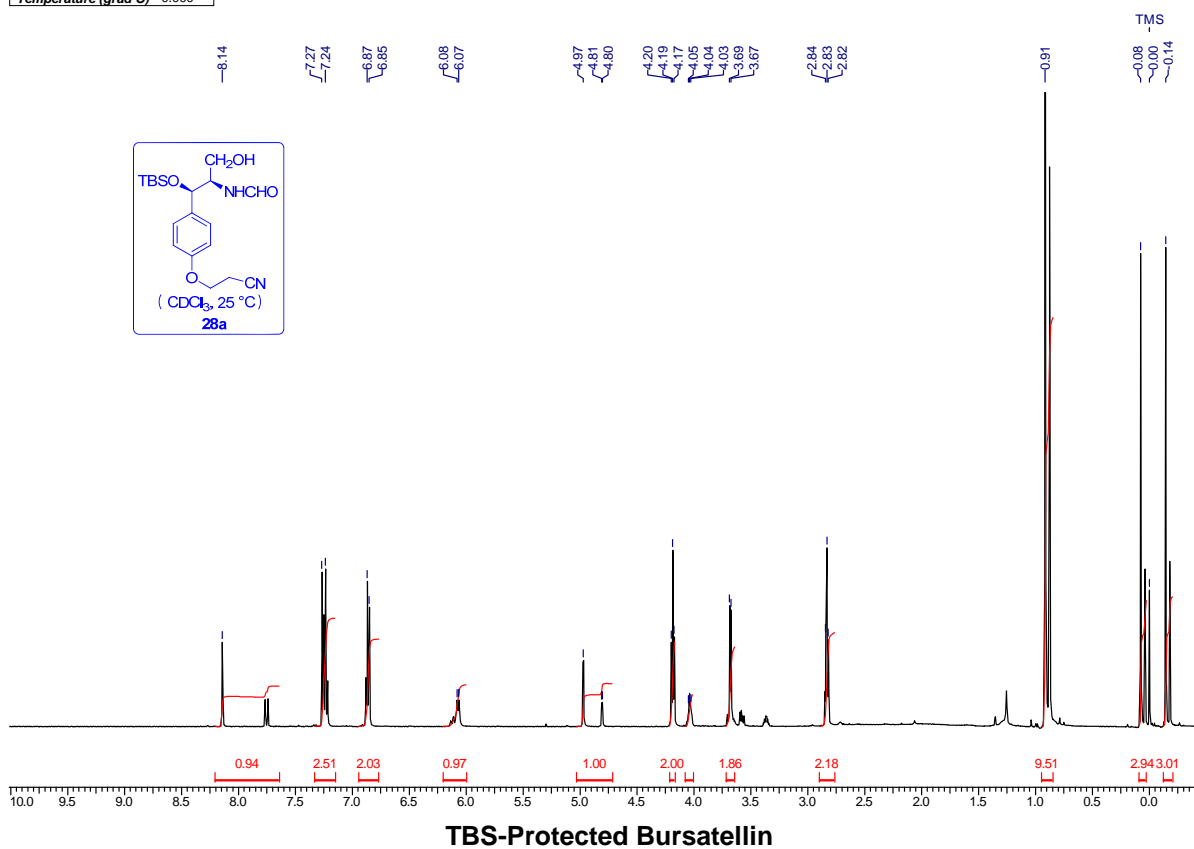

20 May 2011  
 13C

|                        |        |                       |       |              |                     |                  |          |
|------------------------|--------|-----------------------|-------|--------------|---------------------|------------------|----------|
| Acquisition Time (sec) | 1.1010 | Comment               | 13C   | Date         | 26/05/2010 13:13:32 | Frequency (MHz)  | 125.76   |
| Nucleus                | 13C    | Original Points Count | 32768 | Points Count | 32768               | Sweep Width (Hz) | 29761.90 |
| Temperature (grad C)   | 0.000  |                       |       |              |                     |                  |          |

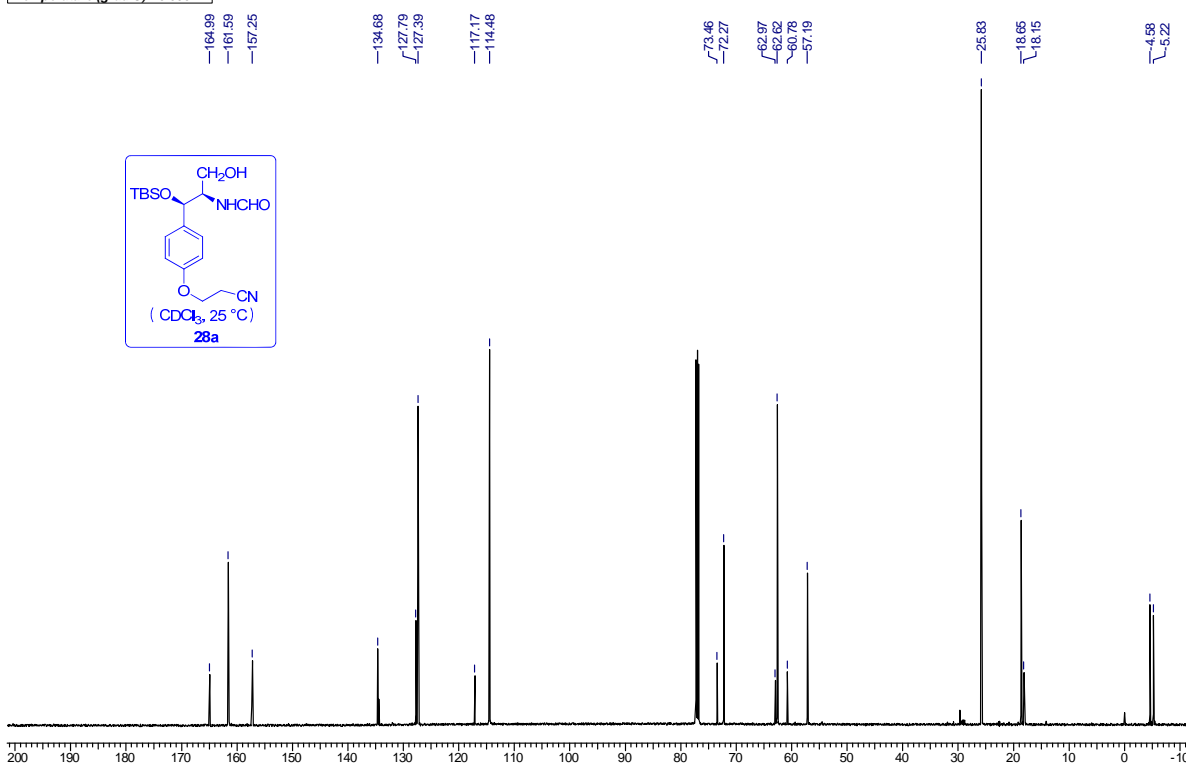

### TBS-Protected Bursatellin

20 May 2011  
 Alok/10997

|                        |        |         |                 |                       |                     |              |       |                  |          |
|------------------------|--------|---------|-----------------|-----------------------|---------------------|--------------|-------|------------------|----------|
| Acquisition Time (sec) | 2.7329 | Comment | Alok/10997      | Date                  | 06/11/2010 16:10:58 |              |       |                  |          |
| Frequency (MHz)        | 50.32  | Nucleus | <sup>13</sup> C | Original Points Count | 32768               | Points Count | 32768 | Sweep Width (Hz) | 11990.41 |
| Temperature (grad C)   | 0.000  |         |                 |                       |                     |              |       |                  |          |

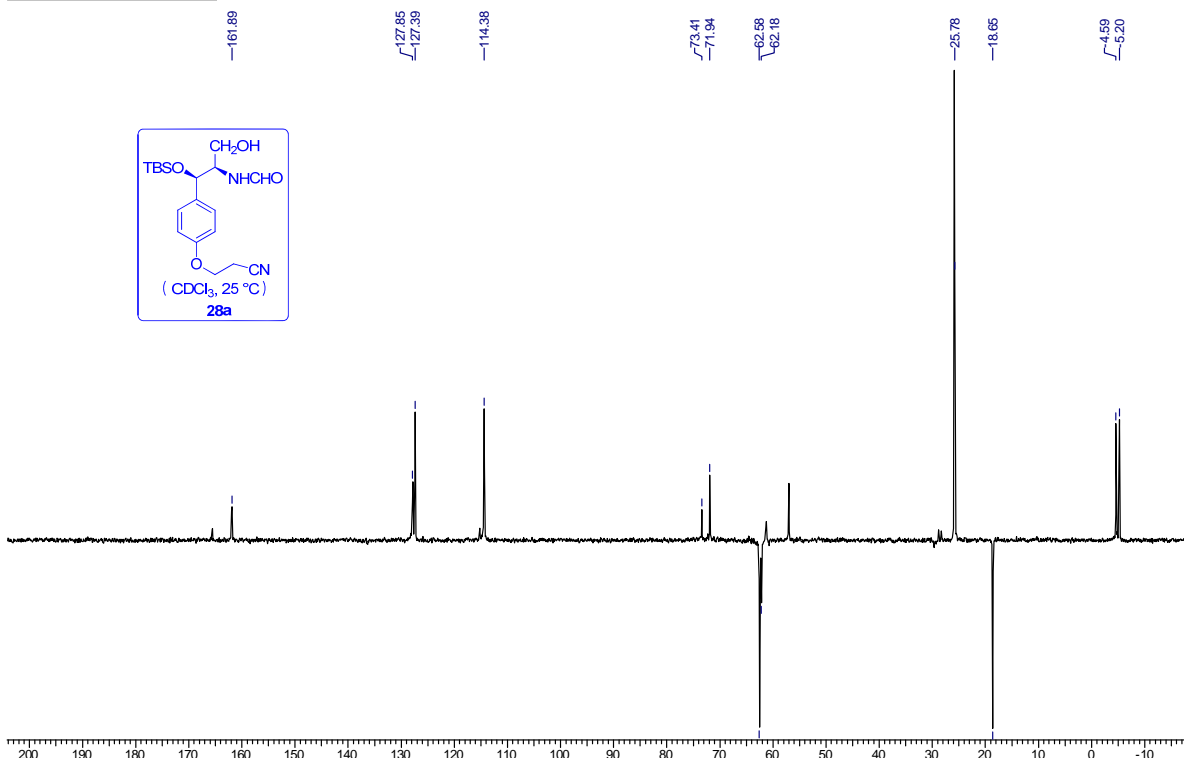

### (-)-Bursatellin

19 May 2011  
 Thu2av400#009  
 Alok

|                        |                |                       |       |              |                     |                  |                 |        |
|------------------------|----------------|-----------------------|-------|--------------|---------------------|------------------|-----------------|--------|
| Acquisition Time (sec) | 3.9846         | Comment               | Alok  | Date         | 07/02/2011 09:30:44 |                  | Frequency (MHz) | 400.13 |
| Nucleus                | <sup>1</sup> H | Original Points Count | 32768 | Points Count | 32768               | Sweep Width (Hz) | 8223.68         |        |
| Temperature (grad C)   | 0.000          |                       |       |              |                     |                  |                 |        |

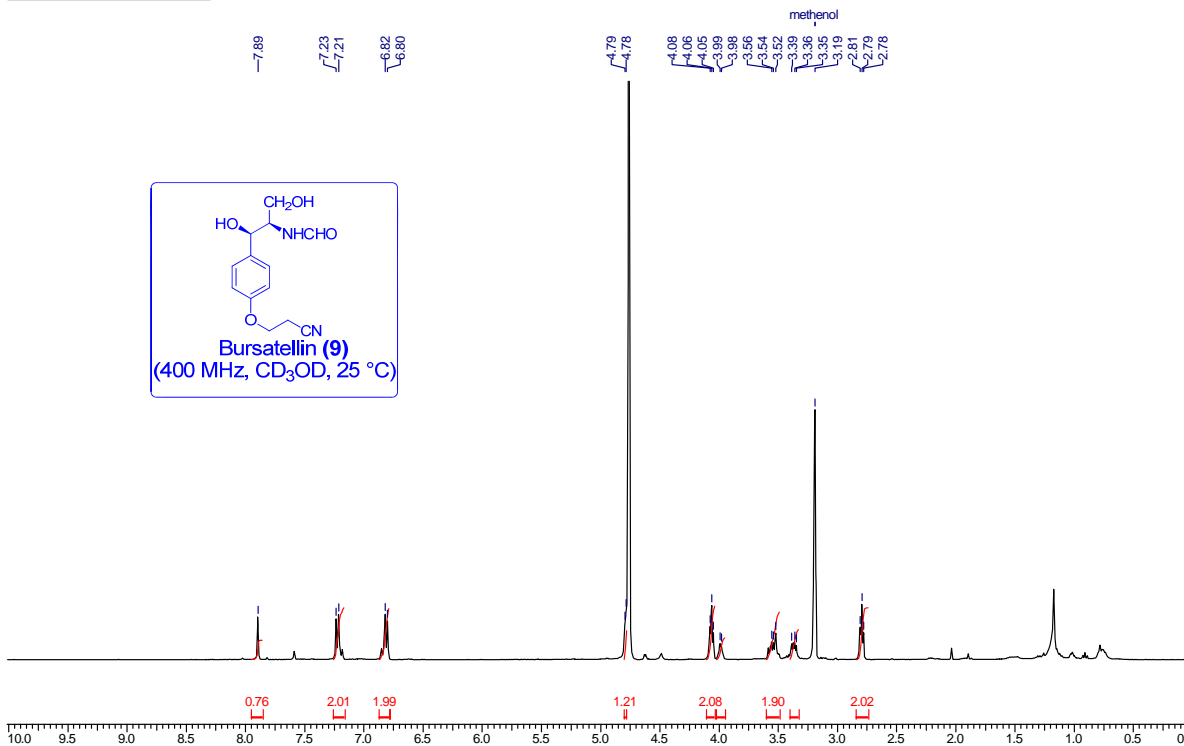

**(-)-Bursatellin**

19 May 2011  
 Thu2av400#009  
 Alok

|                        |        |                       |       |              |                     |                  |          |
|------------------------|--------|-----------------------|-------|--------------|---------------------|------------------|----------|
| Acquisition Time (sec) | 1.2976 | Comment               | Alok  | Date         | 07/02/2011 09:31:46 | Frequency (MHz)  | 100.61   |
| Nucleus                | 13C    | Original Points Count | 32768 | Points Count | 32768               | Sweep Width (Hz) | 25252.53 |
| Temperature (grad C)   | 0.000  |                       |       |              |                     |                  |          |

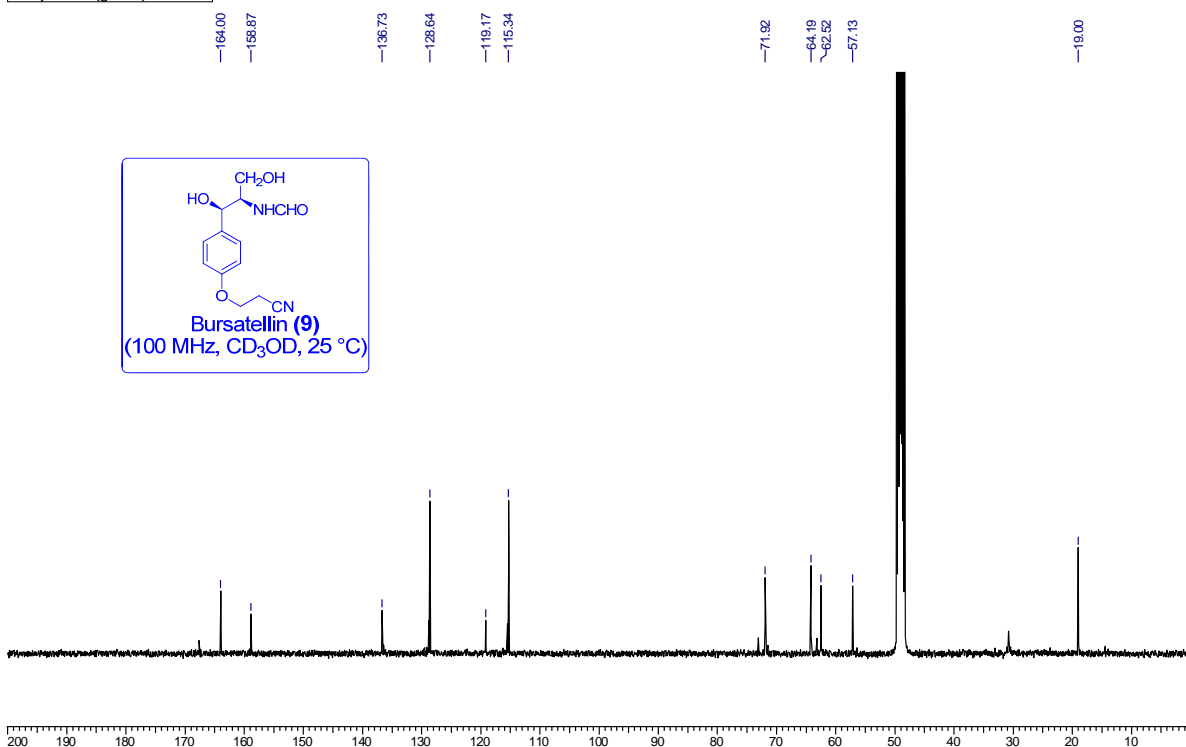

**(-)-Bursatellin**

19 May 2011  
 Thu2av400#009  
 Alok

|                        |        |                       |       |              |                     |                  |          |
|------------------------|--------|-----------------------|-------|--------------|---------------------|------------------|----------|
| Acquisition Time (sec) | 1.2976 | Comment               | Alok  | Date         | 07/02/2011 09:30:54 | Frequency (MHz)  | 100.61   |
| Nucleus                | 13C    | Original Points Count | 32768 | Points Count | 32768               | Sweep Width (Hz) | 25252.53 |
| Temperature (grad C)   | 0.000  |                       |       |              |                     |                  |          |

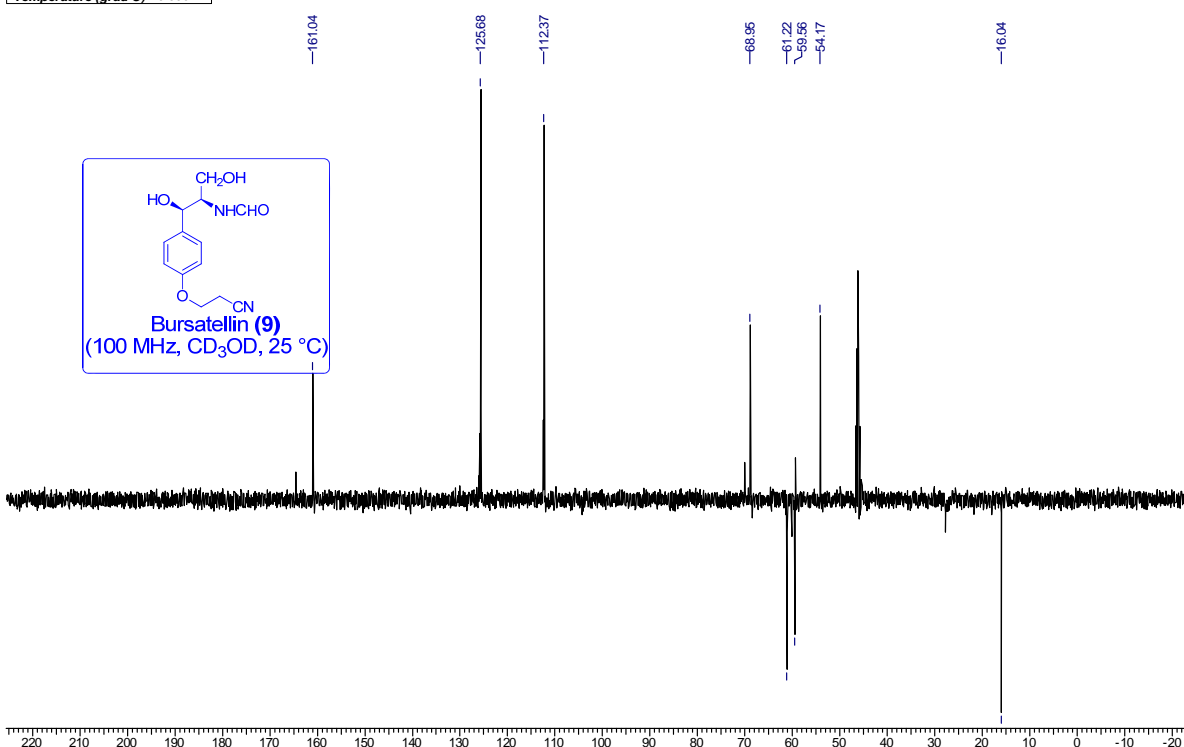



3 Jan 2011

|                        |        |         |                |                       |                     |              |       |                  |         |
|------------------------|--------|---------|----------------|-----------------------|---------------------|--------------|-------|------------------|---------|
| Acquisition Time (sec) | 3.9846 | Comment | Alck10997      | Date                  | 03/01/2011 16:27:34 |              |       |                  |         |
| Frequency (MHz)        | 400.13 | Nucleus | <sup>1</sup> H | Original Points Count | 32768               | Points Count | 32768 | Sweep Width (Hz) | 8223.68 |
| Temperature (grad C)   | 0.000  |         |                |                       |                     |              |       |                  |         |

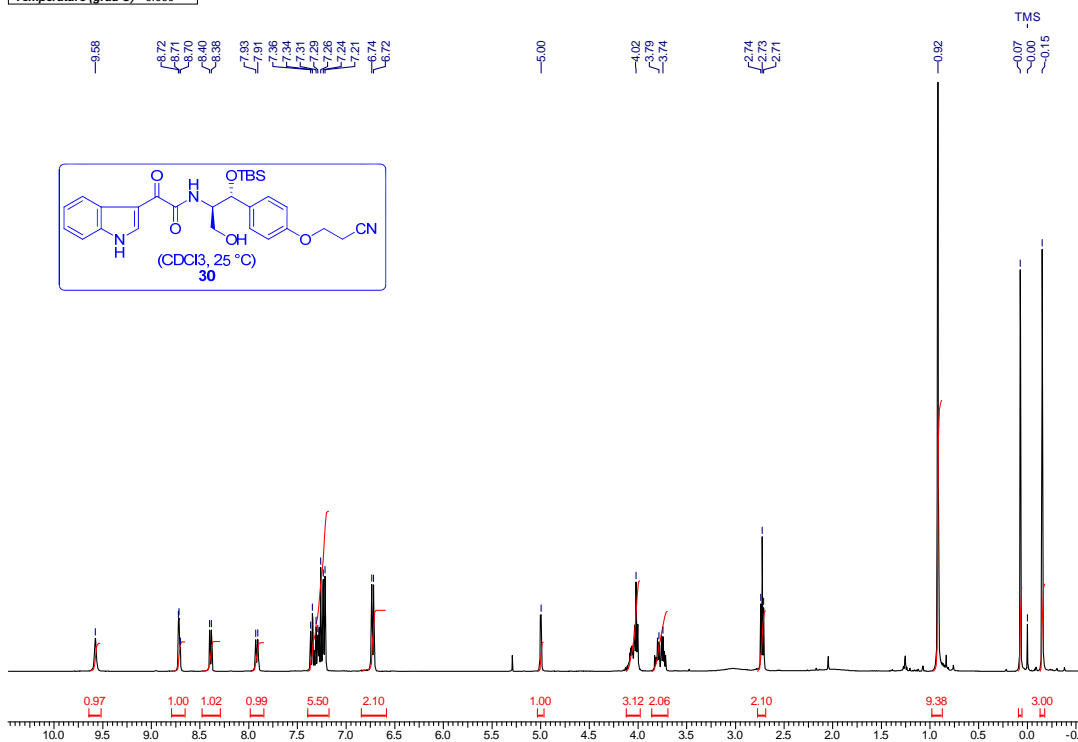

3 Jan 2011

|                        |        |                       |       |              |                     |                  |                 |        |
|------------------------|--------|-----------------------|-------|--------------|---------------------|------------------|-----------------|--------|
| Acquisition Time (sec) | 1.3631 | Comment               | 13C   | Date         | 03/01/2011 16:27:50 |                  | Frequency (MHz) | 100.61 |
| Nucleus                | 13C    | Original Points Count | 32768 | Points Count | 32768               | Sweep Width (Hz) | 24038.46        |        |
| Temperature (grad C)   | 0.000  |                       |       |              |                     |                  |                 |        |

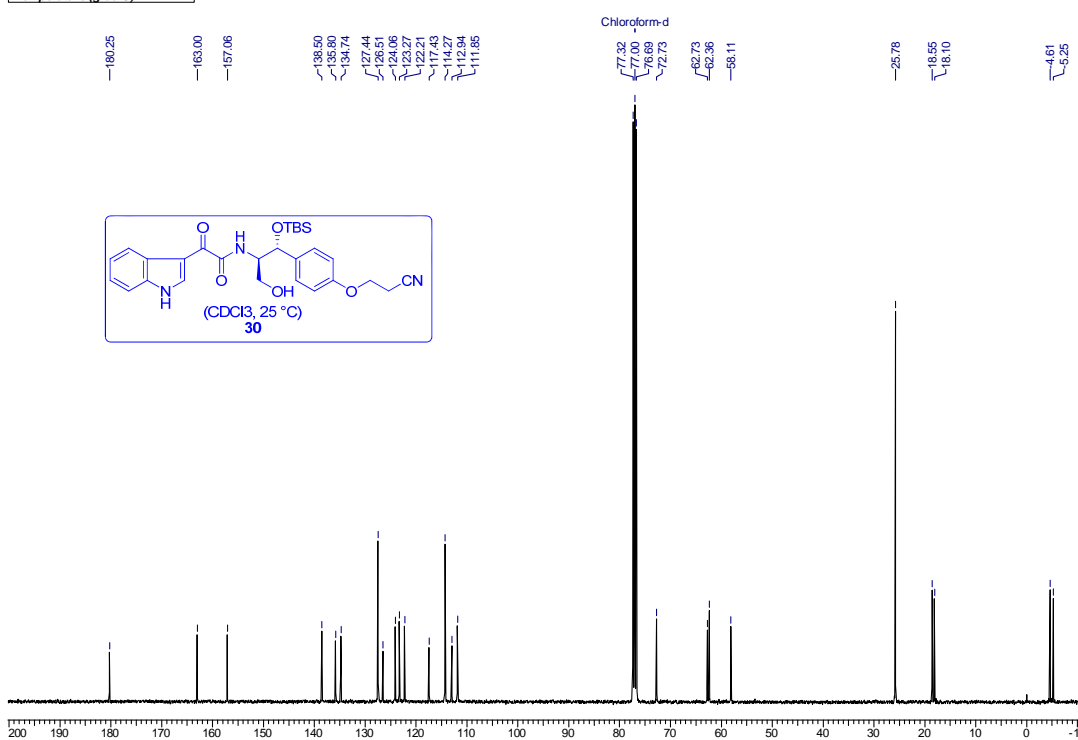

3 Jan 2011

| Acquisition Time (sec) | 1.3631          | Comment               | DEPT  | Date         | 03/01/2011 16:27:42 | Frequency (MHz)  | 100.61   |
|------------------------|-----------------|-----------------------|-------|--------------|---------------------|------------------|----------|
| Nucleus                | <sup>13</sup> C | Original Points Count | 32768 | Points Count | 32768               | Sweep Width (Hz) | 24038.46 |
| Temperature (grad C)   | 0.000           |                       |       |              |                     |                  |          |

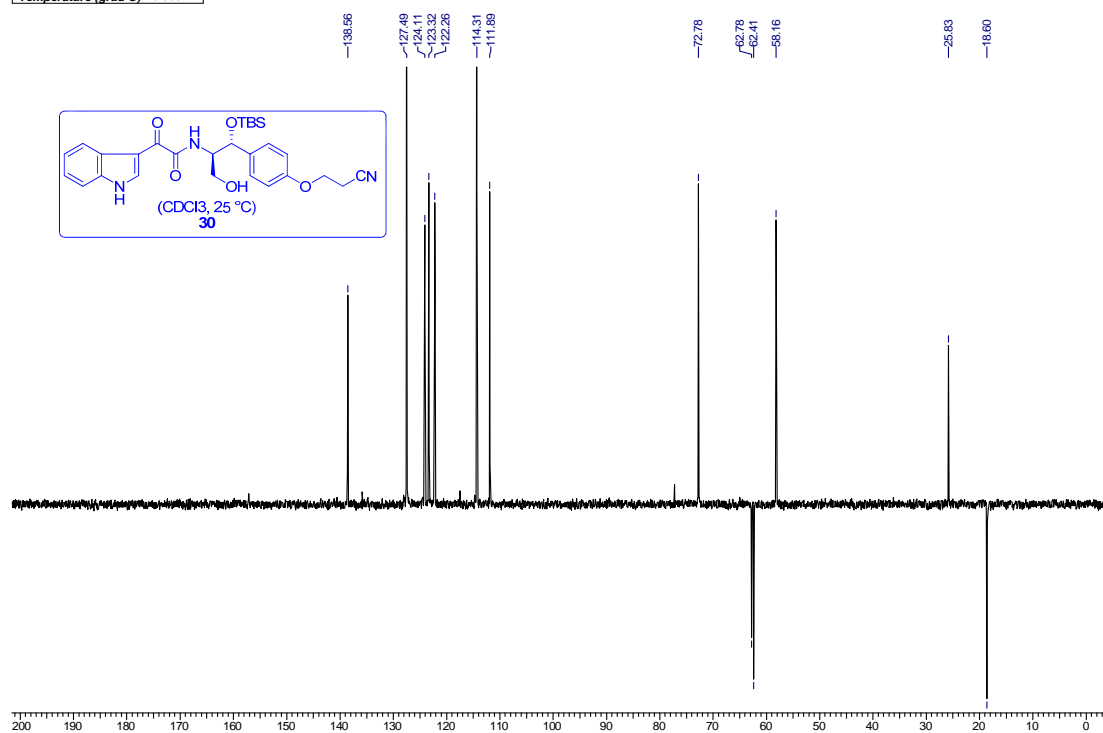

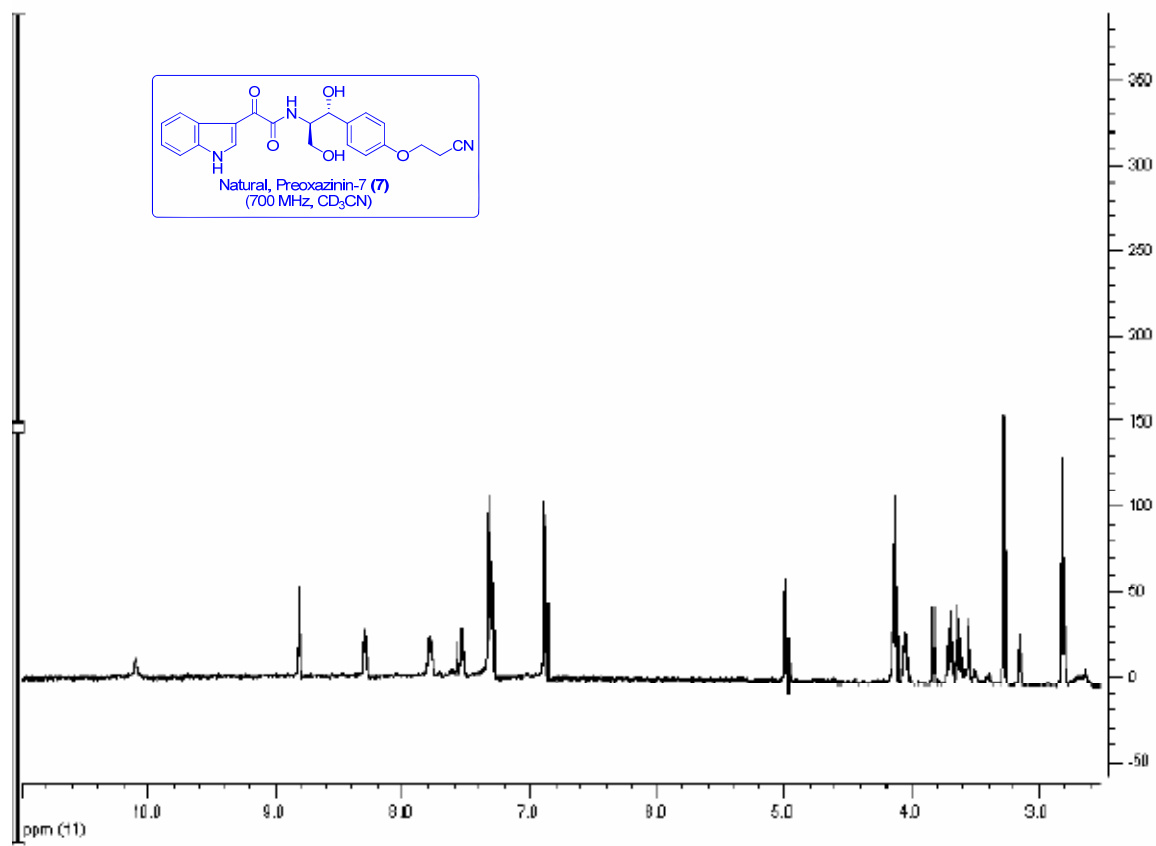

Preoxazin

18 May 2011  
 Thu2av400#009  
 Alok R/10997

|                        |        |         |              |                       |                  |                     |       |
|------------------------|--------|---------|--------------|-----------------------|------------------|---------------------|-------|
| Acquisition Time (sec) | 3.9846 | Comment | Alok R/10997 |                       | Date             | 17/05/2010 21:04:00 |       |
| Frequency (MHz)        | 400.13 | Nucleus | 1H           | Original Points Count | 32768            | Points Count        | 32768 |
| Temperature (grad C)   | 0.000  |         |              |                       | Sweep Width (Hz) | 8223.68             |       |

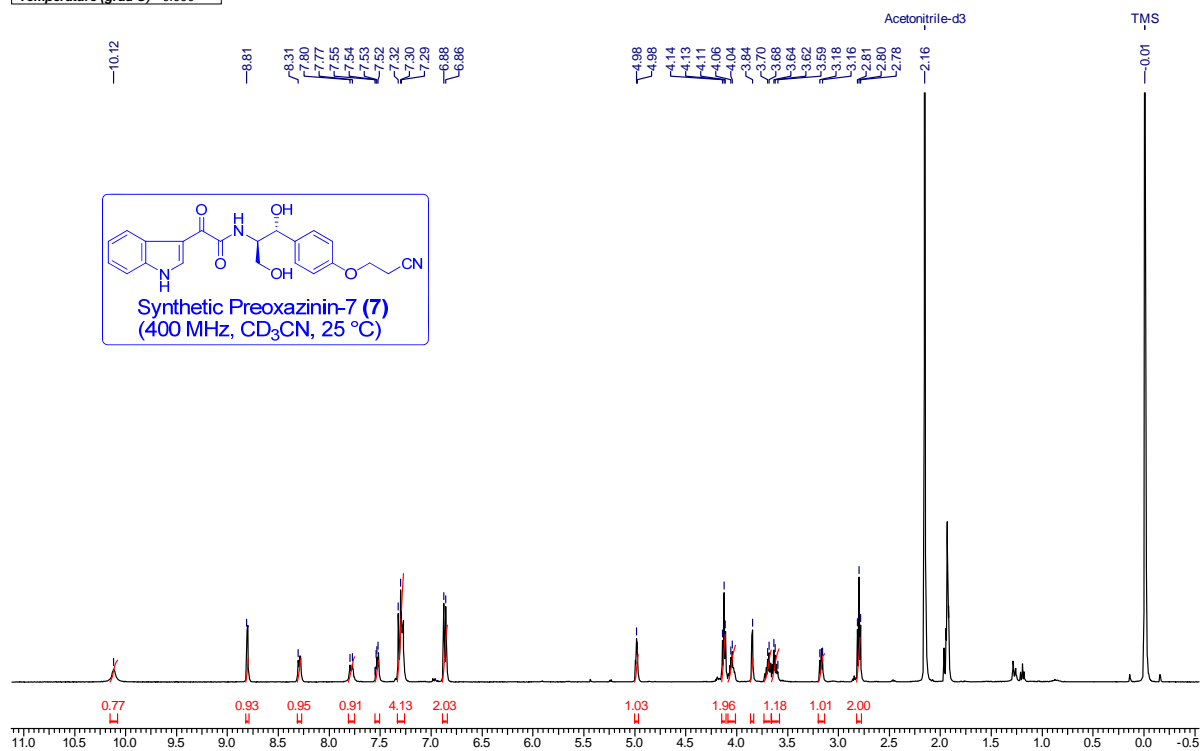

23 Dec 2010

|                        |        |         |                 |                       |                     |
|------------------------|--------|---------|-----------------|-----------------------|---------------------|
| Acquisition Time (sec) | 1.3631 | Comment | Alok R/10997    | Date                  | 18/05/2010 10:30:42 |
| Frequency (MHz)        | 100.61 | Nucleus | <sup>13</sup> C | Original Points Count | 32768               |
| Temperature (grad C)   | 0.000  |         |                 | Points Count          | 32768               |
|                        |        |         |                 | Sweep Width (Hz)      | 24038.46            |

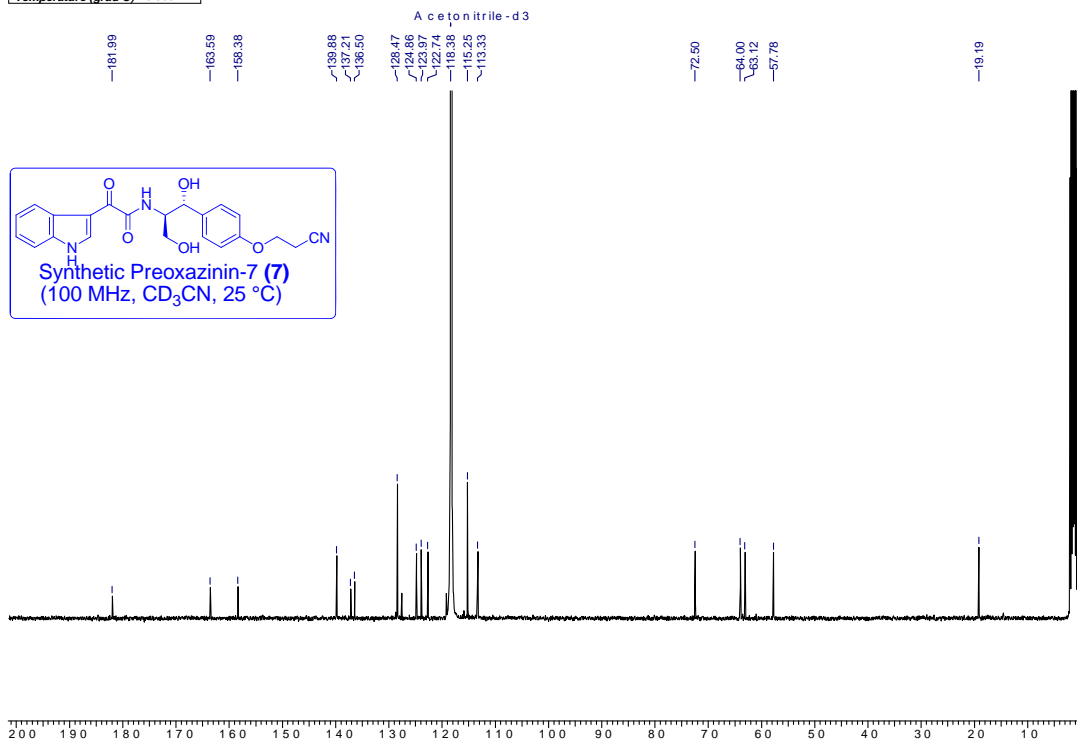

23 Dec 2010

|                        |        |         |                 |                       |                     |
|------------------------|--------|---------|-----------------|-----------------------|---------------------|
| Acquisition Time (sec) | 1.3631 | Comment | Alok R/10997    | Date                  | 18/05/2010 18:39:38 |
| Frequency (MHz)        | 100.61 | Nucleus | <sup>13</sup> C | Original Points Count | 32768               |
| Temperature (grad C)   | 0.000  |         |                 | Points Count          | 32768               |
|                        |        |         |                 | Sweep Width (Hz)      | 24038.46            |

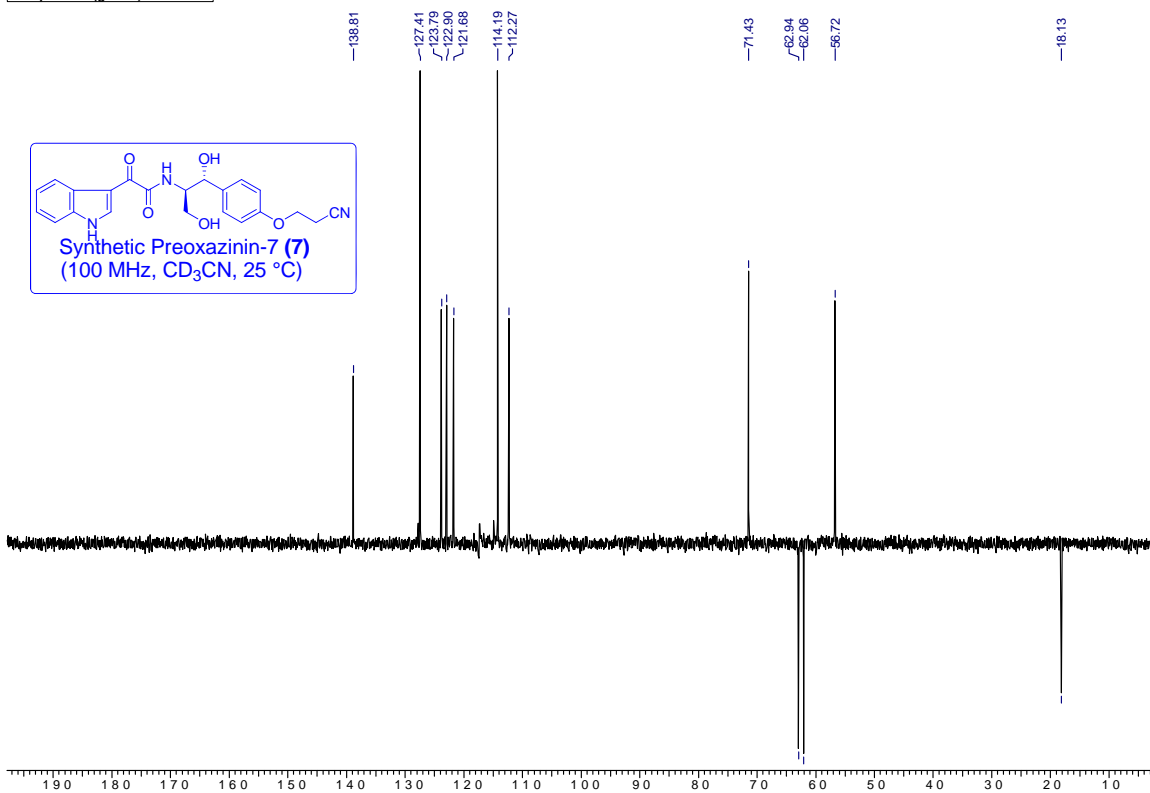

### TBS-protected oxazinin-5

28 Apr 2011  
 mon5av400#002  
 VHP

|                        |                |                       |       |              |                     |                  |         |
|------------------------|----------------|-----------------------|-------|--------------|---------------------|------------------|---------|
| Acquisition Time (sec) | 3.9846         | Comment               | Alok  | Date         | 28/03/2011 15:45:38 | Frequency (MHz)  | 400.13  |
| Nucleus                | <sup>1</sup> H | Original Points Count | 32768 | Points Count | 32768               | Sweep Width (Hz) | 8223.68 |
| Temperature (grad C)   | 0.000          |                       |       |              |                     |                  |         |

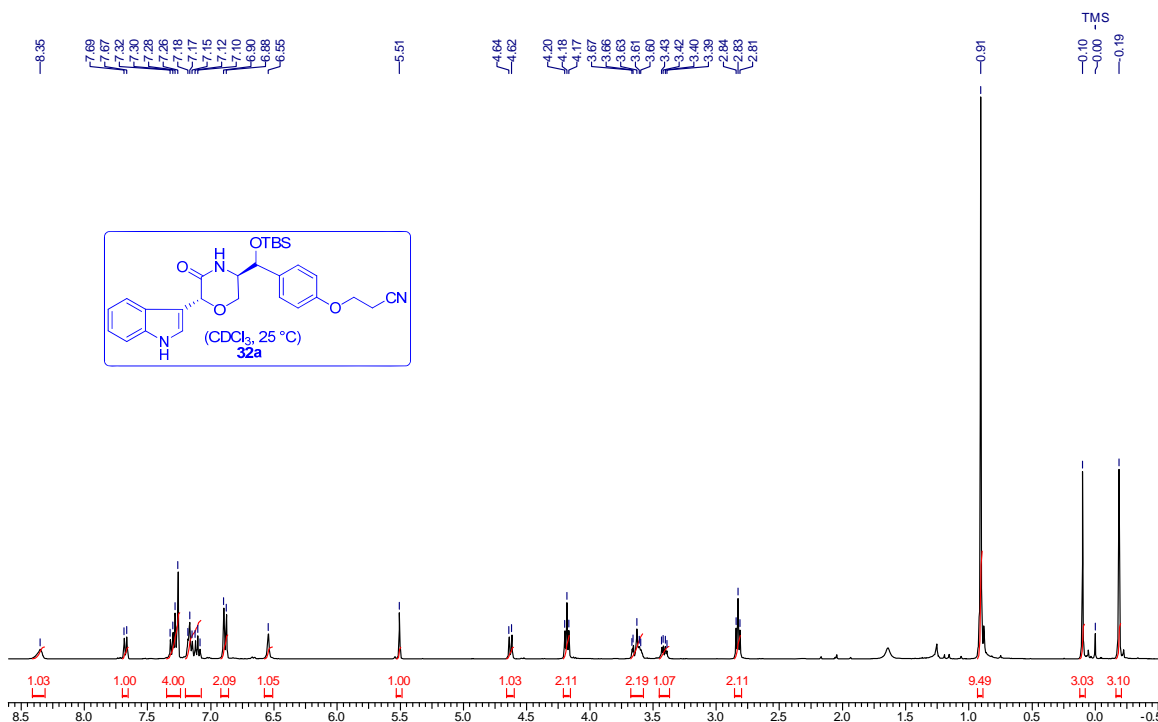

### TBS-protected oxazinin-5

28 Apr 2011  
 mon5av400#002  
 13C

|                        |                 |                       |       |              |                     |                  |          |
|------------------------|-----------------|-----------------------|-------|--------------|---------------------|------------------|----------|
| Acquisition Time (sec) | 1.8350          | Comment               | 13C   | Date         | 28/03/2011 15:44:12 | Frequency (MHz)  | 100.61   |
| Nucleus                | <sup>13</sup> C | Original Points Count | 32768 | Points Count | 32768               | Sweep Width (Hz) | 17857.14 |
| Temperature (grad C)   | 0.000           |                       |       |              |                     |                  |          |

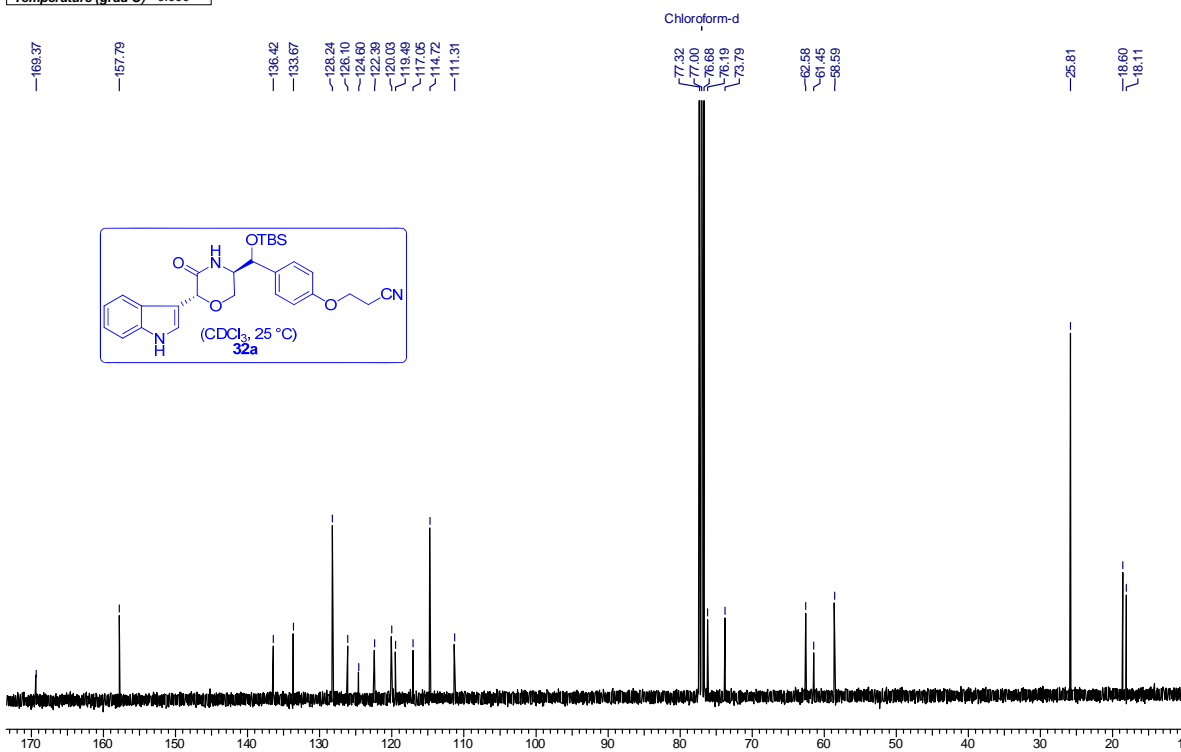

### TBS-protected oxazinin-5

28 Apr 2011  
 mon5av400#002  
 DEPT

|                        |                 |                       |       |              |                     |                  |          |
|------------------------|-----------------|-----------------------|-------|--------------|---------------------|------------------|----------|
| Acquisition Time (sec) | 1.2976          | Comment               | DEPT  | Date         | 28/03/2011 15:45:30 | Frequency (MHz)  | 100.61   |
| Nucleus                | <sup>13</sup> C | Original Points Count | 32768 | Points Count | 32768               | Sweep Width (Hz) | 25252.53 |
| Temperature (grad C)   | 0.000           |                       |       |              |                     |                  |          |

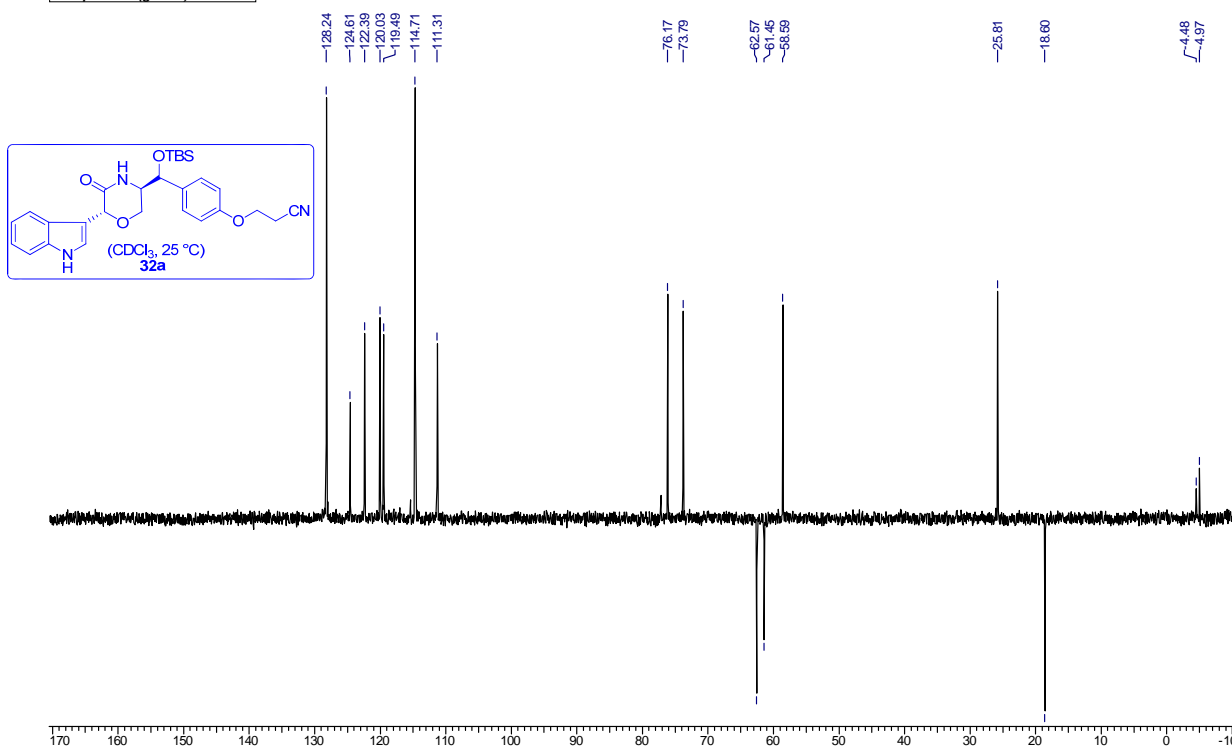

### TBS-protected oxazinin-6

28 Apr 2011  
 wed5av500#009  
 alok

|                        |                |                       |       |              |                     |                  |          |
|------------------------|----------------|-----------------------|-------|--------------|---------------------|------------------|----------|
| Acquisition Time (sec) | 3.2768         | Comment               | alok  | Date         | 23/03/2011 17:33:42 | Frequency (MHz)  | 500.13   |
| Nucleus                | <sup>1</sup> H | Original Points Count | 32768 | Points Count | 32768               | Sweep Width (Hz) | 10000.00 |
| Temperature (grad C)   | 0.000          |                       |       |              |                     |                  |          |

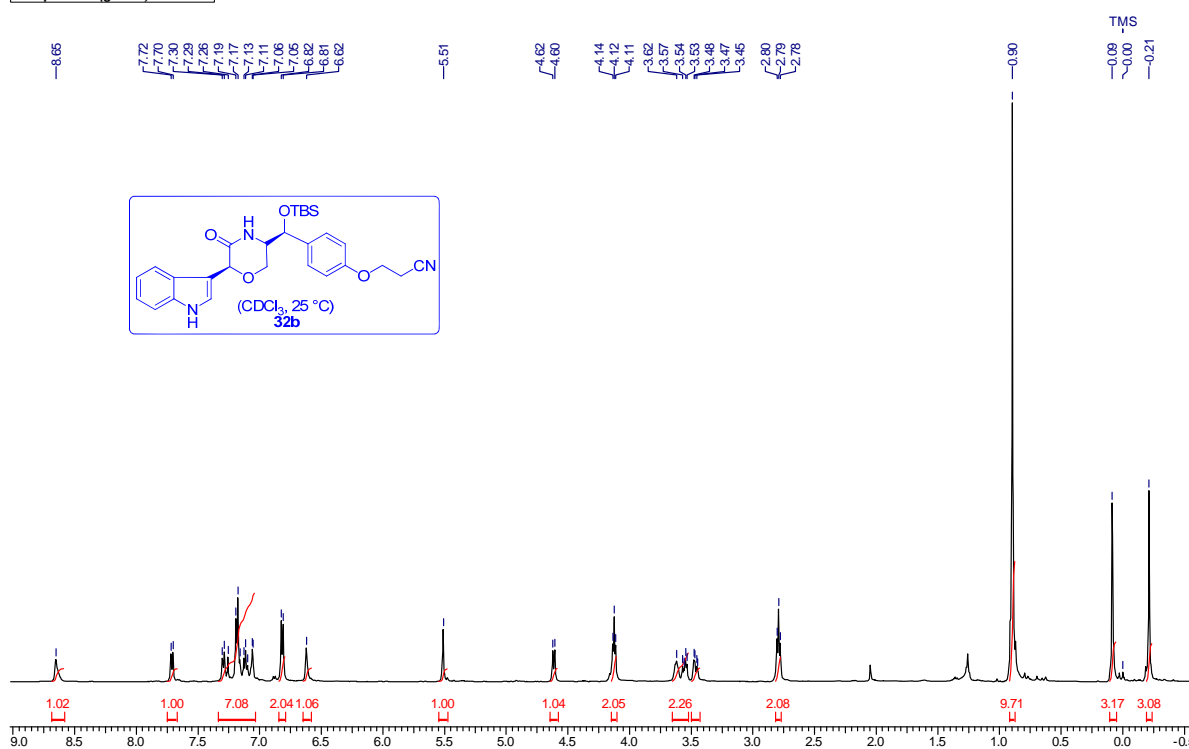

### TBS-protected oxazinin-6

28 Apr 2011  
 wed5av500#009  
 13C

|                        |        |                       |       |              |                     |                  |          |
|------------------------|--------|-----------------------|-------|--------------|---------------------|------------------|----------|
| Acquisition Time (sec) | 1.1010 | Comment               | 13C   | Date         | 23/03/2011 18:14:02 | Frequency (MHz)  | 125.76   |
| Nucleus                | 13C    | Original Points Count | 32768 | Points Count | 32768               | Sweep Width (Hz) | 29761.90 |
| Temperature (grad C)   | 0.000  |                       |       |              |                     |                  |          |

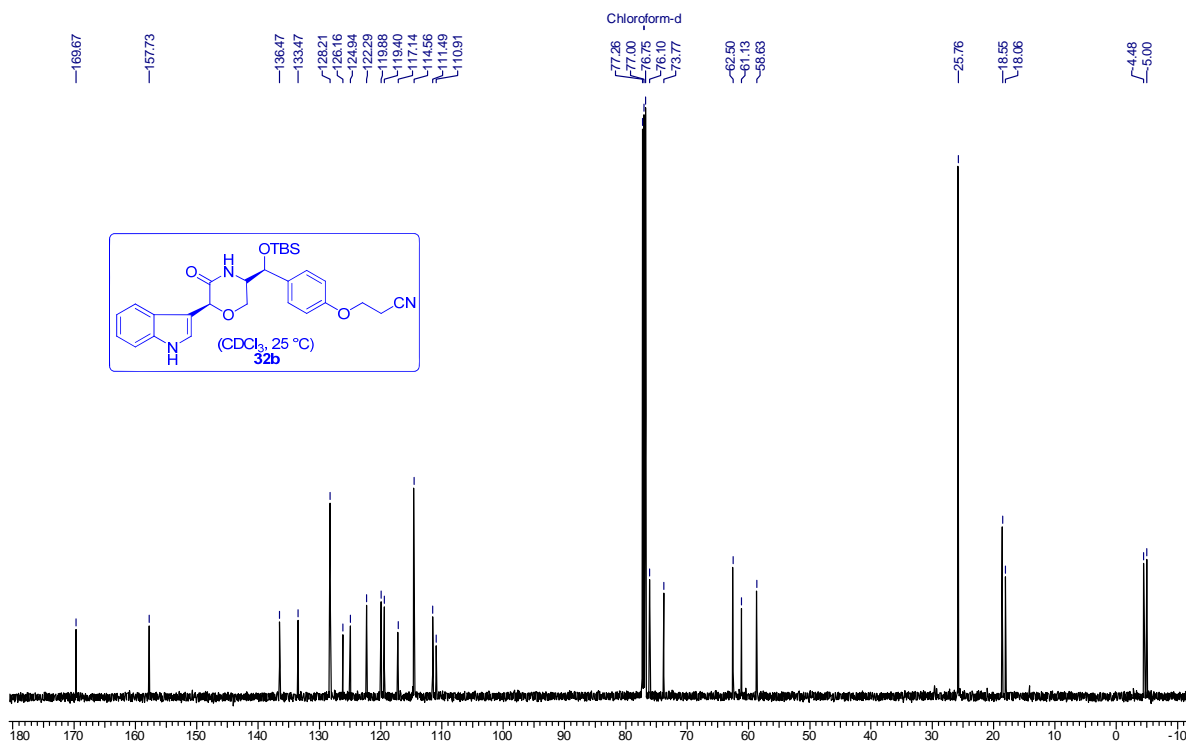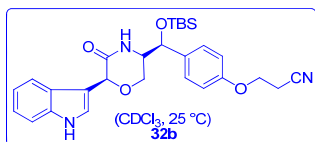

### TBS-protected oxazinin-6

28 Apr 2011  
 wed5av500#009  
 DEPT135

|                        |        |                       |         |              |                     |                  |          |
|------------------------|--------|-----------------------|---------|--------------|---------------------|------------------|----------|
| Acquisition Time (sec) | 1.1010 | Comment               | DEPT135 | Date         | 23/03/2011 17:55:36 | Frequency (MHz)  | 125.76   |
| Nucleus                | 13C    | Original Points Count | 32768   | Points Count | 32768               | Sweep Width (Hz) | 29761.90 |
| Temperature (grad C)   | 0.000  |                       |         |              |                     |                  |          |

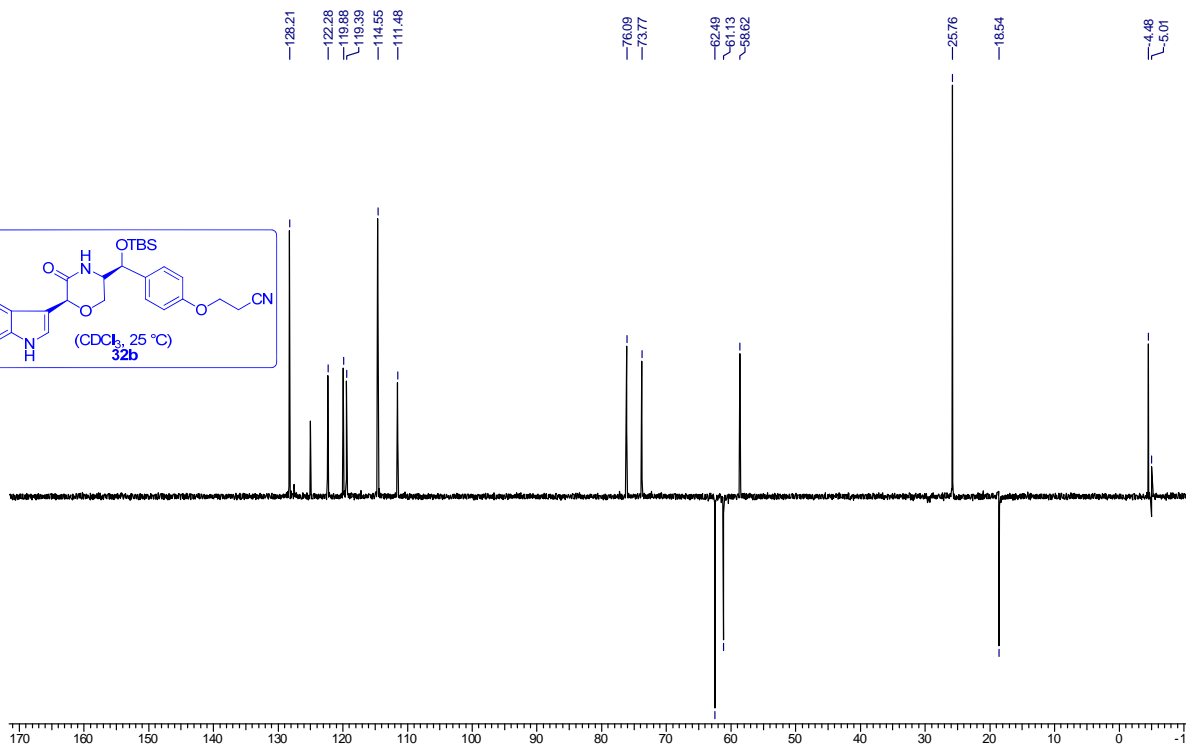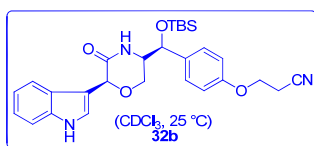

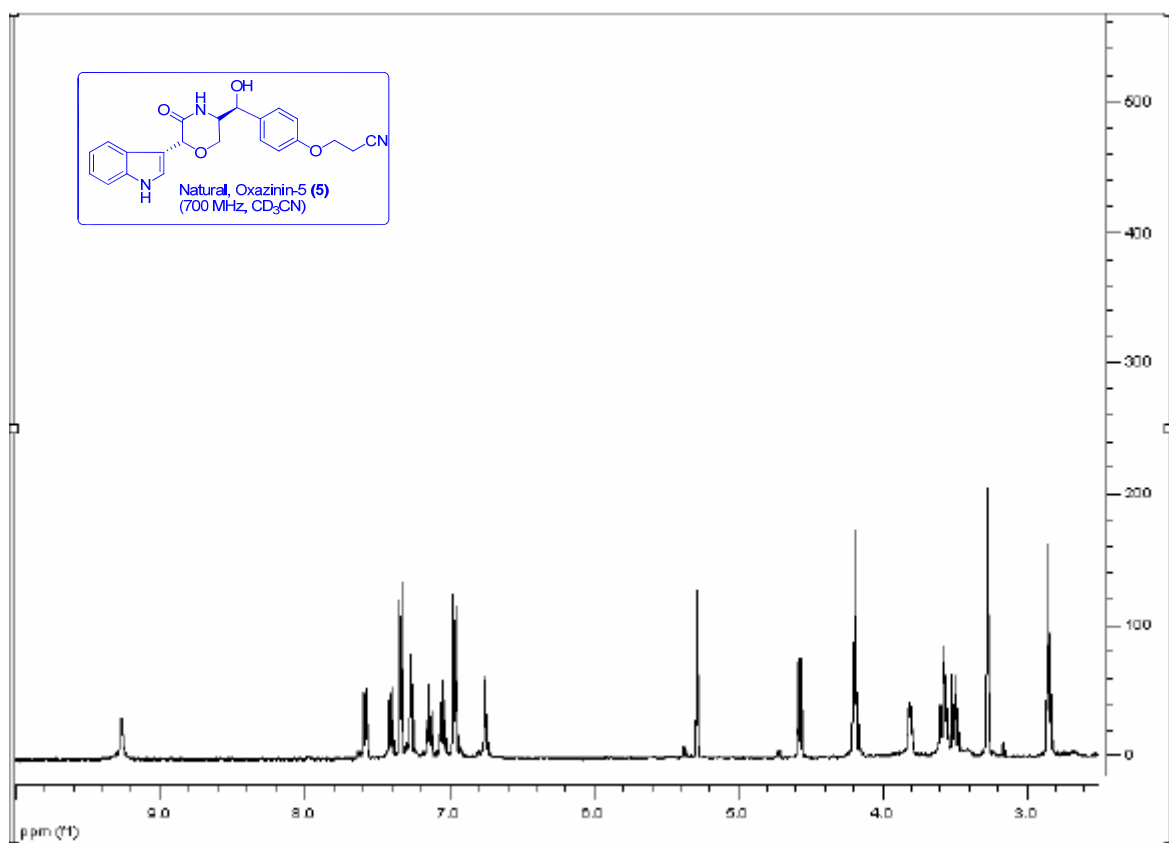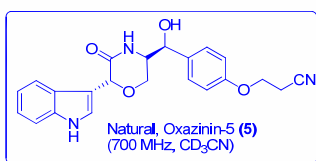

oxazinin-5

28 Apr 2011  
 wed3av400#012  
 VHP

|                        |        |              |             |                       |                     |
|------------------------|--------|--------------|-------------|-----------------------|---------------------|
| Acquisition Time (sec) | 4.0894 | Comment      | Alok Ranjan | Date                  | 13/04/2011 22:44:38 |
| Frequency (MHz)        | 400.13 | Nucleus      | 1H          | Original Points Count | 32768               |
| Temperature (grad C)   | 0.000  | Points Count | 32768       | Sweep Width (Hz)      | 8012.82             |

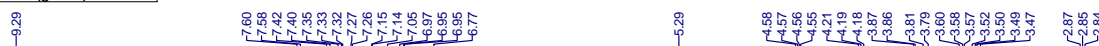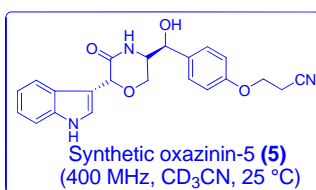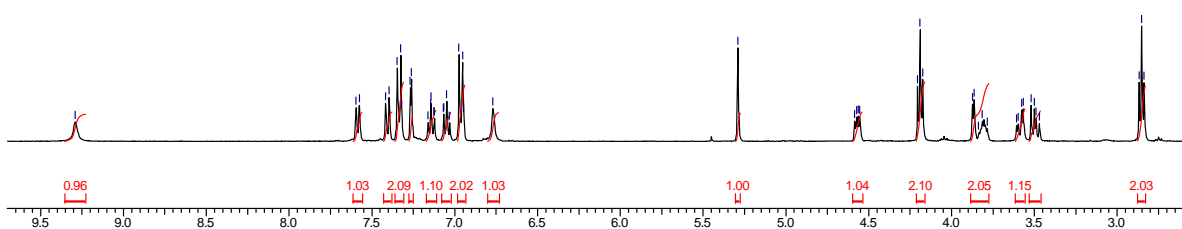



oxazinin-5

16 May 2011  
 wed3av400#012  
 13C

|                        |        |                       |       |              |                     |                  |          |
|------------------------|--------|-----------------------|-------|--------------|---------------------|------------------|----------|
| Acquisition Time (sec) | 1.2976 | Comment               | 13C   | Date         | 14/04/2011 10:21:50 | Frequency (MHz)  | 100.61   |
| Nucleus                | 13C    | Original Points Count | 32768 | Points Count | 32768               | Sweep Width (Hz) | 25252.53 |
| Temperature (grad C)   | 0.000  |                       |       |              |                     |                  |          |

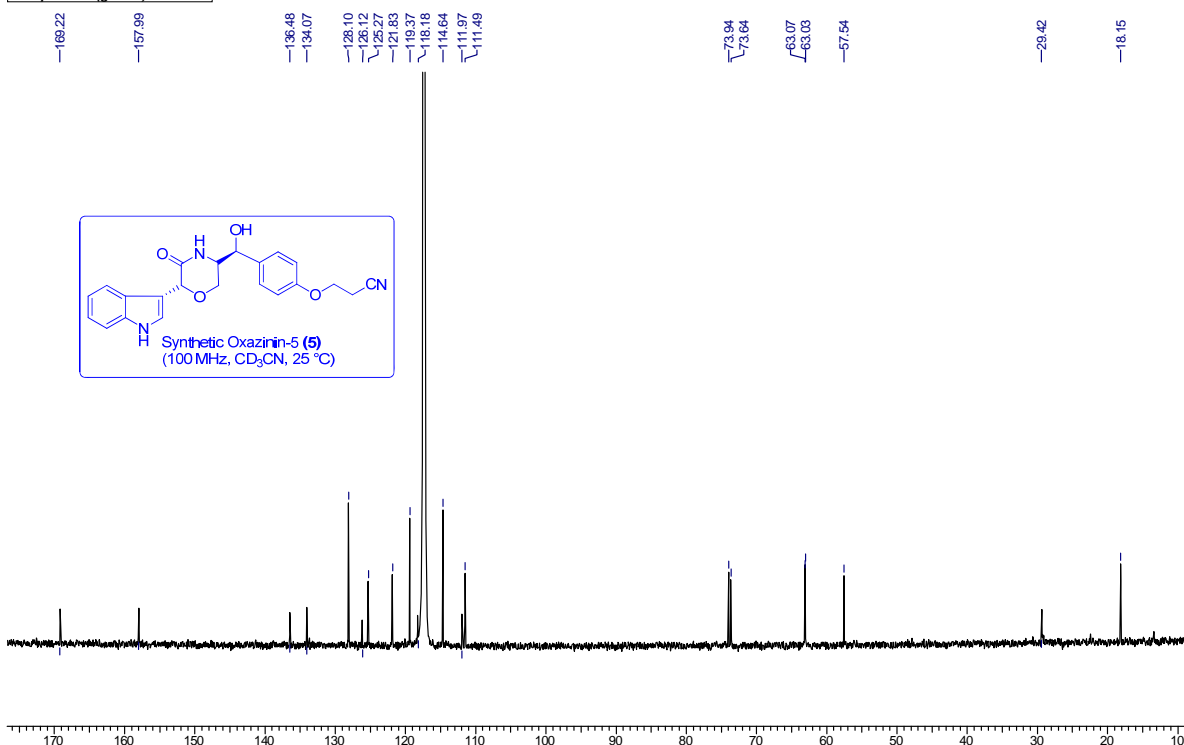

oxazinin-5

16 May 2011  
 wed3av400#012  
 DEPT

|                        |        |                       |       |              |                     |                  |          |
|------------------------|--------|-----------------------|-------|--------------|---------------------|------------------|----------|
| Acquisition Time (sec) | 1.2976 | Comment               | DEPT  | Date         | 14/04/2011 10:22:24 | Frequency (MHz)  | 100.61   |
| Nucleus                | 13C    | Original Points Count | 32768 | Points Count | 32768               | Sweep Width (Hz) | 25252.53 |
| Temperature (grad C)   | 0.000  |                       |       |              |                     |                  |          |

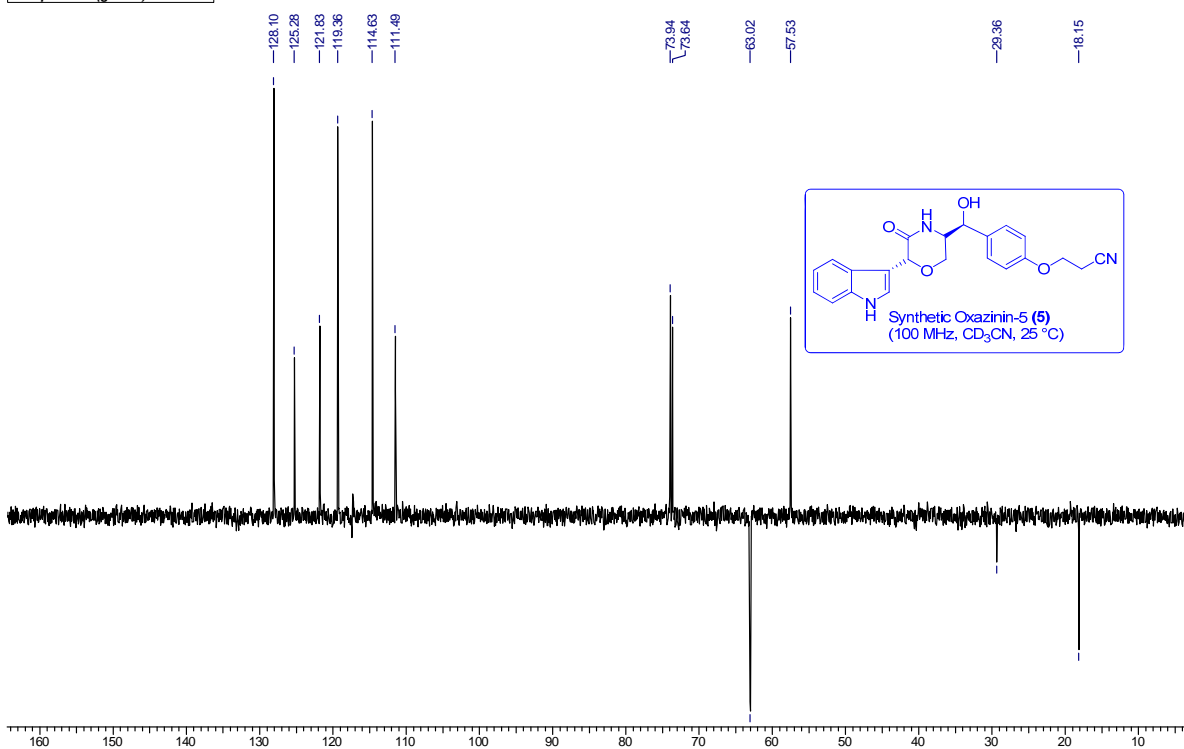

17 May 2011  
 Mon1av400#005  
 Vijendra

|                        |        |                       |          |              |                     |                      |         |
|------------------------|--------|-----------------------|----------|--------------|---------------------|----------------------|---------|
| Acquisition Time (sec) | 4.0894 | Comment               | Vijendra | Date         | 03/05/2011 10:05:10 | Frequency (MHz)      | 400.13  |
| Nucleus                | 1H     | Original Points Count | 32768    | Points Count | 32768               | Sweep Width (Hz)     | 8012.82 |
|                        |        |                       |          |              |                     | Temperature (grad C) | 0.000   |

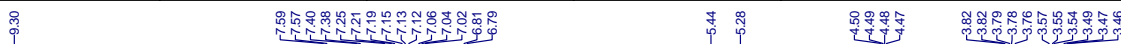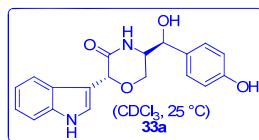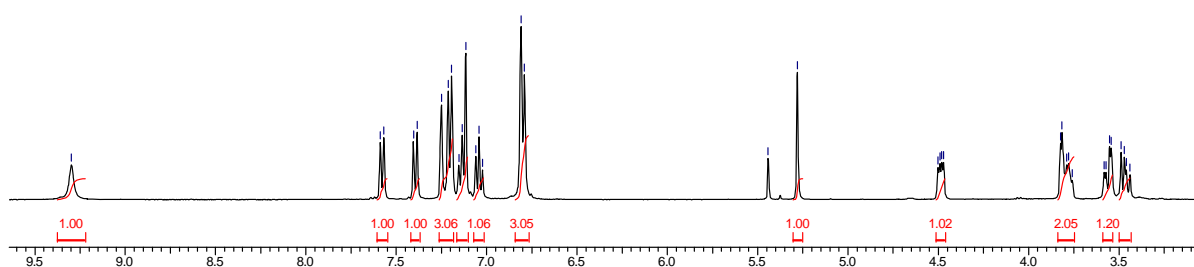

17 May 2011  
 Mon1av400#005  
 Vijendra

|                        |        |                       |          |              |                     |                      |          |
|------------------------|--------|-----------------------|----------|--------------|---------------------|----------------------|----------|
| Acquisition Time (sec) | 1.3631 | Comment               | Vijendra | Date         | 03/05/2011 10:06:22 | Frequency (MHz)      | 100.61   |
| Nucleus                | 13C    | Original Points Count | 32768    | Points Count | 32768               | Sweep Width (Hz)     | 24038.46 |
|                        |        |                       |          |              |                     | Temperature (grad C) | 0.000    |

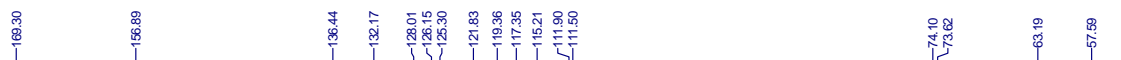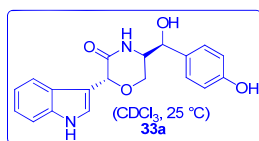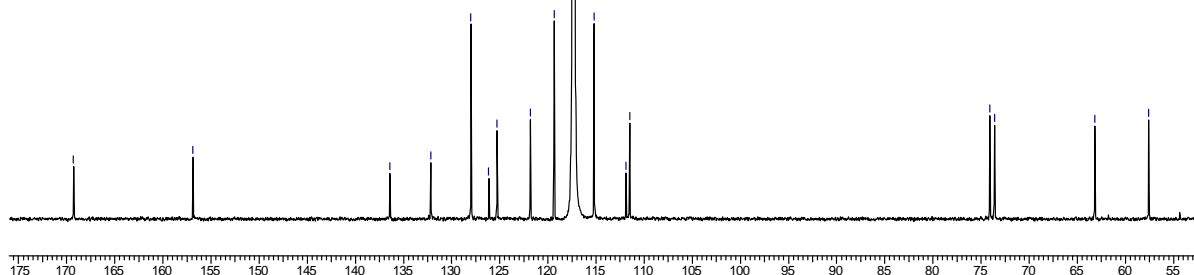

17 May 2011  
 Mon1av400#005  
 DEPT

|                        |                 |                       |          |              |                     |                  |          |
|------------------------|-----------------|-----------------------|----------|--------------|---------------------|------------------|----------|
| Acquisition Time (sec) | 1.3631          | Comment               | Vijendra | Date         | 03/05/2011 10:06:00 | Frequency (MHz)  | 100.61   |
| Nucleus                | <sup>13</sup> C | Original Points Count | 32768    | Points Count | 32768               | Sweep Width (Hz) | 24038.46 |
| Temperature (grad C)   | 0.000           |                       |          |              |                     |                  |          |

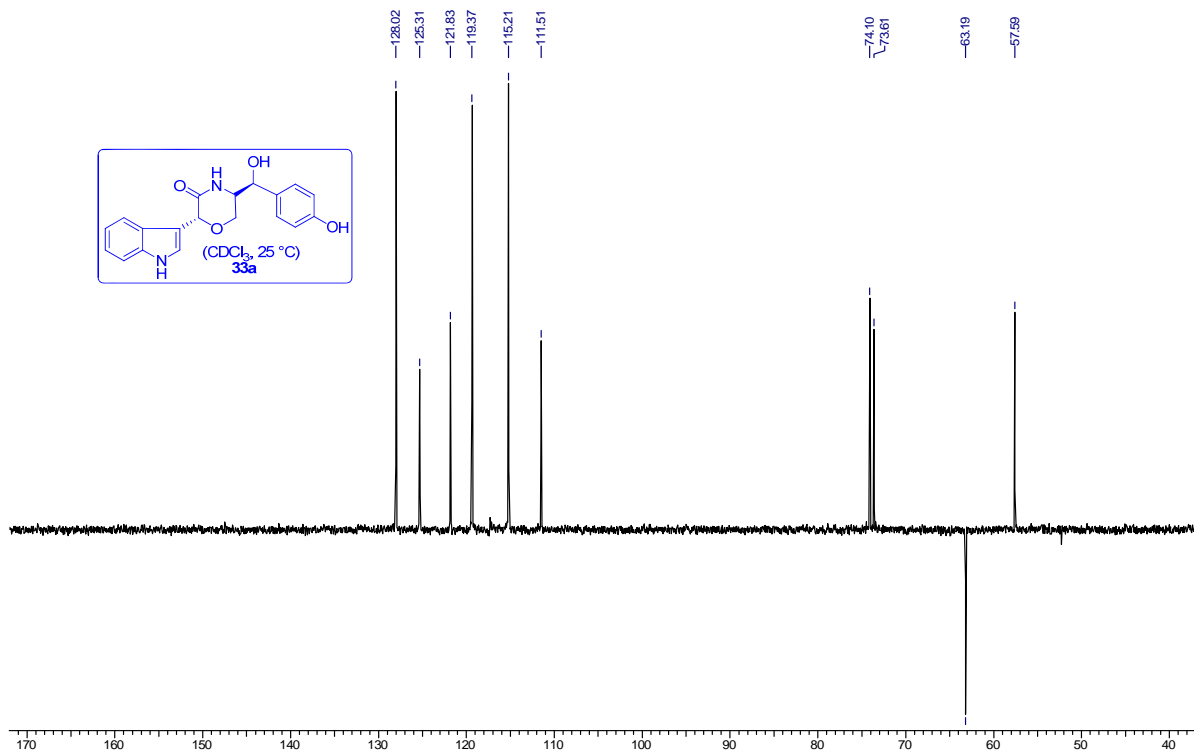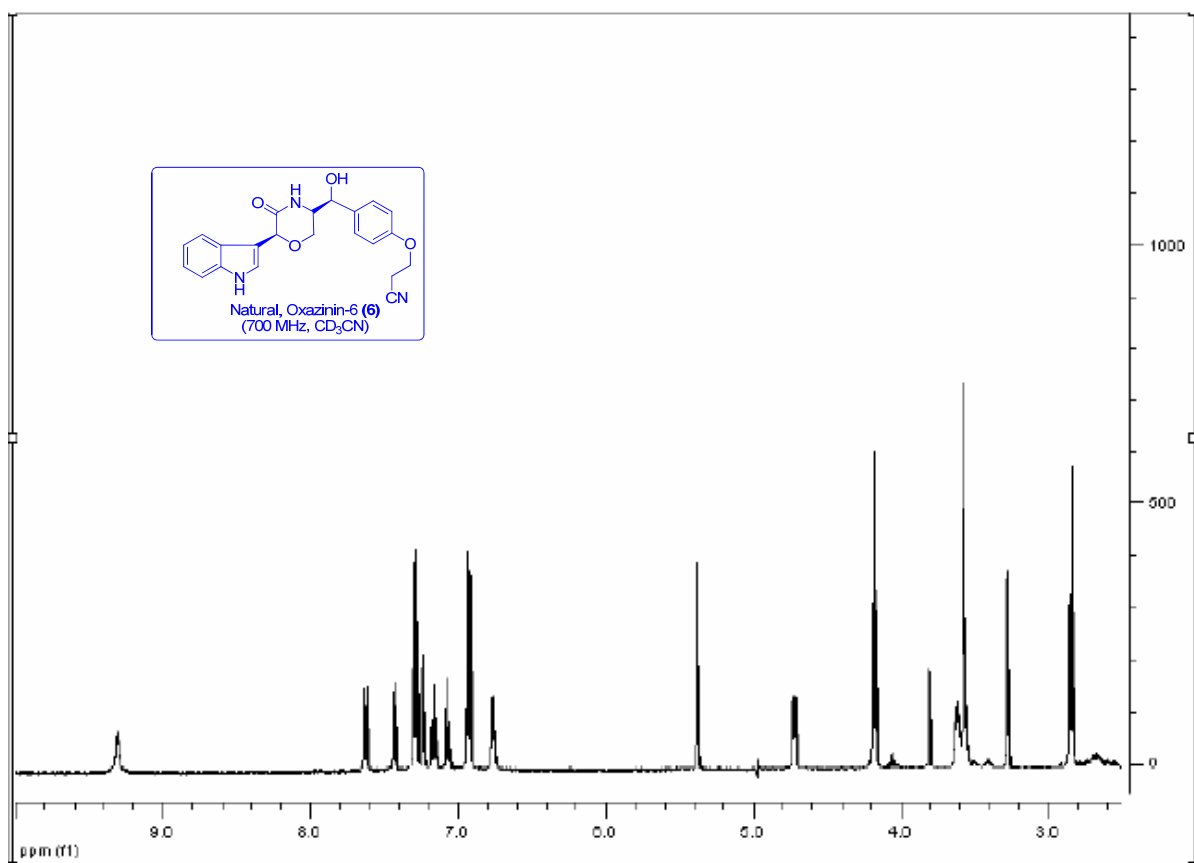

oxazinin-6

17 May 2011  
 sat5av400#009  
 1H

|                        |        |                       |          |              |                     |                  |         |
|------------------------|--------|-----------------------|----------|--------------|---------------------|------------------|---------|
| Acquisition Time (sec) | 4.0894 | Comment               | Vijendra | Date         | 30/04/2011 17:36:36 | Frequency (MHz)  | 400.13  |
| Nucleus                | 1H     | Original Points Count | 32768    | Points Count | 32768               | Sweep Width (Hz) | 8012.82 |
| Temperature (grad C)   | 0.000  |                       |          |              |                     |                  |         |

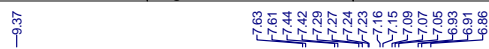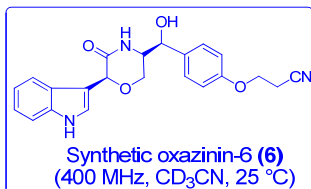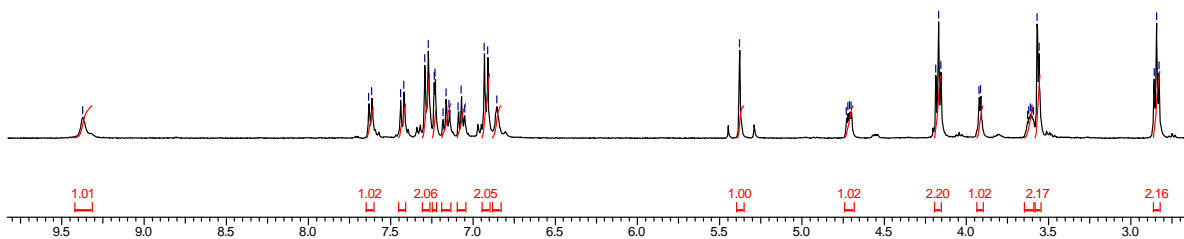

oxazinin-6

17 May 2011  
 sat5av400#009  
 13C

|                        |        |                       |       |              |                     |                  |          |
|------------------------|--------|-----------------------|-------|--------------|---------------------|------------------|----------|
| Acquisition Time (sec) | 1.3631 | Comment               | 13c   | Date         | 01/05/2011 09:36:18 | Frequency (MHz)  | 100.61   |
| Nucleus                | 13C    | Original Points Count | 32768 | Points Count | 32768               | Sweep Width (Hz) | 24038.46 |
| Temperature (grad C)   | 0.000  |                       |       |              |                     |                  |          |

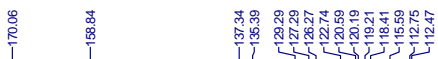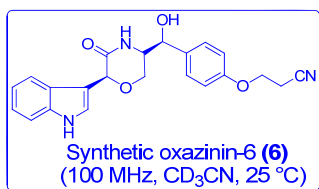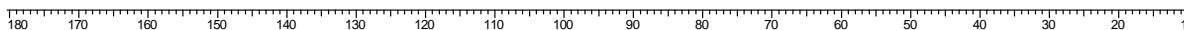

oxazinin-6

17 May 2011  
 sat5av400#009  
 Vijendra

|                        |                 |                       |          |              |                     |                  |          |
|------------------------|-----------------|-----------------------|----------|--------------|---------------------|------------------|----------|
| Acquisition Time (sec) | 1.3631          | Comment               | Vijendra | Date         | 01/05/2011 09:36:58 | Frequency (MHz)  | 100.61   |
| Nucleus                | <sup>13</sup> C | Original Points Count | 32768    | Points Count | 32768               | Sweep Width (Hz) | 24038.46 |
| Temperature (grad C)   | 0.000           |                       |          |              |                     |                  |          |

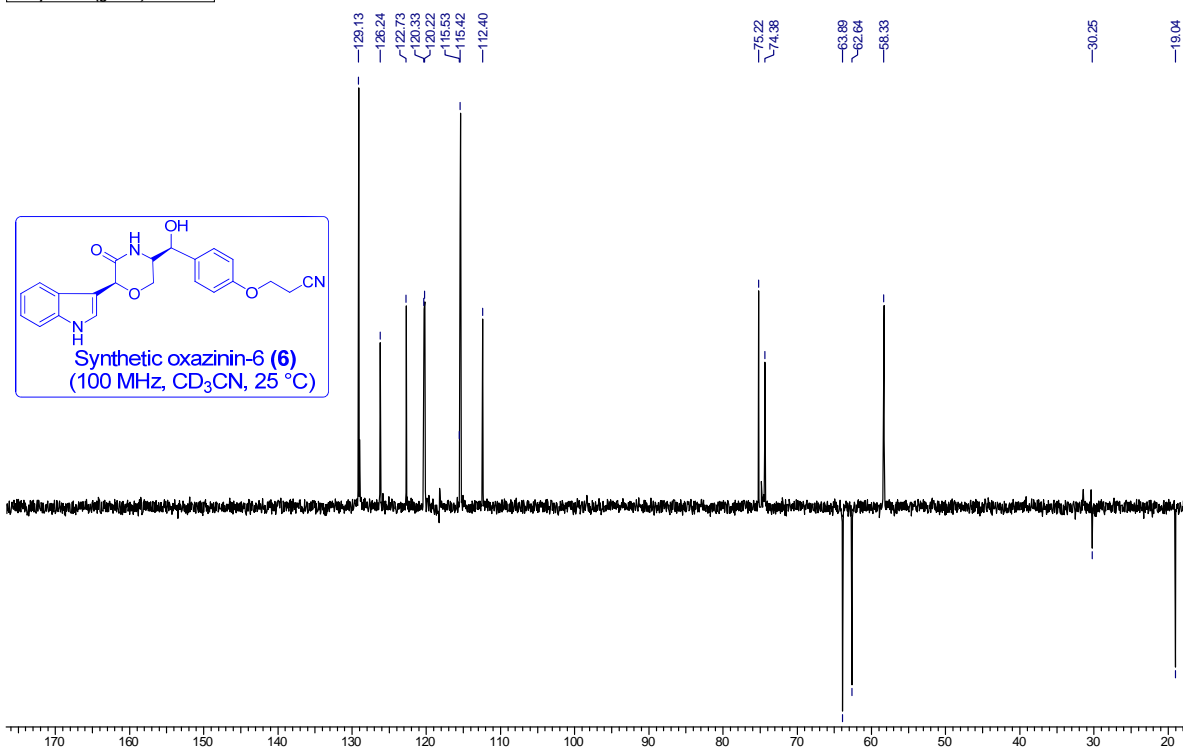

17 May 2011  
 Thu2av400#009  
 1H side product

|                        |                |                       |          |              |                     |                  |         |
|------------------------|----------------|-----------------------|----------|--------------|---------------------|------------------|---------|
| Acquisition Time (sec) | 4.0894         | Comment               | Vijendra | Date         | 13/05/2011 08:57:00 | Frequency (MHz)  | 400.13  |
| Nucleus                | <sup>1</sup> H | Original Points Count | 32768    | Points Count | 32768               | Sweep Width (Hz) | 8012.82 |
| Temperature (grad C)   | 0.000          |                       |          |              |                     |                  |         |

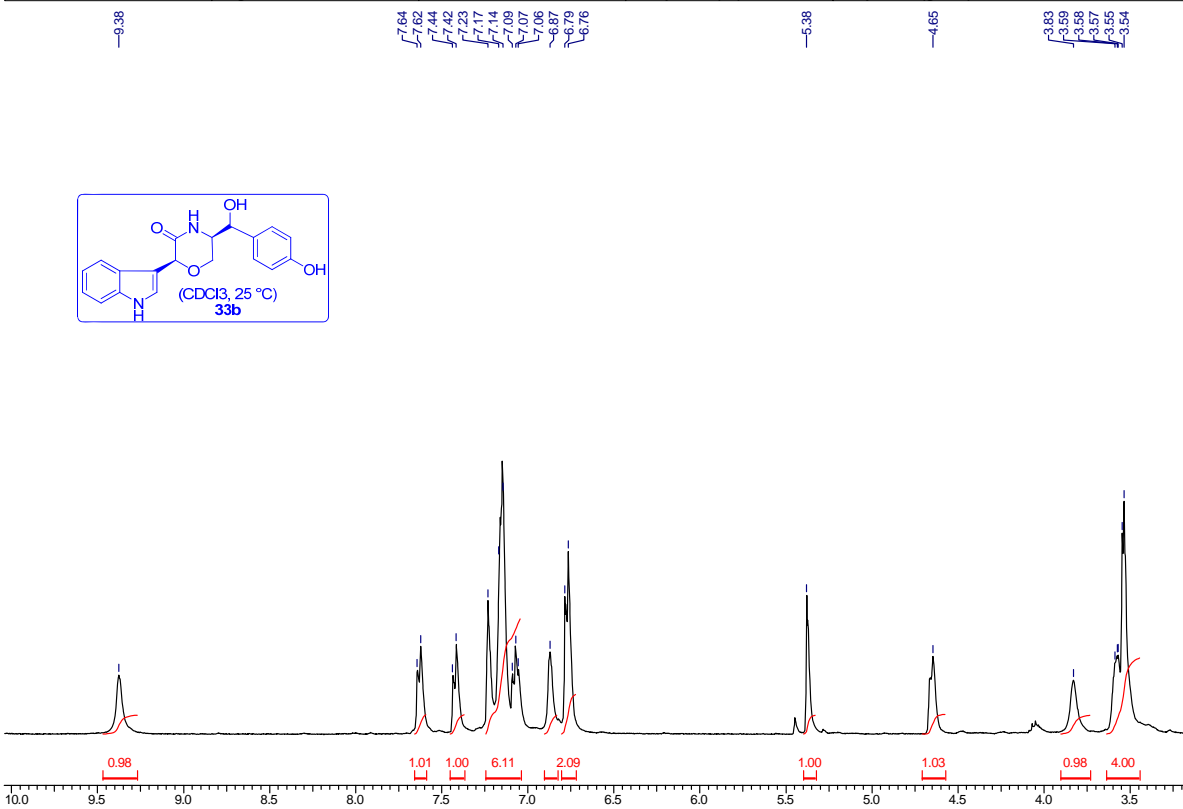

17 May 2011  
 Thu2av400#009  
 13C side product

|                        |        |                       |       |              |                     |                  |          |
|------------------------|--------|-----------------------|-------|--------------|---------------------|------------------|----------|
| Acquisition Time (sec) | 1.3631 | Comment               | 13C   | Date         | 13/05/2011 08:59:50 | Frequency (MHz)  | 100.61   |
| Nucleus                | 13C    | Original Points Count | 32768 | Points Count | 32768               | Sweep Width (Hz) | 24038.46 |
| Temperature (grad C)   | 0.000  |                       |       |              |                     |                  |          |

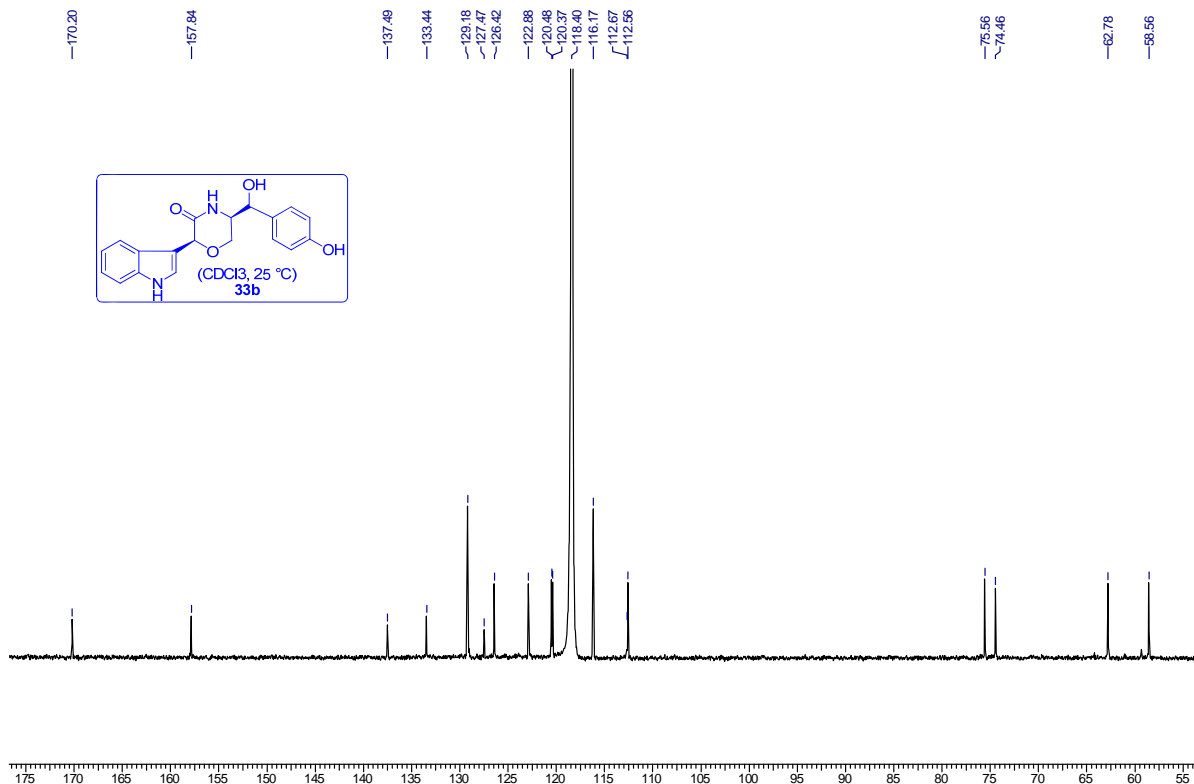

17 May 2011  
 Thu2av400#009  
 DEPT, side product

|                        |        |              |                     |                  |          |                      |       |
|------------------------|--------|--------------|---------------------|------------------|----------|----------------------|-------|
| Acquisition Time (sec) | 1.3631 | Date         | 13/05/2011 08:57:22 | Frequency (MHz)  | 100.61   | Nucleus              | 13C   |
| Original Points Count  | 32768  | Points Count | 32768               | Sweep Width (Hz) | 24038.46 | Temperature (grad C) | 0.000 |

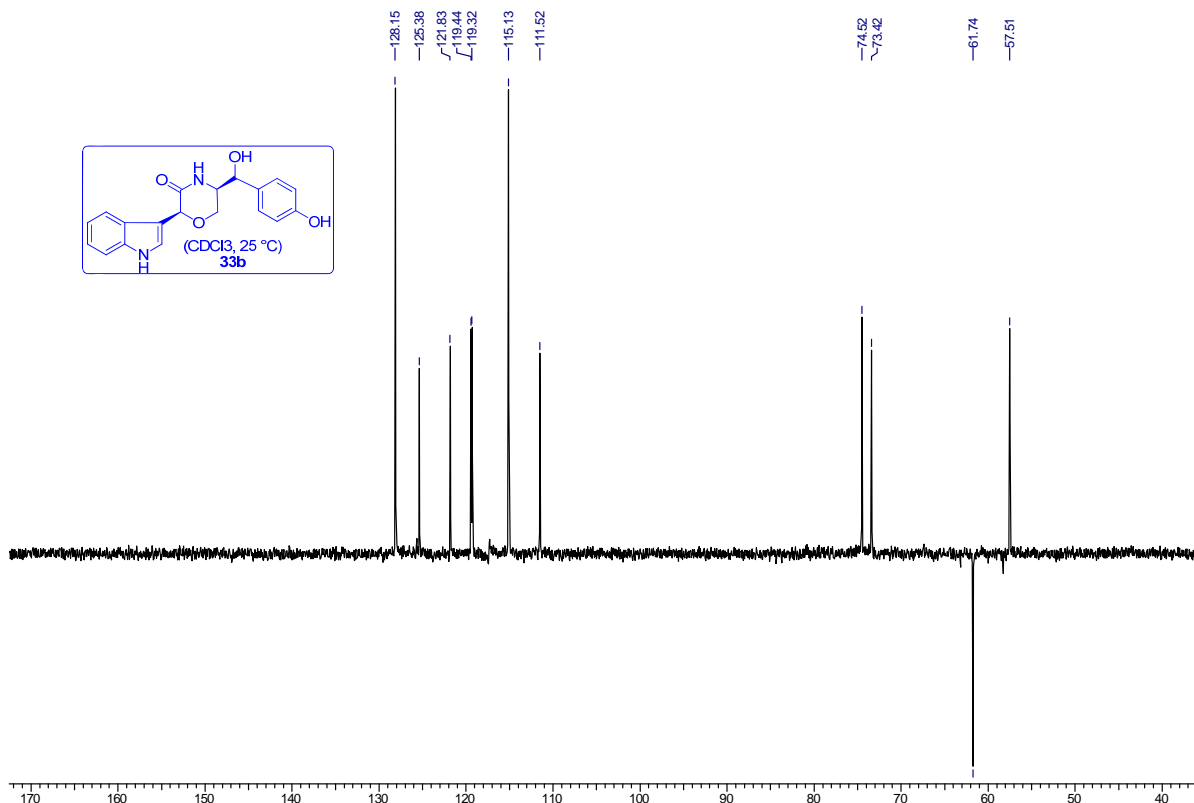

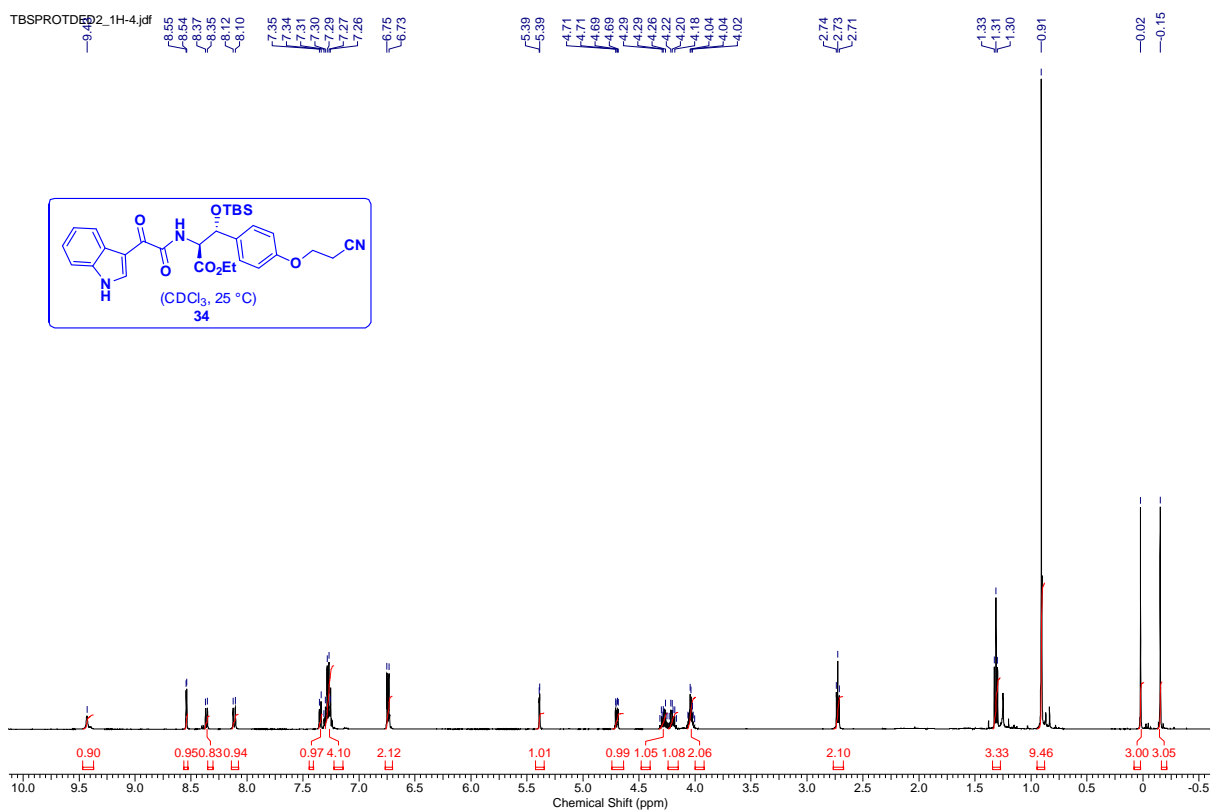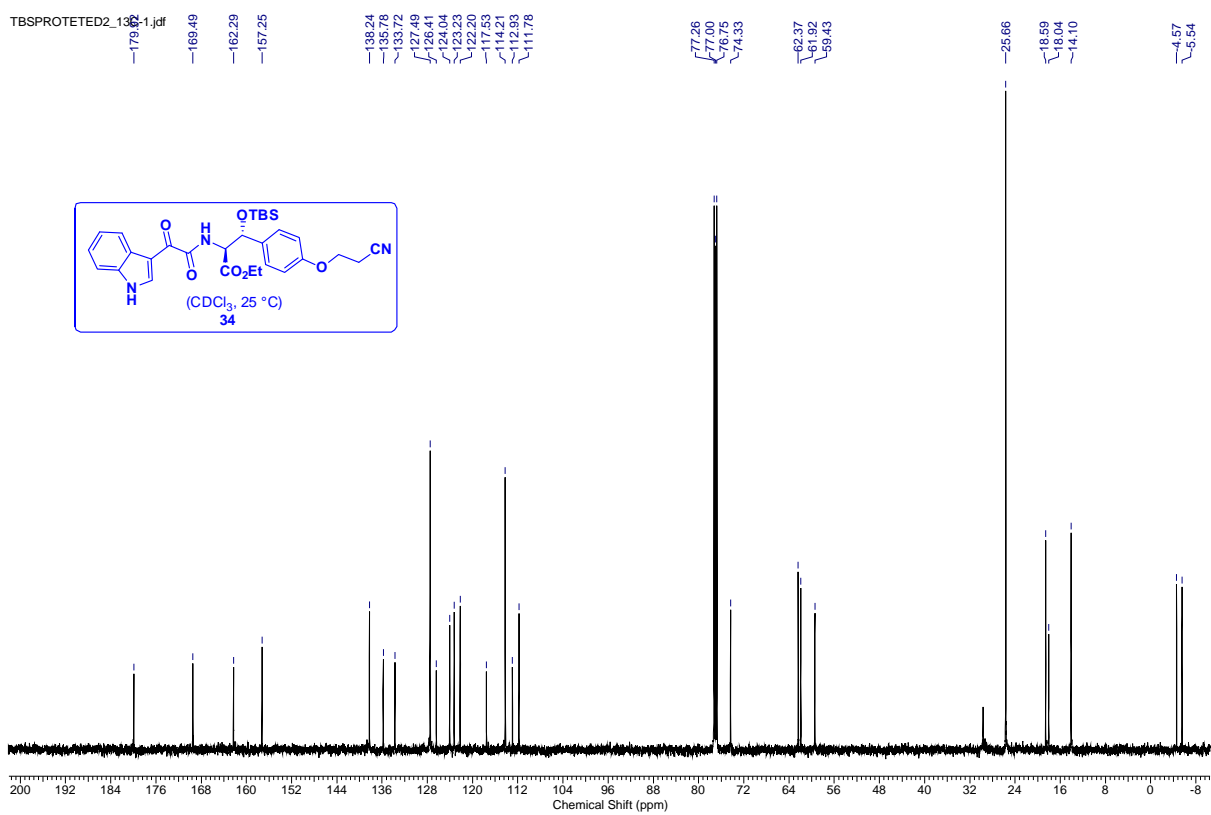

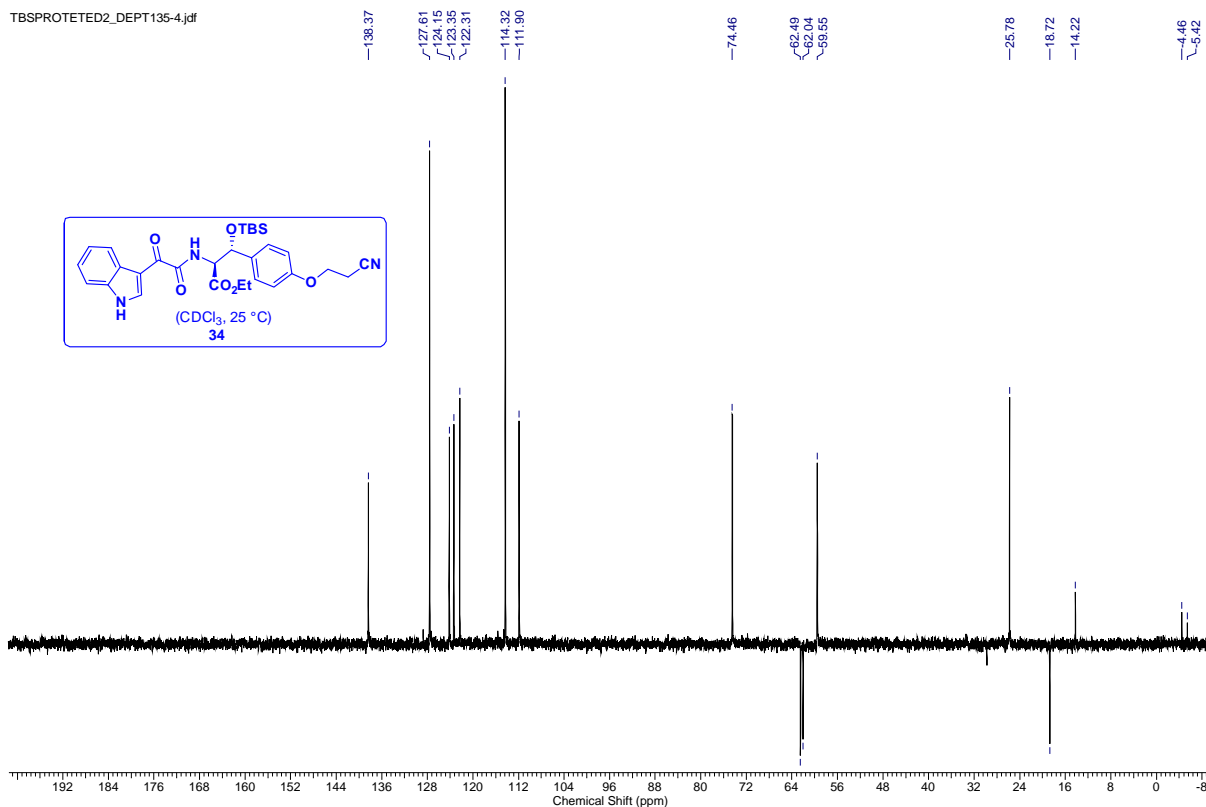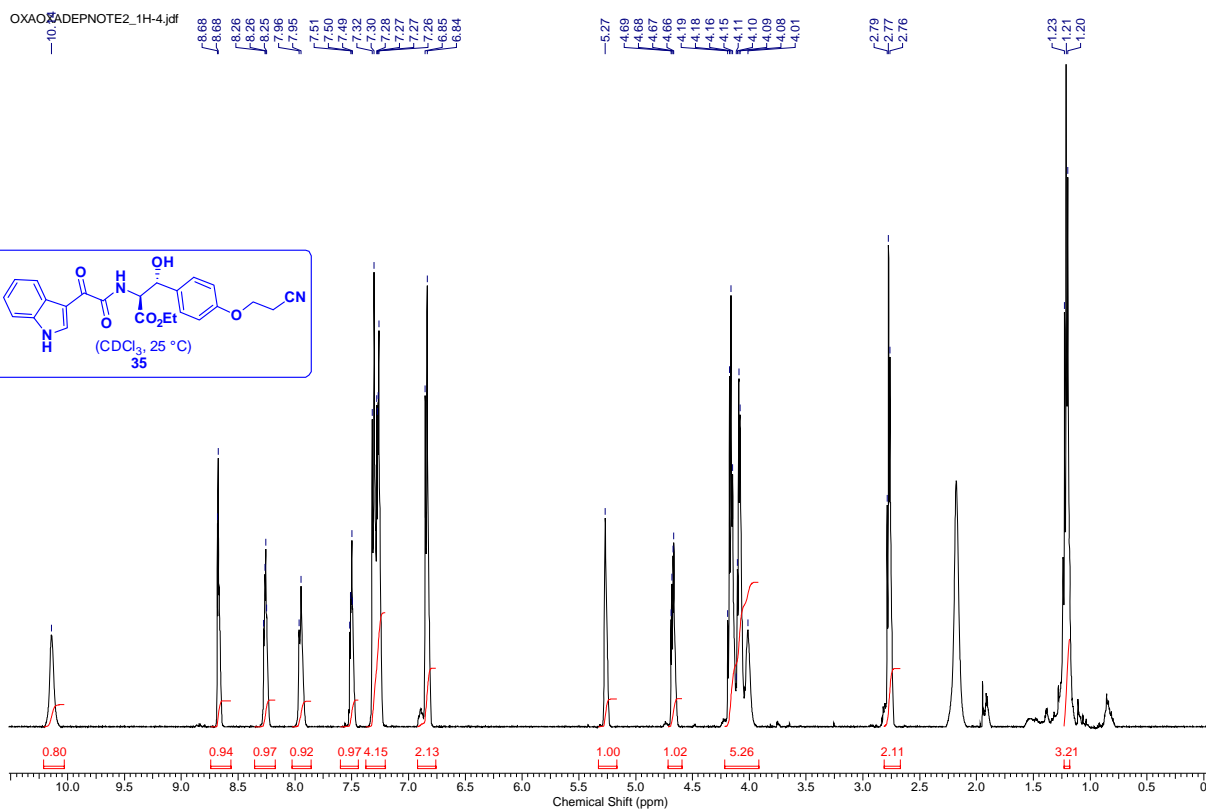



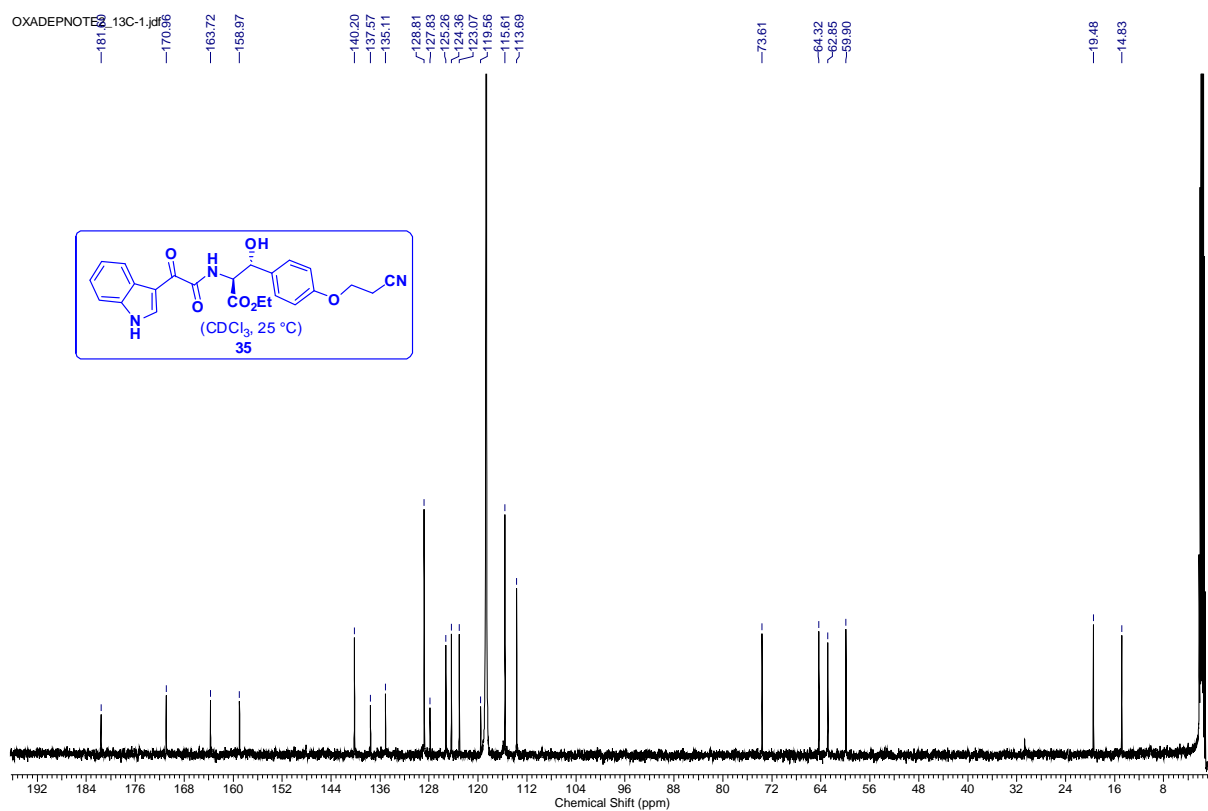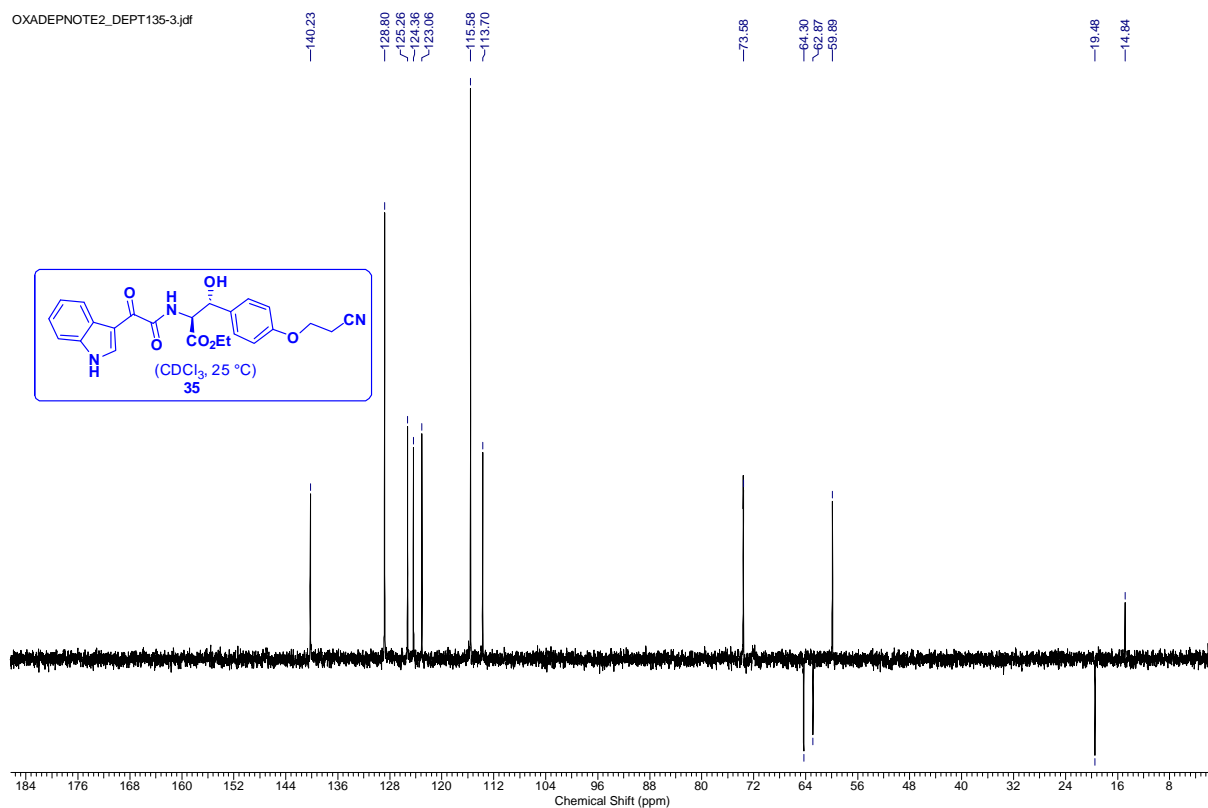

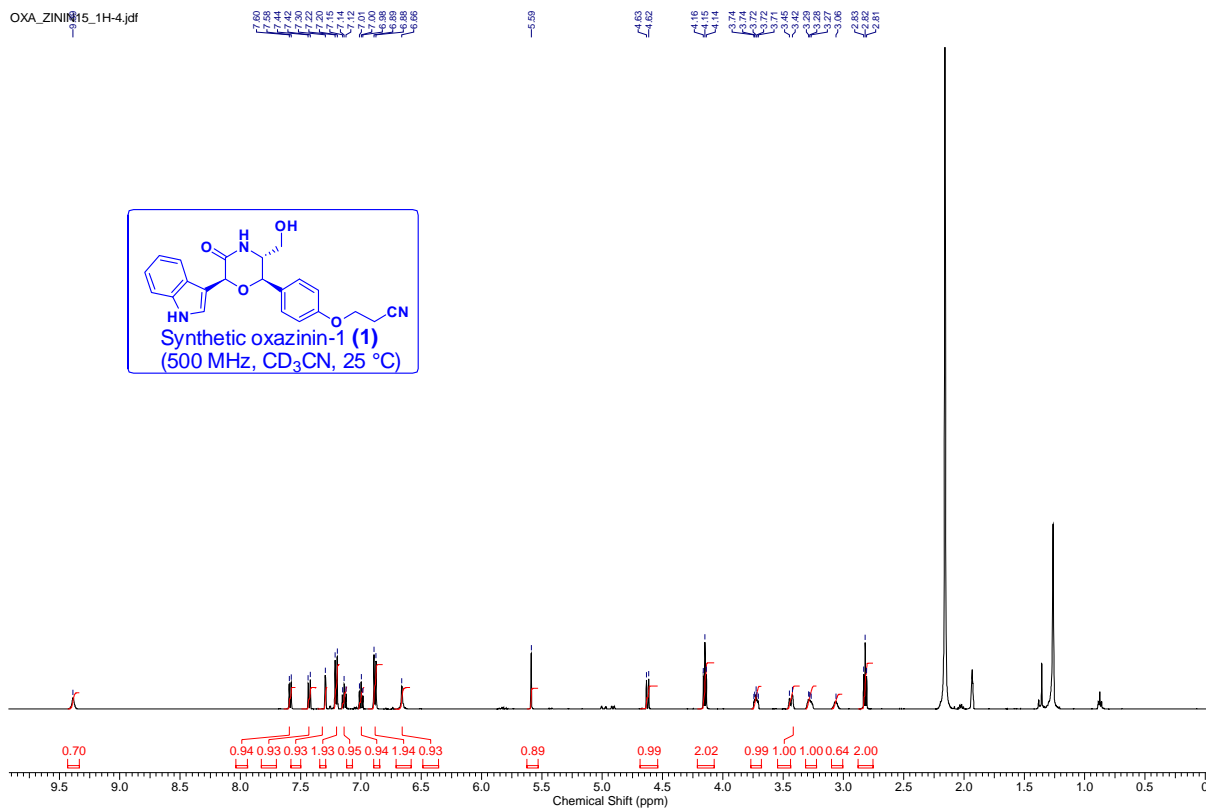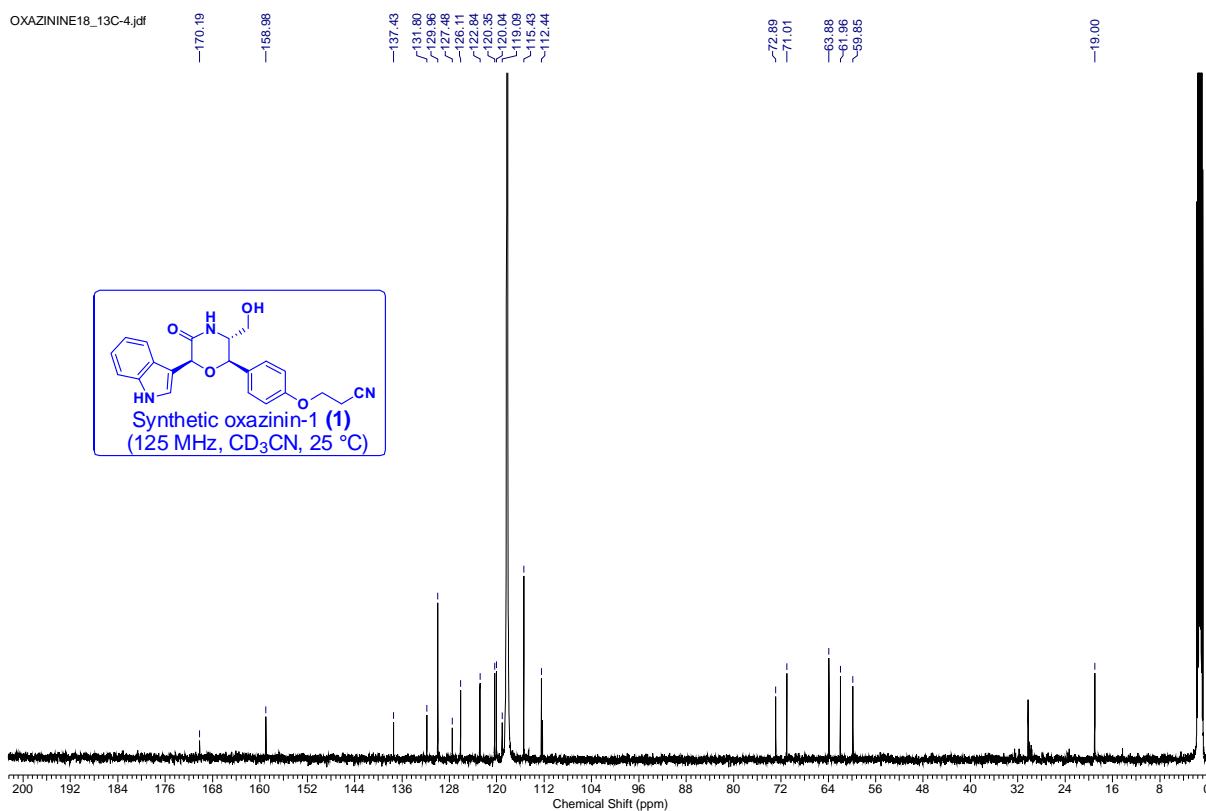

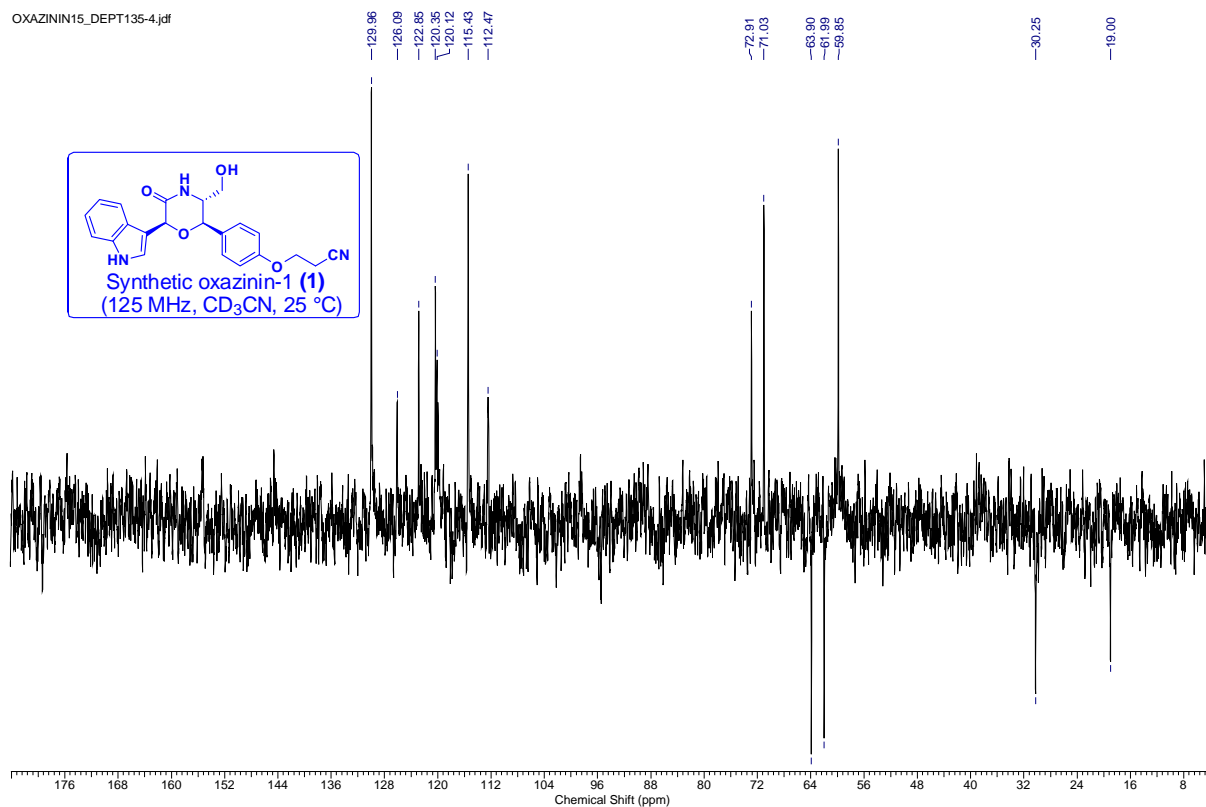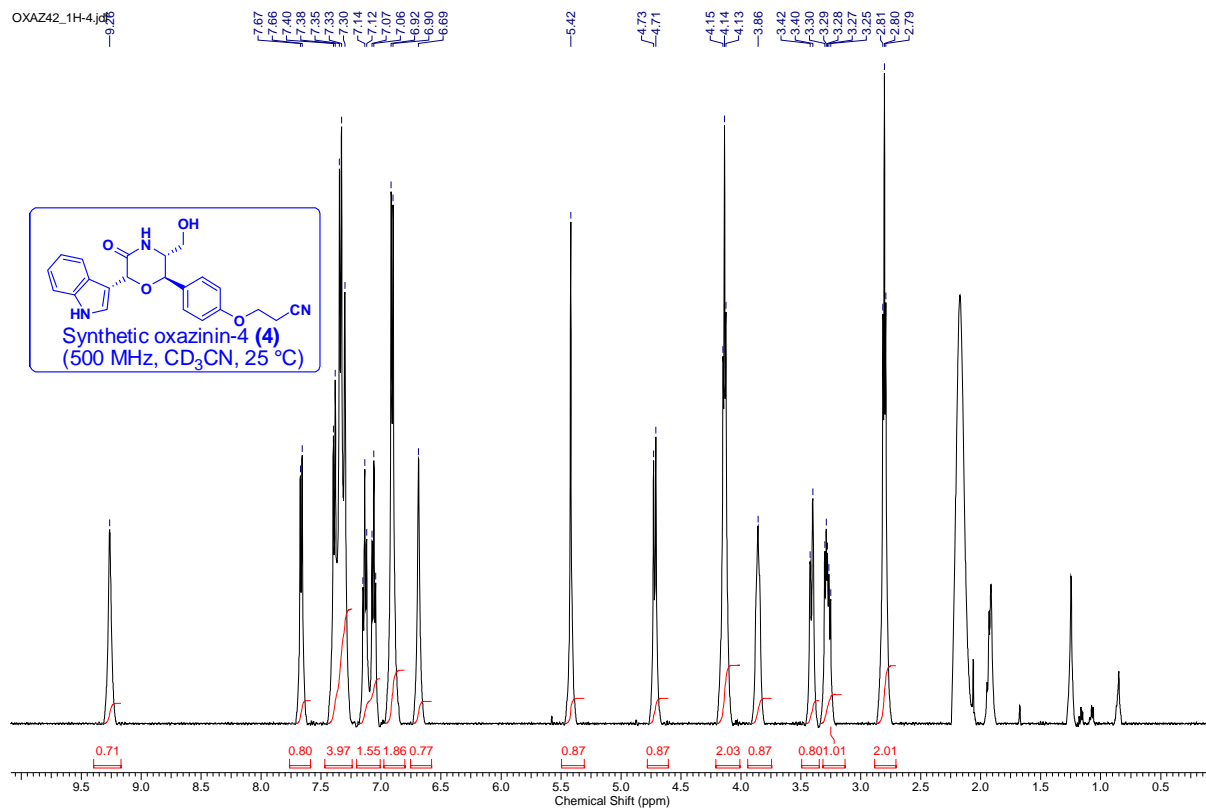

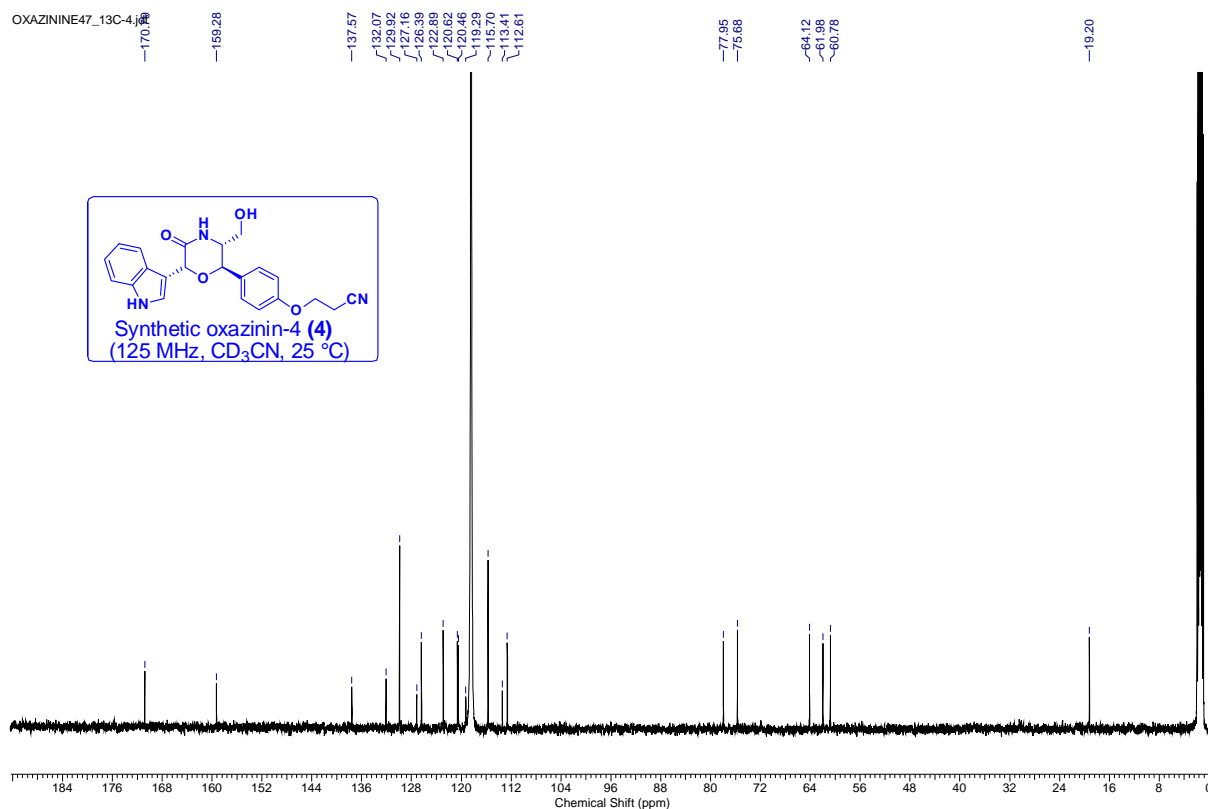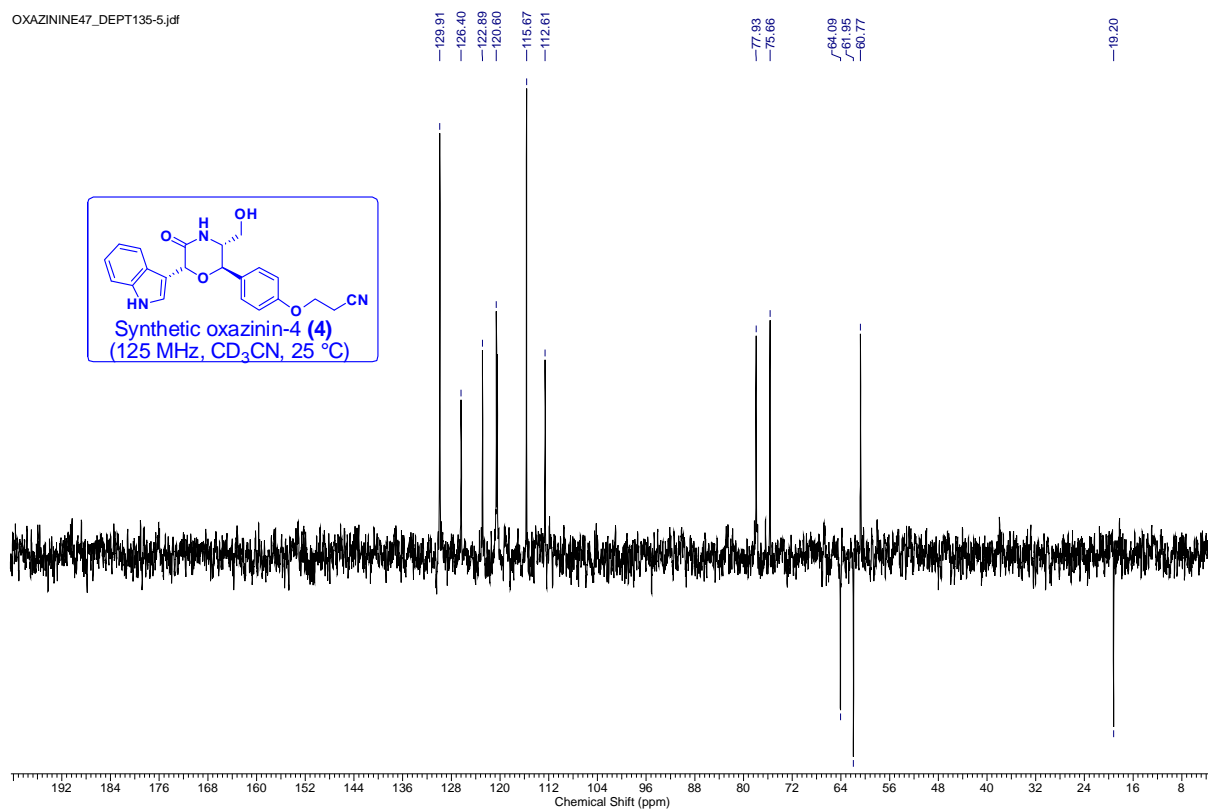

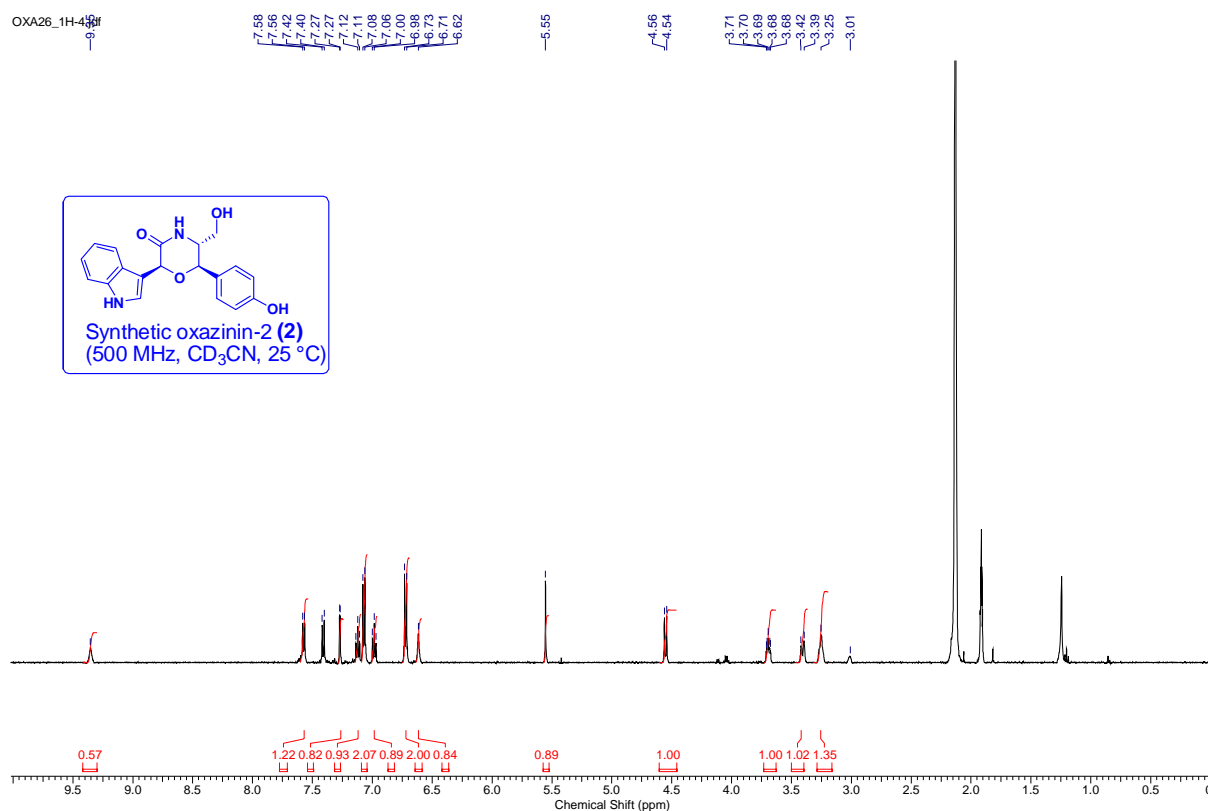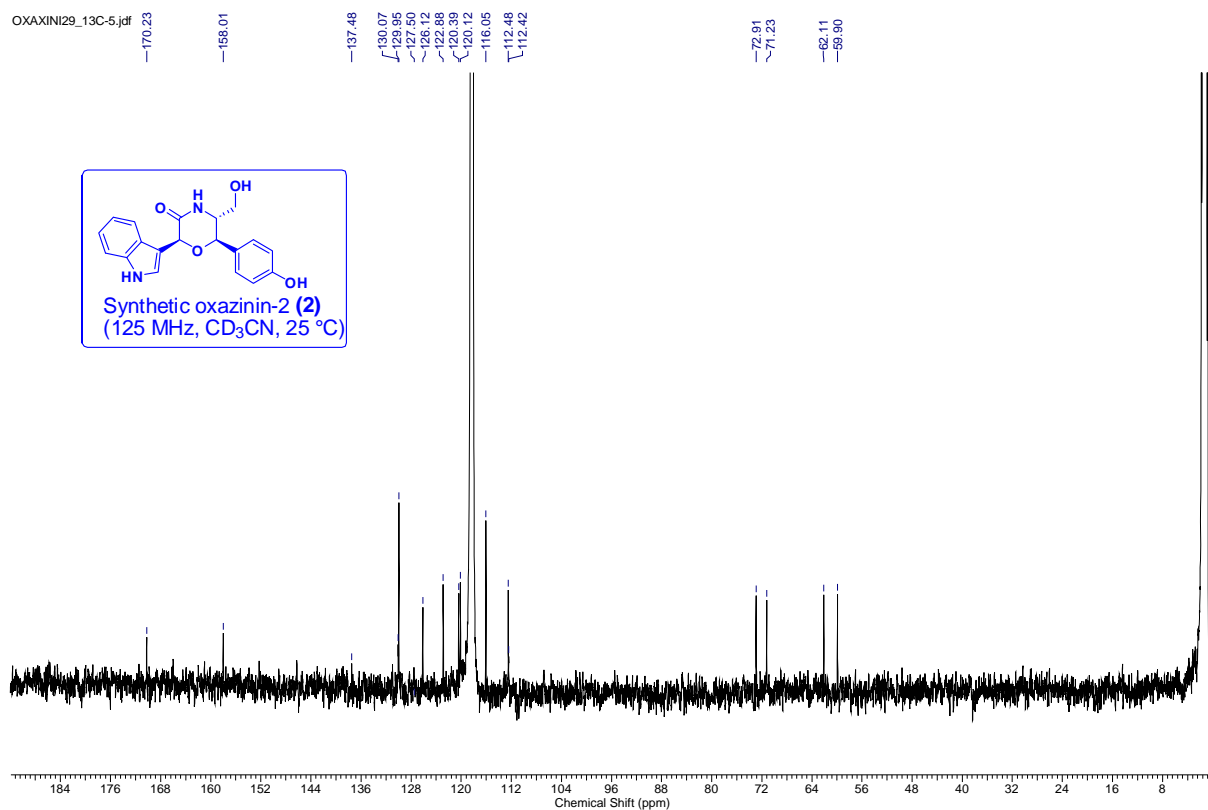

OXAXINI29\_DEPT135-4.jdf

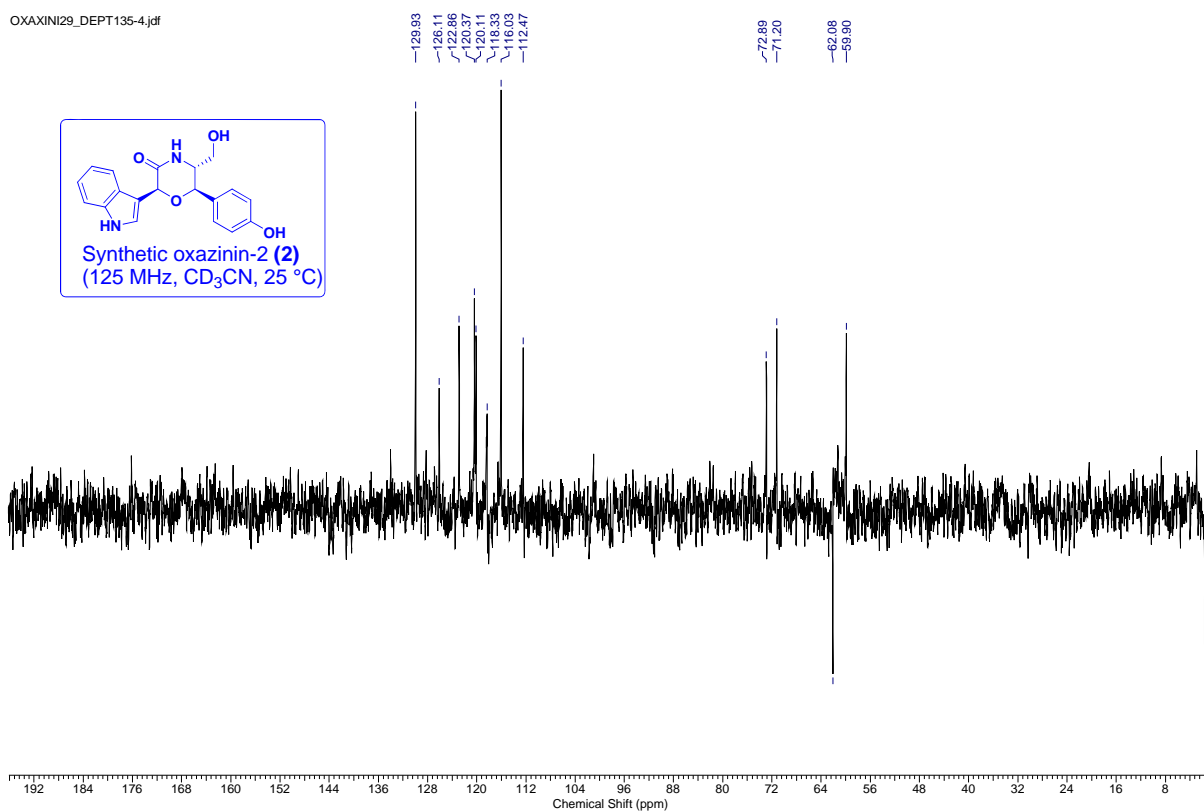

### Reported CD Spectra of Natural Oxazinin-5 (5):

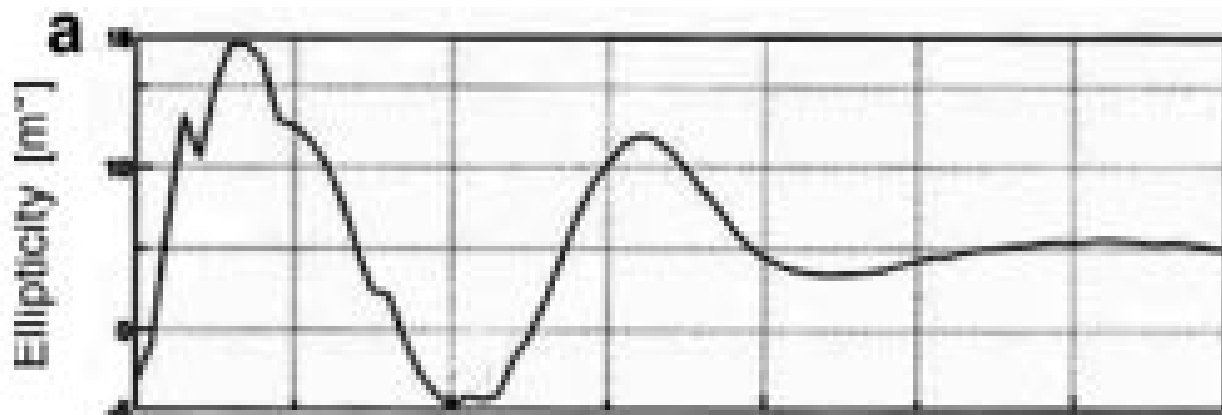

### CD Spectra of Synthetic Oxazinin-5 (5):

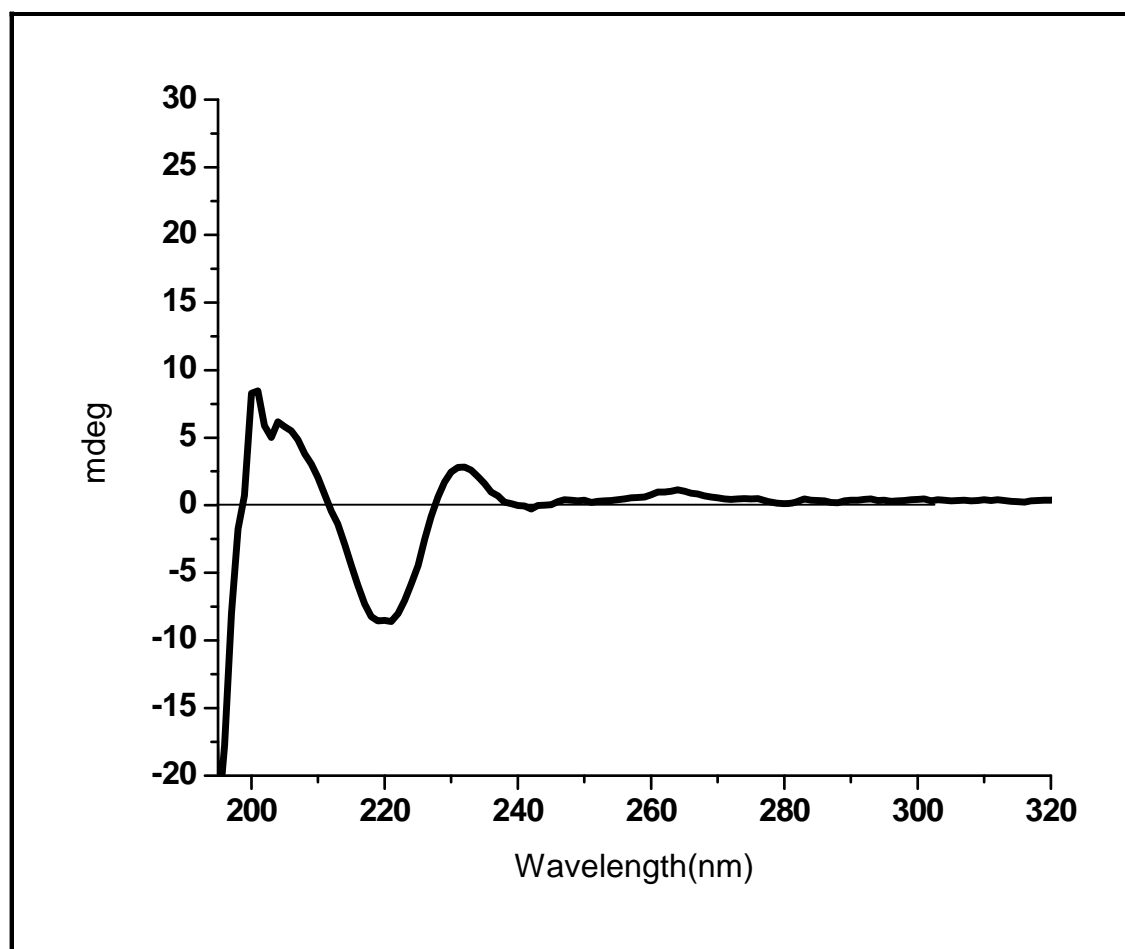

### Reported CD spectra of Natural Preoxazinin-7 (7):

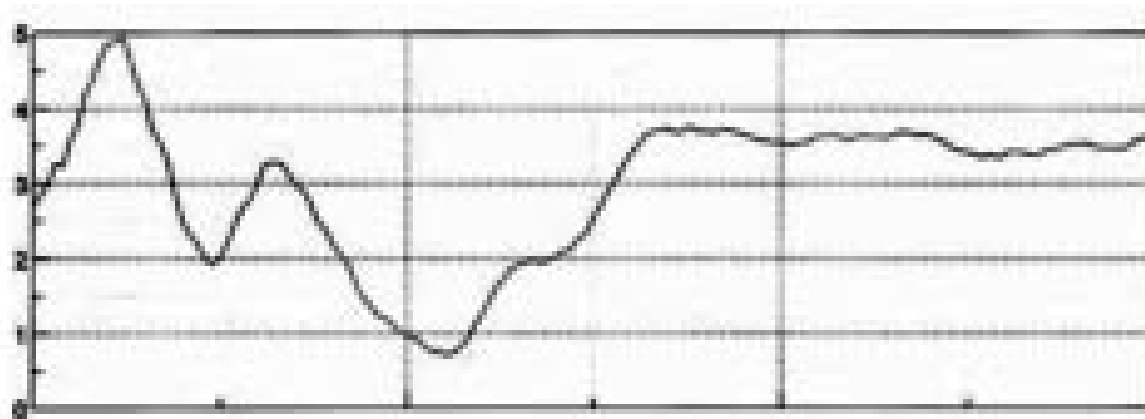

### CD spectra of Synthetic Preoxazin -7 (7):

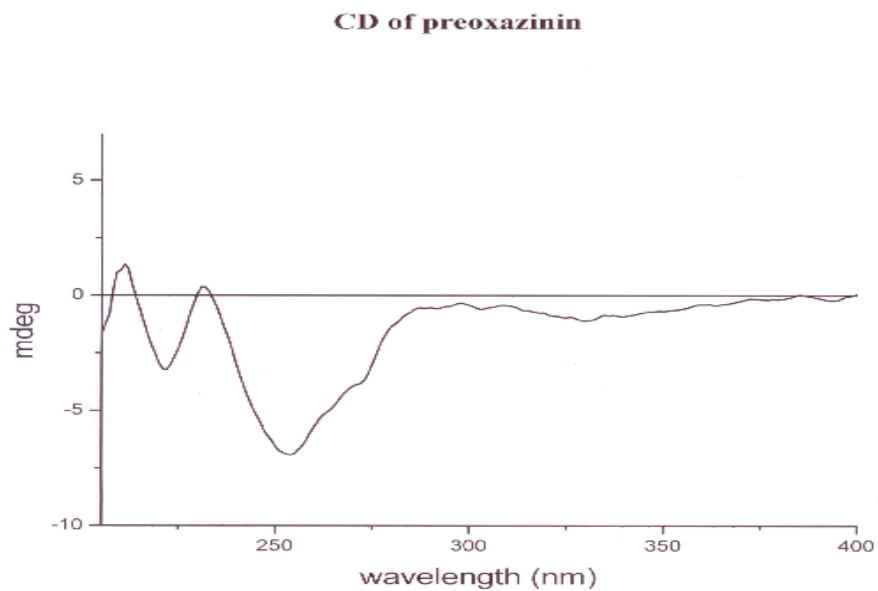

### Reported CD spectra of Natural Oxazin-6 (6):

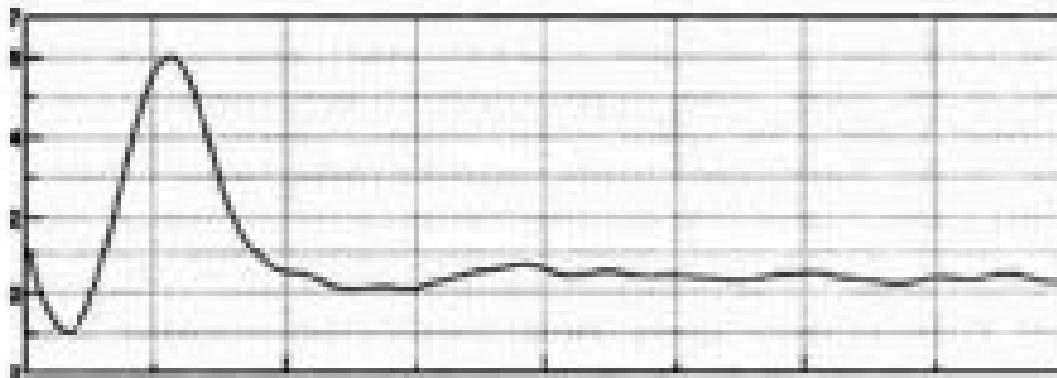



### CD Spectra of Synthetic oxazinin-6 (6):

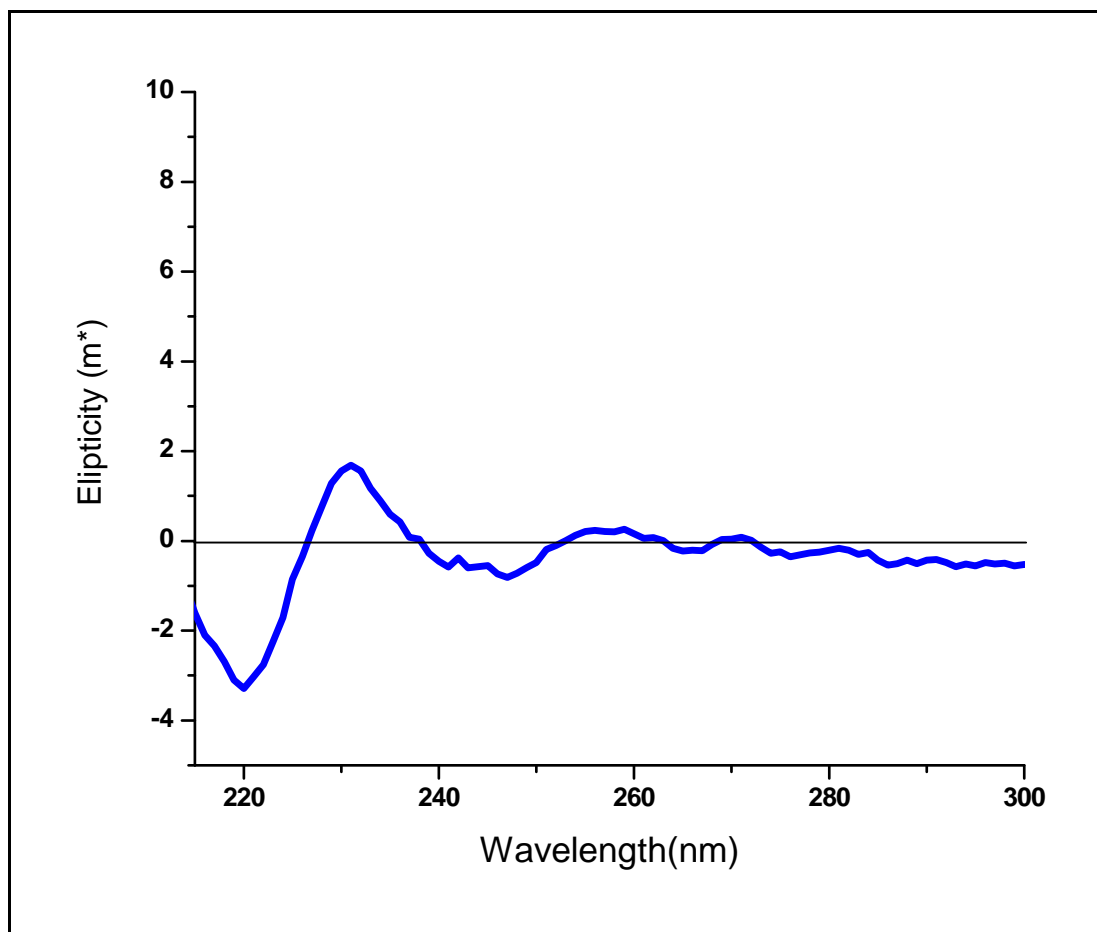

## Enantiomeric excess of (2*S*,3*R*)-ethyl 3-(4-(benzyloxy)phenyl)-2-(*tert*-butoxycarbonylamino)-3-hydroxypropanoate (Recemic):

Shimadzu CLASS-VP V6.12 SP5  
Method Name: C:\CLASS-VP\Method ch 2.met  
Data Name: C:\CLASS-VP\Data\General\AL 1009  
User: System  
Acquired: 6/7/11 2:18:14 PM  
Printed: 6/7/11 5:36:31 PM  
Sample Name ALOK AMI - Racemic

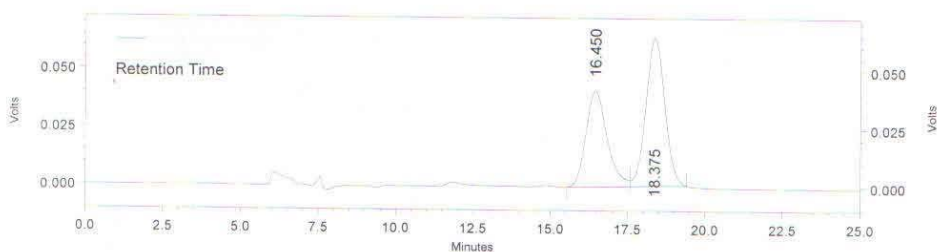

| Detector A - 1 (230nm) |                |         |         |
|------------------------|----------------|---------|---------|
|                        | Retention Time | C Area  | Area %  |
|                        | 16.450         | 1975302 | 41.806  |
|                        | 18.375         | 2749650 | 58.194  |
|                        | Totals         | 4724952 | 100.000 |

Project Leader :Dr.Dethe D.H.  
Column :Kromasil 5-CelluCoat (0.46cm X 25cm)  
Mobile Phase :IPA:PE (15:85)  
Flow Rate : 0.5 ml/min 35kgf  
Wavelength : 230nm  
Con. : xmg /1.0m  
Inject vol. :5uL

## Enantiomeric excess of (2*S*,3*R*)-ethyl 3-(4-(benzyloxy)phenyl)-2-(*tert*-butoxycarbonylamino)-3-hydroxypropanoate (21) (Chiral):

D-7000 HSM: NCLOC      Series: 3871      Report: modified      System: Sys 1

**NATIONAL CHEMICAL LABORATORY**  
ORGANIC CHEMISTRY TECHNOLOGY

Analyzed: 06/03/11 04:44 PM      Reported: 06/03/11 05:08 PM  
Data Path: f:\win32app\hsm\NCLOC\DATA\3871\  
Processing Method: Lichrosphere RP-18 (250-4)      Acquisition Method: Lichrosphere RP-18 (250-4)

System(acquisition): Sys 1      Series:3871  
Sample Name: AL-Chiral      Vial Number: 2  
Injection from vial: 1 of 1      Vial Type: UNK  
Volume: 10.0 ul

Chrom Type: HPLC Channel : 1

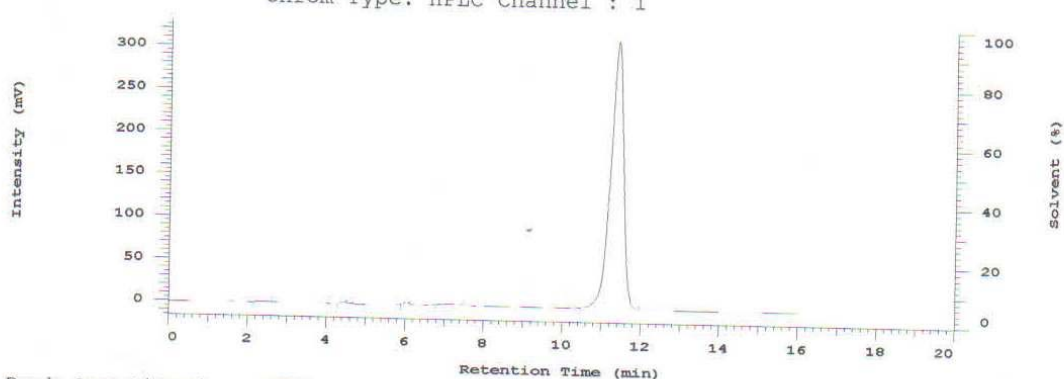

Peak Quantitation: AREA      Calculation Method: AREA%

| No. | RT    | Height | Area    | Area %  |
|-----|-------|--------|---------|---------|
| 1   | 2.35  | 320    | 7066    | 0.099   |
| 2   | 4.45  | 2043   | 15832   | 0.221   |
| 3   | 6.05  | 2204   | 20553   | 0.287   |
| 4   | 7.19  | 1139   | 30778   | 0.430   |
| 5   | 11.39 | 312512 | 7078235 | 98.962  |
|     |       | 318218 | 7152464 | 100.000 |

Peak rejection level: 0

Group Leader :Dr.Dethe D  
Column :Grace Denali RP-18 (250 X 4.6mm)  
M.P. :A)ACN:H2O (50:50)

Flow Rate :1.0 ml/min (1480 psi)  
Sample conc: x mg/ml  
Inj vol: 10 UL  
WAVELENGTH :230 nm

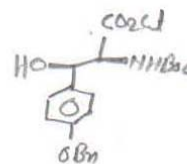

Supplement: c3ra44631j.pdf [file c3ra44631j.pdf]
